# Supplementary material
Source: PubMed Central journal article supplement (PMC3023914)
Supplement: NIHMS260295-supplement-Supporting_Info.pdf [file NIHMS260295-supplement-Supporting_Info.pdf]

Supplementary material for the publication:

"The prediction of 57-Fe Mössbauer parameters by the density functional theory: a benchmark study"

by Arteum D. Bochevarov, Richard A. Friesner, and Stephen J. Lippard

Contents:

- The atomic coordinates of the 31 complexes used in the non-optimized data set (in Å)
- The isomer shifts and quadrupole splittings predicted by 8 functionals and 2 basis sets for X-ray-based geometries
- The isomer shift calibrations for 8 functionals and 2 basis sets obtained for X-ray-based geometries

The Cartesian coordinates (in Angstrom)

=====

| 1. SISKOU |               |                |               |
|-----------|---------------|----------------|---------------|
| Fe1       | -1.5230000000 | -3.5910000000  | 0.6630000000  |
| Fe2       | -0.3600000000 | -6.2020000000  | 2.8070000000  |
| O3        | -0.0400000000 | -5.1390000000  | 1.0100000000  |
| O4        | -3.0150000000 | -2.1680000000  | 0.6210000000  |
| O5        | 0.0670000000  | -4.4490000000  | 3.8690000000  |
| O6        | -0.9940000000 | -2.8980000000  | 2.6410000000  |
| O7        | -2.3500000000 | -6.1530000000  | 3.2450000000  |
| O8        | -2.9530000000 | -4.9980000000  | 1.4330000000  |
| O9        | 2.0100000000  | -5.8520000000  | 1.3840000000  |
| O10       | -4.6760000000 | -0.9920000000  | 1.5020000000  |
| O11       | 0.3060000000  | -2.9560000000  | -3.7870000000 |
| O12       | -0.1240000000 | -10.9080000000 | 3.8710000000  |
| N13       | -0.0610000000 | -2.3460000000  | -0.2840000000 |
| N14       | 1.1090000000  | -1.1310000000  | -1.7010000000 |
| N15       | -1.9160000000 | -4.2600000000  | -1.3370000000 |
| N16       | -2.1420000000 | -4.4420000000  | -3.5200000000 |
| N17       | 0.4810000000  | -7.4220000000  | 4.3080000000  |
| N18       | 1.3470000000  | -9.0550000000  | 5.4910000000  |
| N19       | -0.5440000000 | -8.0240000000  | 1.7130000000  |
| N20       | -1.0120000000 | -10.1300000000 | 1.2410000000  |
| C21       | -0.6310000000 | -2.5760000000  | -2.7840000000 |
| C22       | 0.4460000000  | -9.7740000000  | 3.2560000000  |
| C23       | 1.2010000000  | -5.2020000000  | 0.7520000000  |
| C24       | -3.1820000000 | -5.6500000000  | 2.4490000000  |
| C25       | -0.3770000000 | -3.2980000000  | 3.6320000000  |
| C26       | -3.8650000000 | -1.9090000000  | 1.5100000000  |
| C27       | 0.1200000000  | -2.0510000000  | -1.5580000000 |
| C28       | 1.5610000000  | -0.8210000000  | -0.4440000000 |
| C29       | 0.8530000000  | -1.5770000000  | 0.4100000000  |
| C30       | 1.6190000000  | -0.4660000000  | -2.9070000000 |
| C31       | -1.5390000000 | -3.7620000000  | -2.4970000000 |
| C32       | -2.9230000000 | -5.4120000000  | -2.9590000000 |
| C33       | -2.7810000000 | -5.2940000000  | -1.6260000000 |
| C34       | -2.0170000000 | -4.2710000000  | -4.9650000000 |
| C35       | 0.7430000000  | -8.7200000000  | 4.3250000000  |
| C36       | 1.4610000000  | -7.9160000000  | 6.2450000000  |
| C37       | 0.9390000000  | -6.9200000000  | 5.5070000000  |
| C38       | 1.8480000000  | -10.3560000000 | 5.9550000000  |
| C39       | -0.4350000000 | -9.2790000000  | 2.1250000000  |
| C40       | -1.5150000000 | -9.3660000000  | 0.2210000000  |
| C41       | -1.2220000000 | -8.0740000000  | 0.5120000000  |
| C42       | -1.1560000000 | -11.5880000000 | 1.2880000000  |
| C43       | 1.1450000000  | -4.0520000000  | -3.4320000000 |
| C44       | -1.3900000000 | -10.6540000000 | 4.5020000000  |
| C45       | -1.4910000000 | -1.4400000000  | -3.3490000000 |
| C46       | -2.5010000000 | -0.9300000000  | -2.5490000000 |
| C47       | -3.3040000000 | 0.0940000000   | -3.0130000000 |
| C48       | -3.1130000000 | 0.6090000000   | -4.2750000000 |

|     |               |                |               |
|-----|---------------|----------------|---------------|
| C49 | -2.1140000000 | 0.0870000000   | -5.0870000000 |
| C50 | -1.3060000000 | -0.9290000000  | -4.6190000000 |
| C51 | 1.7660000000  | -10.2290000000 | 2.5920000000  |
| C52 | 2.1810000000  | -11.5500000000 | 2.5870000000  |
| C53 | 3.3090000000  | -11.9260000000 | 1.8880000000  |
| C54 | 4.0370000000  | -10.9930000000 | 1.1850000000  |
| C55 | 3.6500000000  | -9.6570000000  | 1.1960000000  |
| C56 | 2.5130000000  | -9.2810000000  | 1.8930000000  |
| H57 | 1.5250000000  | -4.7030000000  | 0.0100000000  |
| H58 | -4.0970000000 | -5.7920000000  | 2.6570000000  |
| H59 | -0.2130000000 | -2.6480000000  | 4.3040000000  |
| H60 | -3.8780000000 | -2.4830000000  | 2.2660000000  |
| H61 | 2.2400000000  | -0.1960000000  | -0.2210000000 |
| H62 | 0.9640000000  | -1.5820000000  | 1.3540000000  |
| H63 | -3.4610000000 | -6.0470000000  | -3.4180000000 |
| H64 | -3.2120000000 | -5.8400000000  | -0.9800000000 |
| H65 | 1.8380000000  | -7.8440000000  | 7.1150000000  |
| H66 | 0.8920000000  | -6.0090000000  | 5.7730000000  |
| H67 | -1.9800000000 | -9.6800000000  | -0.5440000000 |
| H68 | -1.4470000000 | -7.3230000000  | -0.0250000000 |
| H69 | -2.6420000000 | -1.2880000000  | -1.6810000000 |
| H70 | -3.9870000000 | 0.4480000000   | -2.4570000000 |
| H71 | -3.6590000000 | 1.3190000000   | -4.5900000000 |
| H72 | -1.9830000000 | 0.4330000000   | -5.9630000000 |
| H73 | -0.6180000000 | -1.2780000000  | -5.1720000000 |
| H74 | 1.6860000000  | -12.2010000000 | 3.0690000000  |
| H75 | 3.5880000000  | -12.8340000000 | 1.8920000000  |
| H76 | 4.8060000000  | -11.2570000000 | 0.6920000000  |
| H77 | 4.1620000000  | -9.0060000000  | 0.7290000000  |
| H78 | 2.2420000000  | -8.3690000000  | 1.8940000000  |
| H79 | 2.1810000000  | -10.2690000000 | 6.8410000000  |
| H80 | 1.7120000000  | -3.7970000000  | -2.7110000000 |
| H81 | -1.6550000000 | -11.4190000000 | 4.9950000000  |
| H82 | -2.6430000000 | -4.8310000000  | -5.4050000000 |
| H83 | -1.5660000000 | -11.8910000000 | 0.4870000000  |
| H84 | 0.8970000000  | -0.2840000000  | -3.4970000000 |
| H85 | 2.0400000000  | 0.3510000000   | -2.6640000000 |
| H86 | 2.2490000000  | -1.0300000000  | -3.3380000000 |
| H87 | -2.1850000000 | -3.3640000000  | -5.1920000000 |
| H88 | -1.1370000000 | -4.5060000000  | -5.2360000000 |
| H89 | 1.1430000000  | -10.9890000000 | 5.9420000000  |
| H90 | 2.5490000000  | -10.6470000000 | 5.3820000000  |
| H91 | -1.6980000000 | -11.8280000000 | 2.0320000000  |
| H92 | -0.3000000000 | -11.9880000000 | 1.3790000000  |
| H93 | 0.6100000000  | -4.7900000000  | -3.1660000000 |
| H94 | 1.6790000000  | -4.2990000000  | -4.1790000000 |
| H95 | -1.3060000000 | -9.9110000000  | 5.0890000000  |
| H96 | -2.0400000000 | -10.4610000000 | 3.8380000000  |

## 2. JOHCEP

|     |               |              |               |
|-----|---------------|--------------|---------------|
| Fe1 | 6.6382000000  | 4.8662000000 | 6.9818000000  |
| B2  | 8.6672000000  | 7.2069000000 | 6.6453000000  |
| H3  | 9.3137000000  | 7.9631000000 | 6.5406000000  |
| C4  | 9.1633000000  | 7.2828000000 | 9.2481000000  |
| C5  | 7.4761000000  | 5.6088000000 | 9.7243000000  |
| H6  | 6.8890000000  | 4.9655000000 | 10.1027000000 |
| C7  | 6.8908000000  | 8.7388000000 | 5.5156000000  |
| C8  | 5.1516000000  | 7.0415000000 | 5.6497000000  |
| H9  | 4.3673000000  | 6.5071000000 | 5.6008000000  |
| C10 | 10.2783000000 | 5.8288000000 | 5.1679000000  |
| C11 | 8.8404000000  | 3.8657000000 | 5.2294000000  |
| H12 | 8.4192000000  | 3.0190000000 | 5.1428000000  |
| N13 | 7.5688000000  | 5.7918000000 | 8.4550000000  |
| N14 | 8.4912000000  | 6.8079000000 | 8.1589000000  |
| N15 | 6.2653000000  | 6.6191000000 | 6.1887000000  |
| N16 | 7.2705000000  | 7.5806000000 | 6.1105000000  |

|     |               |               |               |
|-----|---------------|---------------|---------------|
| N17 | 8.3353000000  | 4.8195000000  | 5.9513000000  |
| N18 | 9.1469000000  | 5.9505000000  | 5.9038000000  |
| S19 | 8.4731000000  | 6.5933000000  | 10.6693000000 |
| S20 | 10.4377000000 | 8.3306000000  | 9.2790000000  |
| S21 | 5.2272000000  | 8.6219000000  | 5.0444000000  |
| S22 | 7.7928000000  | 10.0958000000 | 5.1933000000  |
| S23 | 10.3031000000 | 4.2344000000  | 4.4512000000  |
| S24 | 11.4961000000 | 6.9440000000  | 4.9660000000  |
| B25 | 4.6092000000  | 2.5256000000  | 7.3183000000  |
| H26 | 3.9627000000  | 1.7694000000  | 7.4231000000  |
| C27 | 4.1131000000  | 2.4497000000  | 4.7155000000  |
| C28 | 5.8003000000  | 4.1237000000  | 4.2394000000  |
| H29 | 6.3874000000  | 4.7670000000  | 3.8609000000  |
| C30 | 6.3857000000  | 0.9937000000  | 8.4480000000  |
| C31 | 8.1248000000  | 2.6910000000  | 8.3139000000  |
| H32 | 8.9091000000  | 3.2254000000  | 8.3628000000  |
| C33 | 2.9981000000  | 3.9037000000  | 8.7957000000  |
| C34 | 4.4360000000  | 5.8668000000  | 8.7342000000  |
| H35 | 4.8572000000  | 6.7135000000  | 8.8208000000  |
| N36 | 5.7076000000  | 3.9407000000  | 5.5086000000  |
| N37 | 4.7852000000  | 2.9246000000  | 5.8047000000  |
| N38 | 7.0111000000  | 3.1134000000  | 7.7749000000  |
| N39 | 6.0059000000  | 2.1519000000  | 7.8531000000  |
| N40 | 4.9411000000  | 4.9130000000  | 8.0123000000  |
| N41 | 4.1295000000  | 3.7820000000  | 8.0598000000  |
| S42 | 4.8033000000  | 3.1392000000  | 3.2943000000  |
| S43 | 2.8387000000  | 1.4019000000  | 4.6847000000  |
| S44 | 8.0492000000  | 1.1106000000  | 8.9193000000  |
| S45 | 5.4836000000  | -0.3633000000 | 8.7703000000  |
| S46 | 2.9733000000  | 5.4981000000  | 9.5124000000  |
| S47 | 1.7803000000  | 2.7885000000  | 8.9976000000  |

### 3. VUNMIA

|     |               |               |               |
|-----|---------------|---------------|---------------|
| Fe1 | 0.5340000000  | 1.7770000000  | 1.0750000000  |
| O2  | -1.3630000000 | 1.1510000000  | 1.1280000000  |
| O3  | 1.5000000000  | 1.0300000000  | -0.6890000000 |
| C4  | -1.9710000000 | 0.0400000000  | 1.1100000000  |
| C5  | -3.3700000000 | 0.0380000000  | 1.6800000000  |
| N6  | 2.3870000000  | 3.0310000000  | 1.4420000000  |
| N7  | 0.2420000000  | 3.4960000000  | -0.1610000000 |
| N8  | 0.1720000000  | 2.6880000000  | 3.1050000000  |
| N9  | 1.7810000000  | 0.4250000000  | 2.1820000000  |
| C10 | 1.3170000000  | 4.2550000000  | -0.4070000000 |
| C11 | 1.2420000000  | 5.3720000000  | -1.2110000000 |
| C12 | 0.0510000000  | 5.6740000000  | -1.8420000000 |
| C13 | -1.0510000000 | 4.8790000000  | -1.6170000000 |
| C14 | -0.9220000000 | 3.8110000000  | -0.7560000000 |
| C15 | 1.1790000000  | 3.4480000000  | 3.5800000000  |
| C16 | 1.3000000000  | 3.7770000000  | 4.9110000000  |
| C17 | 0.3340000000  | 3.3400000000  | 5.8030000000  |
| C18 | -0.7220000000 | 2.5970000000  | 5.3220000000  |
| C19 | -0.7540000000 | 2.2760000000  | 3.9840000000  |
| C20 | 2.9790000000  | 0.9170000000  | 2.5740000000  |
| C21 | 3.7130000000  | 0.3120000000  | 3.5830000000  |
| C22 | 3.2220000000  | -0.8340000000 | 4.1780000000  |
| C23 | 2.0260000000  | -1.3700000000 | 3.7450000000  |
| C24 | 1.3330000000  | -0.7050000000 | 2.7560000000  |
| C25 | 2.6300000000  | 3.7690000000  | 0.1860000000  |
| C26 | 2.1210000000  | 3.9930000000  | 2.5360000000  |
| C27 | 3.4790000000  | 2.1110000000  | 1.7970000000  |
| H28 | 2.0030000000  | 5.9300000000  | -1.3300000000 |
| H29 | -0.0080000000 | 6.4230000000  | -2.4250000000 |
| H30 | -1.8790000000 | 5.0610000000  | -2.0470000000 |
| H31 | -1.6870000000 | 3.2770000000  | -0.5770000000 |
| H32 | 2.0350000000  | 4.2980000000  | 5.2150000000  |
| H33 | 0.3980000000  | 3.5470000000  | 6.7290000000  |

|      |               |               |               |
|------|---------------|---------------|---------------|
| H34  | -1.4170000000 | 2.3100000000  | 5.9040000000  |
| H35  | -1.4670000000 | 1.7340000000  | 3.6670000000  |
| H36  | 4.5430000000  | 0.6820000000  | 3.8610000000  |
| H37  | 3.7060000000  | -1.2520000000 | 4.8820000000  |
| H38  | 1.6900000000  | -2.1760000000 | 4.1190000000  |
| H39  | 0.5030000000  | -1.0620000000 | 2.4660000000  |
| H40  | 2.9440000000  | 4.2120000000  | 2.9550000000  |
| H41  | 1.7370000000  | 4.7780000000  | 2.1630000000  |
| H42  | 3.1880000000  | 4.5180000000  | 0.3650000000  |
| H43  | 3.0600000000  | 3.1950000000  | -0.4360000000 |
| H44  | 3.8960000000  | 1.8070000000  | 0.9990000000  |
| H45  | 4.1150000000  | 2.5780000000  | 2.3260000000  |
| H46  | -3.6830000000 | 0.9640000000  | 1.8190000000  |
| H47  | -3.3510000000 | -0.4210000000 | 2.4350000000  |
| H48  | -3.9070000000 | -0.3380000000 | 1.0030000000  |
| C49  | 1.9710000000  | -0.0400000000 | -1.1100000000 |
| O50  | -1.5000000000 | -1.0300000000 | 0.6890000000  |
| O51  | 1.3630000000  | -1.1510000000 | -1.1280000000 |
| C52  | 3.3700000000  | -0.0380000000 | -1.6800000000 |
| Fe53 | -0.5340000000 | -1.7770000000 | -1.0750000000 |
| H54  | 3.6830000000  | -0.9640000000 | -1.8190000000 |
| H55  | 3.3510000000  | 0.4210000000  | -2.4350000000 |
| H56  | 3.9070000000  | 0.3380000000  | -1.0030000000 |
| N57  | -2.3870000000 | -3.0310000000 | -1.4420000000 |
| N58  | -0.2420000000 | -3.4960000000 | 0.1610000000  |
| N59  | -0.1720000000 | -2.6880000000 | -3.1050000000 |
| N60  | -1.7810000000 | -0.4250000000 | -2.1820000000 |
| C61  | -2.6300000000 | -3.7690000000 | -0.1860000000 |
| C62  | -2.1210000000 | -3.9930000000 | -2.5360000000 |
| C63  | -3.4790000000 | -2.1110000000 | -1.7970000000 |
| C64  | -1.3170000000 | -4.2550000000 | 0.4070000000  |
| C65  | 0.9220000000  | -3.8110000000 | 0.7560000000  |
| C66  | -1.1790000000 | -3.4480000000 | -3.5800000000 |
| C67  | 0.7540000000  | -2.2760000000 | -3.9840000000 |
| C68  | -2.9790000000 | -0.9170000000 | -2.5740000000 |
| C69  | -1.3330000000 | 0.7050000000  | -2.7560000000 |
| H70  | -3.1880000000 | -4.5180000000 | -0.3650000000 |
| H71  | -3.0600000000 | -3.1950000000 | 0.4360000000  |
| H72  | -2.9440000000 | -4.2120000000 | -2.9550000000 |
| H73  | -1.7370000000 | -4.7780000000 | -2.1630000000 |
| H74  | -3.8960000000 | -1.8070000000 | -0.9990000000 |
| H75  | -4.1150000000 | -2.5780000000 | -2.3260000000 |
| C76  | -1.2420000000 | -5.3720000000 | 1.2110000000  |
| C77  | 1.0510000000  | -4.8790000000 | 1.6170000000  |
| H78  | 1.6870000000  | -3.2770000000 | 0.5770000000  |
| C79  | -1.3000000000 | -3.7770000000 | -4.9110000000 |
| C80  | 0.7220000000  | -2.5970000000 | -5.3220000000 |
| H81  | 1.4670000000  | -1.7340000000 | -3.6670000000 |
| C82  | -3.7130000000 | -0.3120000000 | -3.5830000000 |
| C83  | -2.0260000000 | 1.3700000000  | -3.7450000000 |
| H84  | -0.5030000000 | 1.0620000000  | -2.4660000000 |
| C85  | -0.0510000000 | -5.6740000000 | 1.8420000000  |
| H86  | -2.0030000000 | -5.9300000000 | 1.3300000000  |
| H87  | 1.8790000000  | -5.0610000000 | 2.0470000000  |
| C88  | -0.3340000000 | -3.3400000000 | -5.8030000000 |
| H89  | -2.0350000000 | -4.2980000000 | -5.2150000000 |
| H90  | 1.4170000000  | -2.3100000000 | -5.9040000000 |
| C91  | -3.2220000000 | 0.8340000000  | -4.1780000000 |
| H92  | -4.5430000000 | -0.6820000000 | -3.8610000000 |
| H93  | -1.6900000000 | 2.1760000000  | -4.1190000000 |
| H94  | 0.0080000000  | -6.4230000000 | 2.4250000000  |
| H95  | -0.3980000000 | -3.5470000000 | -6.7290000000 |
| H96  | -3.7060000000 | 1.2520000000  | -4.8820000000 |

#### 4. YUZKAF10

|     |              |               |              |
|-----|--------------|---------------|--------------|
| Fe1 | 5.7006000000 | 17.0942000000 | 6.4105000000 |
|-----|--------------|---------------|--------------|

|     |               |               |               |
|-----|---------------|---------------|---------------|
| Fe2 | 4.0966000000  | 18.3062000000 | 3.4155000000  |
| O3  | 7.7986000000  | 16.9022000000 | 6.6265000000  |
| O4  | 5.8026000000  | 18.3402000000 | 8.1035000000  |
| O5  | 7.9976000000  | 18.4682000000 | 8.5715000000  |
| O6  | 5.9096000000  | 18.8412000000 | 5.0885000000  |
| O7  | 5.2366000000  | 19.9962000000 | 3.3635000000  |
| O8  | 3.6666000000  | 17.3552000000 | 6.2645000000  |
| O9  | 2.6496000000  | 18.5942000000 | 4.7155000000  |
| O10 | 1.9096000000  | 14.6652000000 | 7.1115000000  |
| O11 | -0.2024000000 | 17.0532000000 | 3.8905000000  |
| O12 | 5.8746000000  | 15.8012000000 | 4.7075000000  |
| O13 | 5.2636000000  | 16.8282000000 | 2.8105000000  |
| O14 | 4.7576000000  | 12.5382000000 | 4.4235000000  |
| O15 | 3.6066000000  | 14.8822000000 | 0.7465000000  |
| N16 | 5.2516000000  | 15.4322000000 | 7.6755000000  |
| N17 | 4.7126000000  | 13.4132000000 | 8.3415000000  |
| N18 | 2.9056000000  | 18.3182000000 | 1.7445000000  |
| N19 | 1.1636000000  | 18.6912000000 | 0.4045000000  |
| N20 | 0.8346000000  | 15.8472000000 | 5.5025000000  |
| N21 | 4.2346000000  | 13.7782000000 | 2.6345000000  |
| C22 | 8.4716000000  | 15.4452000000 | 6.9495000000  |
| C23 | 5.0946000000  | 14.1852000000 | 7.3345000000  |
| C24 | 4.5786000000  | 14.2502000000 | 9.4225000000  |
| C25 | 4.8946000000  | 15.4692000000 | 8.9935000000  |
| C26 | 1.6156000000  | 18.6122000000 | 1.6635000000  |
| C27 | 2.2306000000  | 18.4532000000 | -0.3805000000 |
| C28 | 3.3046000000  | 18.2262000000 | 0.4485000000  |
| C29 | 6.7916000000  | 18.6712000000 | 8.8305000000  |
| C30 | 6.4946000000  | 19.3142000000 | 10.2075000000 |
| C31 | 5.1266000000  | 19.4112000000 | 10.6365000000 |
| C32 | 4.8706000000  | 19.9812000000 | 11.8805000000 |
| C33 | 5.8746000000  | 20.3802000000 | 12.6805000000 |
| C34 | 7.1526000000  | 20.3422000000 | 12.2365000000 |
| C35 | 7.4886000000  | 19.7792000000 | 11.0075000000 |
| C36 | 5.9896000000  | 19.8482000000 | 4.3585000000  |
| C37 | 6.9896000000  | 20.8952000000 | 4.6395000000  |
| C38 | 7.9416000000  | 20.7552000000 | 5.6615000000  |
| C39 | 8.9166000000  | 21.7282000000 | 5.8395000000  |
| C40 | 8.9416000000  | 22.8882000000 | 5.1135000000  |
| C41 | 7.9726000000  | 23.0432000000 | 4.1505000000  |
| C42 | 7.0136000000  | 22.0212000000 | 3.9145000000  |
| C43 | 2.7736000000  | 18.1332000000 | 5.8985000000  |
| C44 | 1.2126000000  | 15.6162000000 | 6.8605000000  |
| C45 | 0.0046000000  | 16.9582000000 | 5.0985000000  |
| C46 | 2.4816000000  | 19.9592000000 | 7.4675000000  |
| C47 | 0.5676000000  | 15.7332000000 | 9.2005000000  |
| C48 | -1.8534000000 | 18.3762000000 | 5.6615000000  |
| C49 | 1.7976000000  | 18.7012000000 | 6.9495000000  |
| C50 | 1.6406000000  | 17.7042000000 | 8.1345000000  |
| C51 | 0.6716000000  | 16.5392000000 | 7.8825000000  |
| C52 | -0.6824000000 | 17.0842000000 | 7.4235000000  |
| C53 | -0.5214000000 | 17.8722000000 | 6.1645000000  |
| C54 | 0.4256000000  | 19.0382000000 | 6.3865000000  |
| C55 | 5.9686000000  | 16.0022000000 | 3.4845000000  |
| C56 | 4.4766000000  | 14.3102000000 | 1.3525000000  |
| C57 | 5.1286000000  | 13.0432000000 | 3.4105000000  |
| C58 | 8.3036000000  | 16.2542000000 | 2.9515000000  |
| C59 | 5.7796000000  | 14.1032000000 | -0.7805000000 |
| C60 | 7.0456000000  | 11.4592000000 | 3.3515000000  |
| C61 | 7.1176000000  | 15.3422000000 | 2.6995000000  |
| C62 | 6.8306000000  | 15.2262000000 | 1.2045000000  |
| C63 | 5.9356000000  | 14.1242000000 | 0.7895000000  |
| C64 | 6.4376000000  | 12.7942000000 | 1.2635000000  |
| C65 | 6.5286000000  | 12.8252000000 | 2.7885000000  |
| C66 | 7.4346000000  | 13.9602000000 | 3.2325000000  |
| C67 | 2.5096000000  | 14.8132000000 | 4.0325000000  |

|      |               |               |               |
|------|---------------|---------------|---------------|
| C68  | 1.2226000000  | 14.8752000000 | 4.5215000000  |
| C69  | 0.2646000000  | 13.9502000000 | 4.1215000000  |
| C70  | 0.6696000000  | 12.9912000000 | 3.1885000000  |
| C71  | 1.9256000000  | 12.9482000000 | 2.6405000000  |
| C72  | 2.8346000000  | 13.8802000000 | 3.0845000000  |
| C73  | -1.1224000000 | 13.9422000000 | 4.6985000000  |
| C74  | 2.2786000000  | 11.8982000000 | 1.6035000000  |
| H75  | 4.5526000000  | 12.4942000000 | 8.3265000000  |
| H76  | 0.2826000000  | 18.8762000000 | 0.1235000000  |
| H77  | 8.1556000000  | 15.1512000000 | 7.7495000000  |
| H78  | 8.2556000000  | 14.8842000000 | 6.2245000000  |
| H79  | 9.3956000000  | 15.0982000000 | 6.9645000000  |
| H80  | 5.2446000000  | 13.8652000000 | 6.4615000000  |
| H81  | 4.3026000000  | 14.0132000000 | 10.2965000000 |
| H82  | 4.8976000000  | 16.2542000000 | 9.5415000000  |
| H83  | 1.0636000000  | 18.7332000000 | 2.4185000000  |
| H84  | 2.2436000000  | 18.4472000000 | -1.3285000000 |
| H85  | 4.1826000000  | 18.0322000000 | 0.1525000000  |
| H86  | 4.4126000000  | 19.1152000000 | 10.0895000000 |
| H87  | 3.9706000000  | 20.0832000000 | 12.1625000000 |
| H88  | 5.6786000000  | 20.6912000000 | 13.5685000000 |
| H89  | 7.8386000000  | 20.7142000000 | 12.7695000000 |
| H90  | 8.3906000000  | 19.7122000000 | 10.7255000000 |
| H91  | 7.9176000000  | 19.9962000000 | 6.2245000000  |
| H92  | 9.5866000000  | 21.5992000000 | 6.5055000000  |
| H93  | 9.5956000000  | 23.5672000000 | 5.2765000000  |
| H94  | 7.9446000000  | 23.8352000000 | 3.6175000000  |
| H95  | 6.3766000000  | 22.1592000000 | 3.2325000000  |
| H96  | 3.3176000000  | 19.7122000000 | 7.8525000000  |
| H97  | 2.6266000000  | 20.5712000000 | 6.7575000000  |
| H98  | 1.9376000000  | 20.3702000000 | 8.1345000000  |
| H99  | 0.2166000000  | 16.2772000000 | 9.8965000000  |
| H100 | -0.0154000000 | 14.9862000000 | 9.0675000000  |
| H101 | 1.4326000000  | 15.4132000000 | 9.4525000000  |
| H102 | -1.7244000000 | 18.8472000000 | 4.8465000000  |
| H103 | -2.4414000000 | 17.6382000000 | 5.5135000000  |
| H104 | -2.2294000000 | 18.9642000000 | 6.3125000000  |
| H105 | 2.5106000000  | 17.3532000000 | 8.3265000000  |
| H106 | 1.3386000000  | 18.2052000000 | 8.9045000000  |
| H107 | -1.2744000000 | 16.3552000000 | 7.2605000000  |
| H108 | -1.0544000000 | 17.6472000000 | 8.0895000000  |
| H109 | -0.0014000000 | 19.6532000000 | 6.9945000000  |
| H110 | 0.5436000000  | 19.4762000000 | 5.5425000000  |
| H111 | 8.4896000000  | 16.3022000000 | 3.8845000000  |
| H112 | 9.0696000000  | 15.9052000000 | 2.4925000000  |
| H113 | 7.4896000000  | 17.1242000000 | 2.6255000000  |
| H114 | 6.6396000000  | 13.9882000000 | -1.1795000000 |
| H115 | 5.2086000000  | 13.3762000000 | -1.0315000000 |
| H116 | 5.4026000000  | 14.9212000000 | -1.0765000000 |
| H117 | 7.0846000000  | 11.4992000000 | 4.2995000000  |
| H118 | 6.4466000000  | 10.7752000000 | 3.0845000000  |
| H119 | 7.9106000000  | 11.2922000000 | 3.0105000000  |
| H120 | 6.4196000000  | 16.0352000000 | 0.9225000000  |
| H121 | 7.6456000000  | 15.1132000000 | 0.7455000000  |
| H122 | 5.8376000000  | 12.1102000000 | 0.9965000000  |
| H123 | 7.2926000000  | 12.6282000000 | 0.8935000000  |
| H124 | 8.3266000000  | 13.7392000000 | 2.9815000000  |
| H125 | 7.3856000000  | 13.9992000000 | 4.1805000000  |
| H126 | 3.1636000000  | 15.4282000000 | 4.3585000000  |
| H127 | 0.0286000000  | 12.3332000000 | 2.9075000000  |
| H128 | -1.2124000000 | 14.6492000000 | 5.3205000000  |
| H129 | -1.7594000000 | 14.0302000000 | 3.9885000000  |
| H130 | -1.2834000000 | 13.0942000000 | 5.1285000000  |
| H131 | 2.1736000000  | 11.0362000000 | 1.9745000000  |
| H132 | 1.7036000000  | 11.9972000000 | 0.8485000000  |
| H133 | 3.1756000000  | 12.0162000000 | 1.3225000000  |

H134 8.3809000000 17.3384000000 7.3125000000

5. XIGDIA

|      |               |               |               |
|------|---------------|---------------|---------------|
| Fe1  | 0.5270000000  | 0.8030000000  | 9.1180000000  |
| O2   | 0.8430000000  | 1.7010000000  | 10.9310000000 |
| O3   | -0.0140000000 | -0.5600000000 | 7.6230000000  |
| O4   | 1.8760000000  | -0.6380000000 | 9.7000000000  |
| O5   | -1.1830000000 | 2.0020000000  | 8.8810000000  |
| N6   | 1.6000000000  | 2.0140000000  | 7.7660000000  |
| C7   | 2.9160000000  | 2.0700000000  | 7.7980000000  |
| H8   | 3.3510000000  | 1.5850000000  | 8.4890000000  |
| C9   | 3.7130000000  | 2.7590000000  | 6.9270000000  |
| H10  | 4.6580000000  | 2.7750000000  | 7.0240000000  |
| C11  | 3.0920000000  | 3.4200000000  | 5.9210000000  |
| H12  | 3.6000000000  | 3.9070000000  | 5.2810000000  |
| C13  | 1.7640000000  | 3.3840000000  | 5.8320000000  |
| H14  | 1.3150000000  | 3.8700000000  | 5.1500000000  |
| C15  | 1.0550000000  | 2.6410000000  | 6.7300000000  |
| H16  | 0.1160000000  | 2.5680000000  | 6.6060000000  |
| C17  | -0.0370000000 | 1.4380000000  | 11.7920000000 |
| C18  | -0.0580000000 | 2.2610000000  | 13.0570000000 |
| C19  | 0.2460000000  | 3.6270000000  | 13.0350000000 |
| C20  | 0.1600000000  | 4.3660000000  | 14.2130000000 |
| H21  | 0.3100000000  | 5.3030000000  | 14.1780000000 |
| C22  | -0.1370000000 | 3.7840000000  | 15.4350000000 |
| C23  | -0.3970000000 | 2.4240000000  | 15.4450000000 |
| H24  | -0.5890000000 | 2.0030000000  | 16.2750000000 |
| C25  | -0.3860000000 | 1.6490000000  | 14.2920000000 |
| C26  | -0.1800000000 | 4.5800000000  | 16.7540000000 |
| C27  | 0.7040000000  | 4.3500000000  | 11.7570000000 |
| H28  | 1.6320000000  | 4.0720000000  | 11.5560000000 |
| H29  | 0.1340000000  | 4.0490000000  | 11.0050000000 |
| C30  | -0.6420000000 | 0.1470000000  | 14.4110000000 |
| H31  | -1.2210000000 | -0.1330000000 | 13.6590000000 |
| H32  | 0.2210000000  | -0.3280000000 | 14.3170000000 |
| C33  | 1.4380000000  | -1.7580000000 | 10.0820000000 |
| C34  | 2.4190000000  | -2.8910000000 | 10.2050000000 |
| C35  | 2.5650000000  | -3.5520000000 | 11.4290000000 |
| C36  | 3.4400000000  | -4.6220000000 | 11.5100000000 |
| H37  | 3.5440000000  | -5.0610000000 | 12.3450000000 |
| C38  | 4.1710000000  | -5.0770000000 | 10.4280000000 |
| C39  | 4.0070000000  | -4.3960000000 | 9.2310000000  |
| H40  | 4.4970000000  | -4.6900000000 | 8.4720000000  |
| C41  | 3.1670000000  | -3.3080000000 | 9.0890000000  |
| C42  | 5.1000000000  | -6.2890000000 | 10.5220000000 |
| C43  | 3.0120000000  | -2.6270000000 | 7.7280000000  |
| H44  | 2.2120000000  | -3.0040000000 | 7.2820000000  |
| H45  | 2.8400000000  | -1.6650000000 | 7.8810000000  |
| O46  | -0.9340000000 | 0.5600000000  | 11.6300000000 |
| Fe47 | -1.4750000000 | -0.8030000000 | 10.1360000000 |
| O48  | -1.7910000000 | -1.7010000000 | 8.3220000000  |
| C49  | -0.9110000000 | -1.4380000000 | 7.4610000000  |
| O50  | 0.2350000000  | -2.0020000000 | 10.3720000000 |
| O51  | -2.8240000000 | 0.6380000000  | 9.5540000000  |
| C52  | -2.3860000000 | 1.7580000000  | 9.1720000000  |
| C53  | -3.3670000000 | 2.8910000000  | 9.0480000000  |
| C54  | -3.5130000000 | 3.5520000000  | 7.8240000000  |
| C55  | -4.3880000000 | 4.6220000000  | 7.7430000000  |
| H56  | -4.4920000000 | 5.0610000000  | 6.9080000000  |
| C57  | -5.1190000000 | 5.0770000000  | 8.8260000000  |
| C58  | -4.9550000000 | 4.3960000000  | 10.0230000000 |
| H59  | -5.4450000000 | 4.6900000000  | 10.7820000000 |
| C60  | -4.1150000000 | 3.3080000000  | 10.1650000000 |
| C61  | -3.9600000000 | 2.6270000000  | 11.5250000000 |
| H62  | -3.1600000000 | 3.0040000000  | 11.9720000000 |
| H63  | -3.7880000000 | 1.6650000000  | 11.3730000000 |

|      |               |               |               |
|------|---------------|---------------|---------------|
| C64  | -6.0480000000 | 6.2890000000  | 8.7320000000  |
| C65  | -2.7360000000 | 3.1120000000  | 6.5870000000  |
| H66  | -2.5400000000 | 2.1440000000  | 6.6600000000  |
| H67  | -1.8700000000 | 3.5930000000  | 6.5670000000  |
| N68  | -2.5480000000 | -2.0140000000 | 11.4880000000 |
| C69  | -3.8640000000 | -2.0700000000 | 11.4560000000 |
| H70  | -4.2990000000 | -1.5850000000 | 10.7650000000 |
| C71  | -4.6610000000 | -2.7590000000 | 12.3260000000 |
| H72  | -5.6060000000 | -2.7750000000 | 12.2300000000 |
| C73  | -4.0400000000 | -3.4200000000 | 13.3330000000 |
| H74  | -4.5480000000 | -3.9070000000 | 13.9720000000 |
| C75  | -2.7120000000 | -3.3840000000 | 13.4220000000 |
| H76  | -2.2630000000 | -3.8700000000 | 14.1030000000 |
| C77  | -2.0030000000 | -2.6410000000 | 12.5240000000 |
| H78  | -1.0640000000 | -2.5680000000 | 12.6480000000 |
| C79  | -0.8900000000 | -2.2610000000 | 6.1960000000  |
| C80  | -1.1950000000 | -3.6270000000 | 6.2190000000  |
| C81  | -1.1080000000 | -4.3660000000 | 5.0400000000  |
| H82  | -1.2580000000 | -5.3030000000 | 5.0750000000  |
| C83  | -0.8110000000 | -3.7840000000 | 3.8190000000  |
| C84  | -0.5510000000 | -2.4240000000 | 3.8090000000  |
| H85  | -0.3590000000 | -2.0030000000 | 2.9790000000  |
| C86  | -0.5620000000 | -1.6490000000 | 4.9620000000  |
| C87  | -0.3060000000 | -0.1470000000 | 4.8430000000  |
| H88  | 0.2730000000  | 0.1330000000  | 5.5950000000  |
| H89  | -1.1690000000 | 0.3280000000  | 4.9370000000  |
| C90  | -0.7680000000 | -4.5800000000 | 2.5000000000  |
| C91  | -1.6520000000 | -4.3500000000 | 7.4970000000  |
| H92  | -2.5800000000 | -4.0720000000 | 7.6980000000  |
| H93  | -1.0820000000 | -4.0490000000 | 8.2480000000  |
| H94  | 5.5696000000  | -6.4635000000 | 9.5539000000  |
| H95  | 5.8700000000  | -6.1001000000 | 11.2700000000 |
| H96  | 4.5232000000  | -7.1682000000 | 10.8092000000 |
| H97  | 3.8685000000  | -2.8709000000 | 7.0995000000  |
| H98  | -4.8170000000 | 2.8698000000  | 12.1533000000 |
| H99  | -3.3544000000 | 3.2514000000  | 5.7003000000  |
| H100 | 0.2411000000  | 0.0571000000  | 3.9226000000  |
| H101 | 0.7250000000  | 5.4252000000  | 11.9349000000 |
| H102 | -1.1891000000 | -0.0571000000 | 15.3314000000 |
| H103 | -0.4340000000 | 3.9099000000  | 17.5753000000 |
| H104 | 0.7958000000  | 5.0286000000  | 16.9403000000 |
| H105 | -0.9323000000 | 5.3654000000  | 16.6807000000 |
| H106 | -6.5174000000 | 6.4636000000  | 9.7001000000  |
| H107 | -5.4712000000 | 7.1681000000  | 8.4446000000  |
| H108 | -6.8182000000 | 6.1000000000  | 7.9842000000  |
| C109 | 1.6808000000  | -3.1611000000 | 12.6149000000 |
| H110 | 1.9345000000  | -3.7783000000 | 13.4768000000 |
| H111 | 1.8436000000  | -2.1115000000 | 12.8597000000 |
| H112 | 0.6337000000  | -3.3148000000 | 12.3542000000 |
| H113 | -0.5139000000 | -3.9099000000 | 1.6787000000  |
| H114 | -0.0158000000 | -5.3654000000 | 2.5734000000  |
| H115 | -1.7438000000 | -5.0285000000 | 2.3137000000  |
| H116 | -1.6726000000 | -5.4252000000 | 7.3192000000  |

## 6. YEQPOA

|     |              |               |              |
|-----|--------------|---------------|--------------|
| Fe1 | 3.4825000000 | 0.9215000000  | 3.5624000000 |
| N2  | 1.8929000000 | 0.1560000000  | 4.4701000000 |
| N3  | 3.8361000000 | -0.8432000000 | 2.7198000000 |
| N4  | 5.2829000000 | 1.5321000000  | 2.9798000000 |
| N5  | 3.3205000000 | 2.5467000000  | 4.6998000000 |
| C6  | 1.8375000000 | -2.0530000000 | 3.4201000000 |
| H7  | 1.3512000000 | -2.8662000000 | 3.3450000000 |
| C8  | 5.9485000000 | -0.3667000000 | 1.5845000000 |
| H9  | 6.6047000000 | -0.7023000000 | 0.9849000000 |
| C10 | 5.3117000000 | 3.7630000000  | 3.9791000000 |
| H11 | 5.7837000000 | 4.5860000000  | 4.0312000000 |



|     |               |               |               |
|-----|---------------|---------------|---------------|
| C12 | 1.2139000000  | 2.0665000000  | 5.8397000000  |
| H13 | 0.5486000000  | 2.4084000000  | 6.4252000000  |
| C14 | 1.0251000000  | 0.7953000000  | 5.3332000000  |
| C15 | 1.3311000000  | -1.0864000000 | 4.2675000000  |
| C16 | 2.9903000000  | -1.9328000000 | 2.6749000000  |
| C17 | 4.8592000000  | -1.1689000000 | 1.8526000000  |
| C18 | 6.1557000000  | 0.8862000000  | 2.1223000000  |
| C19 | 5.8494000000  | 2.7746000000  | 3.1793000000  |
| C20 | 4.1451000000  | 3.6531000000  | 4.7087000000  |
| C21 | 2.2928000000  | 2.8779000000  | 5.5613000000  |
| C22 | -0.0828000000 | -0.0606000000 | 5.6854000000  |
| C23 | 0.1171000000  | -1.2400000000 | 5.0325000000  |
| C24 | 3.4827000000  | -2.9428000000 | 1.7658000000  |
| C25 | 4.6534000000  | -2.4677000000 | 1.2563000000  |
| C26 | 7.2957000000  | 1.7178000000  | 1.8074000000  |
| C27 | 7.0956000000  | 2.9005000000  | 2.4552000000  |
| C28 | 3.6412000000  | 4.6761000000  | 5.6013000000  |
| C29 | 2.4934000000  | 4.1868000000  | 6.1422000000  |
| C30 | -1.2288000000 | 0.3179000000  | 6.5707000000  |
| H31 | -0.9061000000 | 0.9338000000  | 7.2748000000  |
| H32 | -1.5796000000 | -0.4944000000 | 7.0156000000  |
| C33 | -2.3604000000 | 0.9926000000  | 5.7924000000  |
| H34 | -3.0907000000 | 1.2176000000  | 6.4069000000  |
| H35 | -2.6911000000 | 0.3809000000  | 5.1021000000  |
| H36 | -2.0245000000 | 1.8103000000  | 5.3712000000  |
| C37 | -0.7155000000 | -2.4829000000 | 5.0869000000  |
| H38 | -1.2931000000 | -2.4449000000 | 5.8897000000  |
| H39 | -0.1161000000 | -3.2646000000 | 5.1852000000  |
| C40 | -1.5983000000 | -2.6913000000 | 3.8552000000  |
| H41 | -2.1002000000 | -3.5277000000 | 3.9509000000  |
| H42 | -1.0354000000 | -2.7369000000 | 3.0534000000  |
| H43 | -2.2248000000 | -1.9418000000 | 3.7720000000  |
| C44 | 2.8164000000  | -4.2514000000 | 1.4784000000  |
| H45 | 3.0085000000  | -4.5099000000 | 0.5425000000  |
| H46 | 1.8365000000  | -4.1388000000 | 1.5654000000  |
| C47 | 3.2698000000  | -5.3798000000 | 2.4080000000  |
| H48 | 2.7827000000  | -6.2009000000 | 2.1868000000  |
| H49 | 3.0861000000  | -5.1307000000 | 3.3380000000  |
| H50 | 4.2314000000  | -5.5307000000 | 2.2939000000  |
| C51 | 5.5865000000  | -3.1247000000 | 0.2876000000  |
| H52 | 5.8781000000  | -2.4568000000 | -0.3818000000 |
| H53 | 5.0997000000  | -3.8404000000 | -0.1930000000 |
| C54 | 6.8237000000  | -3.7281000000 | 0.9579000000  |
| H55 | 7.4079000000  | -4.1195000000 | 0.2748000000  |
| H56 | 6.5461000000  | -4.4252000000 | 1.5880000000  |
| H57 | 7.3095000000  | -3.0270000000 | 1.4400000000  |
| C58 | 8.4672000000  | 1.2911000000  | 0.9735000000  |
| H59 | 8.9510000000  | 2.0948000000  | 0.6566000000  |
| H60 | 8.1388000000  | 0.8019000000  | 0.1775000000  |
| C61 | 9.4343000000  | 0.3973000000  | 1.7471000000  |
| H62 | 10.1936000000 | 0.1638000000  | 1.1737000000  |
| H63 | 8.9717000000  | -0.4205000000 | 2.0248000000  |
| H64 | 9.7577000000  | 0.8747000000  | 2.5391000000  |
| C65 | 7.9614000000  | 4.1220000000  | 2.4434000000  |
| H66 | 7.3855000000  | 4.9206000000  | 2.3376000000  |
| H67 | 8.5633000000  | 4.0792000000  | 1.6584000000  |
| C68 | 8.8075000000  | 4.2869000000  | 3.7050000000  |
| H69 | 9.3392000000  | 5.1073000000  | 3.6367000000  |
| H70 | 9.4060000000  | 3.5162000000  | 3.8001000000  |
| H71 | 8.2198000000  | 4.3428000000  | 4.4878000000  |
| C72 | 4.2689000000  | 6.0180000000  | 5.8317000000  |
| H73 | 5.2538000000  | 5.9274000000  | 5.7855000000  |
| H74 | 4.0359000000  | 6.3322000000  | 6.7408000000  |
| C75 | 3.8142000000  | 7.0618000000  | 4.8087000000  |
| H76 | 4.2892000000  | 7.9045000000  | 4.9682000000  |
| H77 | 2.8494000000  | 7.2090000000  | 4.8978000000  |

|     |               |              |              |
|-----|---------------|--------------|--------------|
| H78 | 4.0137000000  | 6.7415000000 | 3.9044000000 |
| C79 | 1.5835000000  | 4.8507000000 | 7.1342000000 |
| H80 | 2.1095000000  | 5.4900000000 | 7.6778000000 |
| H81 | 1.2140000000  | 4.1641000000 | 7.7454000000 |
| C82 | 0.4277000000  | 5.5972000000 | 6.4645000000 |
| H83 | -0.1503000000 | 5.9896000000 | 7.1522000000 |
| H84 | -0.0926000000 | 4.9715000000 | 5.9193000000 |
| H85 | 0.7858000000  | 6.3094000000 | 5.8940000000 |
| C86 | 2.6139000000  | 1.4818000000 | 2.1951000000 |
| O87 | 2.0354000000  | 1.8047000000 | 1.2597000000 |

#### 7. DEDWUE

|     |               |               |               |
|-----|---------------|---------------|---------------|
| Fe1 | 0.0000000000  | 0.0000000000  | 0.0000000000  |
| N2  | 1.3816000000  | 1.1624000000  | -0.8256000000 |
| N3  | 0.2163000000  | 0.9707000000  | 1.7424000000  |
| C4  | 1.8505000000  | 1.1498000000  | -2.1255000000 |
| C5  | 2.8330000000  | 2.1582000000  | -2.3433000000 |
| C6  | 3.0105000000  | 2.7927000000  | -1.1582000000 |
| C7  | 2.1257000000  | 2.1748000000  | -0.2414000000 |
| C8  | 1.9399000000  | 2.5487000000  | 1.1053000000  |
| C9  | 1.0411000000  | 2.0177000000  | 1.9925000000  |
| C10 | 0.8480000000  | 2.4757000000  | 3.3722000000  |
| C11 | -0.0550000000 | 1.6927000000  | 3.9170000000  |
| C12 | -0.4787000000 | 0.7452000000  | 2.9213000000  |
| C13 | 1.4101000000  | 0.2192000000  | -3.0863000000 |
| C14 | 3.4878000000  | 2.4893000000  | -3.6450000000 |
| C15 | 2.7112000000  | 3.4823000000  | -4.4506000000 |
| C16 | 3.9164000000  | 3.9490000000  | -0.8510000000 |
| C17 | 3.1877000000  | 5.2693000000  | -0.9546000000 |
| C18 | 1.5602000000  | 3.6786000000  | 3.9278000000  |
| C19 | 0.9438000000  | 4.9999000000  | 3.4649000000  |
| C20 | -0.5882000000 | 1.7078000000  | 5.3274000000  |
| C21 | 0.1097000000  | 0.7318000000  | 6.2319000000  |
| H22 | 1.8134000000  | 0.2818000000  | -3.9502000000 |
| H23 | 2.5108000000  | 3.2316000000  | 1.4353000000  |
| H24 | 3.5761000000  | 1.6764000000  | -4.1342000000 |
| H25 | 4.3520000000  | 2.8409000000  | -3.4595000000 |
| H26 | 4.6451000000  | 3.9610000000  | -1.4844000000 |
| H27 | 4.2726000000  | 3.8530000000  | 0.0245000000  |
| H28 | 2.4666000000  | 3.6557000000  | 3.6435000000  |
| H29 | 1.5287000000  | 3.6508000000  | 4.8826000000  |
| H30 | -1.5157000000 | 1.4810000000  | 5.3120000000  |
| H31 | -0.4807000000 | 2.5741000000  | 5.6923000000  |
| H32 | 3.2902000000  | 4.2007000000  | -4.7108000000 |
| H33 | 2.3835000000  | 3.0521000000  | -5.2383000000 |
| H34 | 1.9909000000  | 3.8199000000  | -3.9502000000 |
| H35 | 3.7883000000  | 5.9564000000  | -1.2022000000 |
| H36 | 2.4894000000  | 5.1941000000  | -1.5825000000 |
| H37 | 2.8127000000  | 5.4936000000  | -0.0981000000 |
| H38 | 1.6314000000  | 5.5741000000  | 3.1528000000  |
| H39 | 0.3214000000  | 4.8383000000  | 2.7725000000  |
| H40 | 0.5033000000  | 5.4156000000  | 4.1956000000  |
| H41 | 0.1043000000  | -0.1304000000 | 5.8272000000  |
| H42 | 1.0165000000  | 1.0050000000  | 6.3547000000  |
| H43 | -0.3310000000 | 0.6851000000  | 7.0662000000  |
| N44 | -1.3816000000 | -1.1624000000 | 0.8256000000  |
| N45 | -0.2163000000 | -0.9707000000 | -1.7424000000 |
| C46 | -1.4101000000 | -0.2192000000 | 3.0863000000  |
| C47 | 0.4787000000  | -0.7452000000 | -2.9213000000 |
| C48 | -1.8505000000 | -1.1498000000 | 2.1255000000  |
| C49 | -2.1257000000 | -2.1748000000 | 0.2414000000  |
| C50 | -1.0411000000 | -2.0177000000 | -1.9925000000 |
| H51 | -1.8134000000 | -0.2818000000 | 3.9502000000  |
| C52 | 0.0550000000  | -1.6927000000 | -3.9170000000 |
| C53 | -2.8330000000 | -2.1582000000 | 2.3433000000  |
| C54 | -3.0105000000 | -2.7927000000 | 1.1582000000  |

|     |               |               |               |
|-----|---------------|---------------|---------------|
| C55 | -1.9399000000 | -2.5487000000 | -1.1053000000 |
| C56 | -0.8480000000 | -2.4757000000 | -3.3722000000 |
| C57 | 0.5882000000  | -1.7078000000 | -5.3274000000 |
| C58 | -3.4878000000 | -2.4893000000 | 3.6450000000  |
| C59 | -3.9164000000 | -3.9490000000 | 0.8510000000  |
| H60 | -2.5108000000 | -3.2316000000 | -1.4353000000 |
| C61 | -1.5602000000 | -3.6786000000 | -3.9278000000 |
| C62 | -0.1097000000 | -0.7318000000 | -6.2319000000 |
| H63 | 1.5157000000  | -1.4810000000 | -5.3120000000 |
| H64 | 0.4807000000  | -2.5741000000 | -5.6923000000 |
| C65 | -2.7112000000 | -3.4823000000 | 4.4506000000  |
| H66 | -3.5761000000 | -1.6764000000 | 4.1342000000  |
| H67 | -4.3520000000 | -2.8409000000 | 3.4595000000  |
| C68 | -3.1877000000 | -5.2693000000 | 0.9546000000  |
| H69 | -4.6451000000 | -3.9610000000 | 1.4844000000  |
| H70 | -4.2726000000 | -3.8530000000 | -0.0245000000 |
| C71 | -0.9438000000 | -4.9999000000 | -3.4649000000 |
| H72 | -2.4666000000 | -3.6557000000 | -3.6435000000 |
| H73 | -1.5287000000 | -3.6508000000 | -4.8826000000 |
| H74 | -0.1043000000 | 0.1304000000  | -5.8272000000 |
| H75 | -1.0165000000 | -1.0050000000 | -6.3547000000 |
| H76 | 0.3310000000  | -0.6851000000 | -7.0662000000 |
| H77 | -3.2902000000 | -4.2007000000 | 4.7108000000  |
| H78 | -2.3835000000 | -3.0521000000 | 5.2383000000  |
| H79 | -1.9909000000 | -3.8199000000 | 3.9502000000  |
| H80 | -3.7883000000 | -5.9564000000 | 1.2022000000  |
| H81 | -2.4894000000 | -5.1941000000 | 1.5825000000  |
| H82 | -2.8127000000 | -5.4936000000 | 0.0981000000  |
| H83 | -1.6314000000 | -5.5741000000 | -3.1528000000 |
| H84 | -0.3214000000 | -4.8383000000 | -2.7725000000 |
| H85 | -0.5033000000 | -5.4156000000 | -4.1956000000 |

#### 8. BUYKUB10

|     |               |               |               |
|-----|---------------|---------------|---------------|
| Fe1 | 0.0000000000  | 1.1814000000  | 2.1385000000  |
| N2  | 1.6277000000  | 1.1962000000  | 1.0308000000  |
| N3  | 0.0000000000  | 3.1680000000  | 2.1385000000  |
| N4  | 0.0000000000  | -0.8207000000 | 2.1385000000  |
| C5  | 2.1987000000  | 0.1245000000  | 0.3960000000  |
| C6  | 3.3999000000  | 0.5146000000  | -0.2842000000 |
| C7  | 3.5713000000  | 1.8431000000  | -0.0614000000 |
| C8  | 2.4567000000  | 2.2759000000  | 0.7527000000  |
| C9  | 2.1922000000  | 3.5698000000  | 1.1092000000  |
| C10 | 1.0102000000  | 4.0111000000  | 1.7226000000  |
| C11 | 0.6404000000  | 5.3836000000  | 1.8996000000  |
| C12 | 0.4409000000  | -3.0938000000 | 1.5267000000  |
| C13 | 0.7474000000  | -1.6228000000 | 1.3212000000  |
| C14 | 1.7106000000  | -1.1789000000 | 0.4648000000  |
| C15 | 4.3104000000  | -0.4132000000 | -1.0420000000 |
| C16 | 5.3188000000  | -1.1352000000 | -0.1436000000 |
| C17 | 4.7022000000  | 2.7306000000  | -0.4935000000 |
| C18 | 5.7398000000  | 2.9440000000  | 0.6123000000  |
| C19 | 1.5163000000  | 6.5644000000  | 1.5756000000  |
| C20 | 2.5748000000  | 6.8211000000  | 2.6416000000  |
| C21 | 1.7462000000  | -3.8892000000 | 1.6049000000  |
| C22 | 1.6517000000  | -5.3446000000 | 1.9620000000  |
| H23 | 2.8663000000  | 4.2173000000  | 0.9238000000  |
| H24 | 2.0786000000  | -1.8164000000 | -0.1369000000 |
| H25 | -0.0656000000 | -3.4117000000 | 0.7870000000  |
| H26 | 4.7917000000  | 0.0948000000  | -1.6851000000 |
| H27 | 3.7852000000  | -1.0583000000 | -1.4884000000 |
| H28 | 4.3322000000  | 3.5697000000  | -0.7442000000 |
| H29 | 5.1199000000  | 2.3377000000  | -1.2489000000 |
| H30 | 0.9627000000  | 7.3447000000  | 1.5055000000  |
| H31 | 1.9473000000  | 6.4128000000  | 0.7442000000  |
| H32 | 2.2974000000  | -3.4749000000 | 2.2583000000  |
| H33 | 2.1661000000  | -3.8224000000 | 0.7528000000  |

|     |               |               |               |
|-----|---------------|---------------|---------------|
| H34 | 5.2950000000  | -2.0691000000 | -0.3165000000 |
| H35 | 6.1920000000  | -0.8213000000 | -0.3165000000 |
| H36 | 5.0980000000  | -0.9793000000 | 0.7699000000  |
| H37 | 6.4327000000  | 2.2903000000  | 0.5303000000  |
| H38 | 6.1264000000  | 3.8066000000  | 0.5303000000  |
| H39 | 5.3168000000  | 2.8589000000  | 1.4627000000  |
| H40 | 2.9100000000  | 7.7080000000  | 2.5405000000  |
| H41 | 2.1880000000  | 6.7287000000  | 3.4986000000  |
| H42 | 3.2820000000  | 6.1916000000  | 2.5405000000  |
| H43 | 0.8533000000  | -5.7020000000 | 1.5996000000  |
| H44 | 2.3849000000  | -5.8126000000 | 1.5996000000  |
| H45 | 1.6410000000  | -5.4493000000 | 2.8998000000  |
| N46 | -1.6277000000 | 1.1962000000  | 3.2462000000  |
| C47 | -1.0102000000 | 4.0111000000  | 2.5544000000  |
| C48 | -0.7474000000 | -1.6228000000 | 2.9558000000  |
| C49 | -0.6404000000 | 5.3836000000  | 2.3774000000  |
| C50 | -0.4409000000 | -3.0938000000 | 2.7503000000  |
| C51 | -2.1987000000 | 0.1245000000  | 3.8810000000  |
| C52 | -2.4567000000 | 2.2759000000  | 3.5243000000  |
| C53 | -2.1922000000 | 3.5698000000  | 3.1678000000  |
| C54 | -1.7106000000 | -1.1789000000 | 3.8122000000  |
| C55 | -1.5163000000 | 6.5644000000  | 2.7014000000  |
| C56 | -1.7462000000 | -3.8892000000 | 2.6721000000  |
| H57 | 0.0656000000  | -3.4117000000 | 3.4900000000  |
| C58 | -3.3999000000 | 0.5146000000  | 4.5612000000  |
| C59 | -3.5713000000 | 1.8431000000  | 4.3384000000  |
| H60 | -2.8663000000 | 4.2173000000  | 3.3532000000  |
| H61 | -2.0786000000 | -1.8164000000 | 4.4139000000  |
| C62 | -2.5748000000 | 6.8211000000  | 1.6354000000  |
| H63 | -0.9627000000 | 7.3447000000  | 2.7715000000  |
| H64 | -1.9473000000 | 6.4128000000  | 3.5328000000  |
| C65 | -1.6517000000 | -5.3446000000 | 2.3150000000  |
| H66 | -2.2974000000 | -3.4749000000 | 2.0187000000  |
| H67 | -2.1661000000 | -3.8224000000 | 3.5242000000  |
| C68 | -4.3104000000 | -0.4132000000 | 5.3190000000  |
| C69 | -4.7022000000 | 2.7306000000  | 4.7705000000  |
| H70 | -2.9100000000 | 7.7080000000  | 1.7365000000  |
| H71 | -2.1880000000 | 6.7287000000  | 0.7784000000  |
| H72 | -3.2820000000 | 6.1916000000  | 1.7365000000  |
| H73 | -0.8533000000 | -5.7020000000 | 2.6774000000  |
| H74 | -2.3849000000 | -5.8126000000 | 2.6774000000  |
| H75 | -1.6410000000 | -5.4493000000 | 1.3772000000  |
| C76 | -5.3188000000 | -1.1352000000 | 4.4206000000  |
| H77 | -4.7917000000 | 0.0948000000  | 5.9621000000  |
| H78 | -3.7852000000 | -1.0583000000 | 5.7654000000  |
| C79 | -5.7398000000 | 2.9440000000  | 3.6647000000  |
| H80 | -4.3322000000 | 3.5697000000  | 5.0212000000  |
| H81 | -5.1199000000 | 2.3377000000  | 5.5259000000  |
| H82 | -5.2950000000 | -2.0691000000 | 4.5935000000  |
| H83 | -6.1920000000 | -0.8213000000 | 4.5935000000  |
| H84 | -5.0980000000 | -0.9793000000 | 3.5071000000  |
| H85 | -6.4327000000 | 2.2903000000  | 3.7467000000  |
| H86 | -6.1264000000 | 3.8066000000  | 3.7467000000  |
| H87 | -5.3168000000 | 2.8589000000  | 2.8143000000  |

#### 9. FATBOR

|     |              |               |               |
|-----|--------------|---------------|---------------|
| Fe1 | 0.0000000000 | 0.0000000000  | 0.0000000000  |
| Fe2 | 2.8180000000 | -1.3702000000 | 0.5859000000  |
| S3  | 0.7449000000 | -2.3706000000 | 0.0810000000  |
| S4  | 1.5587000000 | 0.0172000000  | 1.9817000000  |
| S5  | 2.2415000000 | 0.1366000000  | -1.1045000000 |
| O6  | 4.2270000000 | -2.8422000000 | -1.5329000000 |
| O7  | 3.1191000000 | -3.5030000000 | 2.5755000000  |
| O8  | 5.1007000000 | 0.2056000000  | 1.5464000000  |
| C9  | 3.6955000000 | -2.2864000000 | -0.7037000000 |
| C10 | 3.0002000000 | -2.6723000000 | 1.8189000000  |

|      |               |               |               |
|------|---------------|---------------|---------------|
| C11  | 4.2357000000  | -0.4174000000 | 1.1475000000  |
| C12  | 0.8511000000  | -3.2586000000 | -1.4662000000 |
| C13  | 0.7487000000  | -2.6440000000 | -2.7009000000 |
| C14  | 0.8031000000  | -3.3950000000 | -3.8484000000 |
| C15  | 0.9741000000  | -4.7563000000 | -3.7820000000 |
| C16  | 1.0732000000  | -5.3688000000 | -2.5719000000 |
| C17  | 1.0139000000  | -4.6252000000 | -1.4187000000 |
| C18  | 1.1269000000  | -0.8495000000 | 3.4816000000  |
| C19  | -0.0735000000 | -1.4914000000 | 3.6417000000  |
| C20  | -0.3713000000 | -2.1154000000 | 4.8328000000  |
| C21  | 0.5292000000  | -2.1427000000 | 5.8514000000  |
| C22  | 1.7312000000  | -1.5008000000 | 5.6977000000  |
| C23  | 2.0279000000  | -0.8422000000 | 4.5180000000  |
| C24  | 3.0796000000  | 1.7200000000  | -1.0546000000 |
| C25  | 3.0372000000  | 2.5685000000  | 0.0247000000  |
| C26  | 3.6899000000  | 3.7883000000  | -0.0247000000 |
| C27  | 4.3539000000  | 4.1637000000  | -1.1532000000 |
| C28  | 4.3725000000  | 3.3488000000  | -2.2381000000 |
| C29  | 3.7449000000  | 2.1070000000  | -2.2078000000 |
| H30  | 0.6410000000  | -1.7012000000 | -2.7445000000 |
| H31  | 0.7281000000  | -2.9692000000 | -4.6944000000 |
| H32  | 1.0229000000  | -5.2713000000 | -4.5787000000 |
| H33  | 1.1764000000  | -6.3117000000 | -2.5264000000 |
| H34  | 1.0933000000  | -5.0542000000 | -0.5728000000 |
| H35  | -0.6920000000 | -1.5071000000 | 2.9209000000  |
| H36  | -1.2193000000 | -2.5297000000 | 4.9447000000  |
| H37  | 0.3365000000  | -2.6052000000 | 6.6575000000  |
| H38  | 2.3630000000  | -1.5124000000 | 6.4071000000  |
| H39  | 2.8507000000  | -0.3776000000 | 4.4269000000  |
| H40  | 2.5568000000  | 2.3126000000  | 0.8042000000  |
| H41  | 3.6719000000  | 4.3693000000  | 0.7264000000  |
| H42  | 4.8108000000  | 4.9954000000  | -1.1817000000 |
| H43  | 4.8196000000  | 3.6278000000  | -3.0291000000 |
| H44  | 3.7663000000  | 1.5271000000  | -2.9608000000 |
| S45  | -0.7449000000 | 2.3706000000  | -0.0810000000 |
| S46  | -1.5587000000 | -0.0172000000 | -1.9817000000 |
| S47  | -2.2415000000 | -0.1366000000 | 1.1045000000  |
| Fe48 | -2.8180000000 | 1.3702000000  | -0.5859000000 |
| C49  | -0.8511000000 | 3.2586000000  | 1.4662000000  |
| C50  | -1.1269000000 | 0.8495000000  | -3.4816000000 |
| C51  | -3.0796000000 | -1.7200000000 | 1.0546000000  |
| C52  | -3.6955000000 | 2.2864000000  | 0.7037000000  |
| C53  | -3.0002000000 | 2.6723000000  | -1.8189000000 |
| C54  | -4.2357000000 | 0.4174000000  | -1.1475000000 |
| C55  | -0.7487000000 | 2.6440000000  | 2.7009000000  |
| C56  | -1.0139000000 | 4.6252000000  | 1.4187000000  |
| C57  | 0.0735000000  | 1.4914000000  | -3.6417000000 |
| C58  | -2.0279000000 | 0.8422000000  | -4.5180000000 |
| C59  | -3.0372000000 | -2.5685000000 | -0.0247000000 |
| C60  | -3.7449000000 | -2.1070000000 | 2.2078000000  |
| O61  | -4.2270000000 | 2.8422000000  | 1.5329000000  |
| O62  | -3.1191000000 | 3.5030000000  | -2.5755000000 |
| O63  | -5.1007000000 | -0.2056000000 | -1.5464000000 |
| C64  | -0.8031000000 | 3.3950000000  | 3.8484000000  |
| H65  | -0.6410000000 | 1.7012000000  | 2.7445000000  |
| C66  | -1.0732000000 | 5.3688000000  | 2.5719000000  |
| H67  | -1.0933000000 | 5.0542000000  | 0.5728000000  |
| C68  | 0.3713000000  | 2.1154000000  | -4.8328000000 |
| H69  | 0.6920000000  | 1.5071000000  | -2.9209000000 |
| C70  | -1.7312000000 | 1.5008000000  | -5.6977000000 |
| H71  | -2.8507000000 | 0.3776000000  | -4.4269000000 |
| C72  | -3.6899000000 | -3.7883000000 | 0.0247000000  |
| H73  | -2.5568000000 | -2.3126000000 | -0.8042000000 |
| C74  | -4.3725000000 | -3.3488000000 | 2.2381000000  |
| H75  | -3.7663000000 | -1.5271000000 | 2.9608000000  |
| C76  | -0.9741000000 | 4.7563000000  | 3.7820000000  |

|     |               |               |               |
|-----|---------------|---------------|---------------|
| H77 | -0.7281000000 | 2.9692000000  | 4.6944000000  |
| H78 | -1.1764000000 | 6.3117000000  | 2.5264000000  |
| C79 | -0.5292000000 | 2.1427000000  | -5.8514000000 |
| H80 | 1.2193000000  | 2.5297000000  | -4.9447000000 |
| H81 | -2.3630000000 | 1.5124000000  | -6.4071000000 |
| C82 | -4.3539000000 | -4.1637000000 | 1.1532000000  |
| H83 | -3.6719000000 | -4.3693000000 | -0.7264000000 |
| H84 | -4.8196000000 | -3.6278000000 | 3.0291000000  |
| H85 | -1.0229000000 | 5.2713000000  | 4.5787000000  |
| H86 | -0.3365000000 | 2.6052000000  | -6.6575000000 |
| H87 | -4.8108000000 | -4.9954000000 | 1.1817000000  |

10. VUPJUL

|     |               |               |               |
|-----|---------------|---------------|---------------|
| Fe1 | 4.1920000000  | 3.8750000000  | 3.9570000000  |
| Fe2 | 2.3710000000  | 0.7980000000  | 4.4730000000  |
| O3  | 2.3510000000  | 2.9660000000  | 4.6440000000  |
| H4  | 2.1300000000  | 3.0300000000  | 5.4660000000  |
| H5  | 1.6840000000  | 3.4080000000  | 4.0780000000  |
| O6  | 5.3520000000  | 2.5540000000  | 5.0730000000  |
| O7  | 4.3070000000  | 0.5930000000  | 5.2010000000  |
| O8  | 4.2180000000  | 2.7350000000  | 2.2190000000  |
| O9  | 3.0460000000  | 0.8690000000  | 2.5090000000  |
| O10 | 2.9600000000  | 5.2810000000  | 2.8910000000  |
| O11 | 0.9270000000  | 4.4050000000  | 3.1050000000  |
| O12 | 1.6490000000  | 0.7630000000  | 6.4510000000  |
| O13 | 1.5980000000  | 2.8900000000  | 7.1020000000  |
| N14 | 6.0250000000  | 4.9730000000  | 3.2210000000  |
| N15 | 4.4000000000  | 5.4270000000  | 5.6300000000  |
| N16 | 2.2410000000  | -1.4570000000 | 4.3800000000  |
| N17 | 0.2240000000  | 0.5990000000  | 3.6870000000  |
| C18 | 6.2850000000  | 5.9960000000  | 4.2440000000  |
| C19 | 5.4350000000  | 6.2870000000  | 5.1610000000  |
| C20 | 7.1970000000  | 4.0660000000  | 3.1630000000  |
| C21 | 5.8230000000  | 5.5550000000  | 1.9070000000  |
| C22 | 4.7480000000  | 4.8470000000  | 6.9290000000  |
| C23 | 3.1780000000  | 6.2150000000  | 5.8210000000  |
| C24 | 1.0240000000  | -1.7370000000 | 3.5840000000  |
| C25 | -0.0940000000 | -0.8220000000 | 3.9310000000  |
| C26 | 3.4110000000  | -2.0280000000 | 3.6900000000  |
| C27 | 2.1730000000  | -2.0700000000 | 5.7130000000  |
| C28 | 0.1000000000  | 0.9470000000  | 2.2620000000  |
| C29 | -0.7560000000 | 1.4280000000  | 4.4050000000  |
| C30 | 6.3910000000  | 0.7800000000  | 6.2540000000  |
| C31 | 6.4290000000  | -0.5630000000 | 6.5210000000  |
| C32 | 7.4650000000  | -1.1130000000 | 7.2710000000  |
| C33 | 8.4380000000  | -0.3160000000 | 7.7750000000  |
| C34 | 8.4060000000  | 1.0260000000  | 7.5380000000  |
| C35 | 7.3850000000  | 1.5870000000  | 6.7600000000  |
| C36 | 5.2620000000  | 1.3560000000  | 5.4450000000  |
| C37 | 3.7840000000  | 1.3890000000  | 0.3450000000  |
| C38 | 3.6240000000  | 0.1230000000  | -0.1360000000 |
| C39 | 3.7860000000  | -0.1670000000 | -1.4740000000 |
| C40 | 4.0690000000  | 0.8330000000  | -2.3530000000 |
| C41 | 4.2130000000  | 2.0990000000  | -1.8990000000 |
| C42 | 4.0850000000  | 2.3990000000  | -0.5470000000 |
| C43 | 3.6780000000  | 1.6940000000  | 1.8060000000  |
| C44 | 1.1210000000  | 6.3740000000  | 1.8340000000  |
| C45 | 1.9280000000  | 7.2600000000  | 1.1580000000  |
| C46 | 1.3280000000  | 8.2910000000  | 0.4050000000  |
| C47 | -0.0360000000 | 8.4110000000  | 0.3680000000  |
| C48 | -0.8240000000 | 7.5420000000  | 1.0270000000  |
| C49 | -0.2660000000 | 6.5140000000  | 1.7700000000  |
| C50 | 1.7090000000  | 5.2650000000  | 2.6630000000  |
| C51 | 1.0280000000  | 1.2320000000  | 8.6650000000  |
| C52 | 0.4350000000  | 2.1340000000  | 9.5340000000  |
| C53 | -0.0330000000 | 1.7070000000  | 10.7580000000 |

|      |               |               |               |
|------|---------------|---------------|---------------|
| C54  | 0.1150000000  | 0.4040000000  | 11.1350000000 |
| C55  | 0.7150000000  | -0.5160000000 | 10.3040000000 |
| C56  | 1.1670000000  | -0.0830000000 | 9.0630000000  |
| C57  | 1.4670000000  | 1.6710000000  | 7.3070000000  |
| H58  | 6.4690000000  | 6.9160000000  | 3.7080000000  |
| H59  | 7.1880000000  | 5.6840000000  | 4.7560000000  |
| H60  | 6.0280000000  | 6.5190000000  | 6.0330000000  |
| H61  | 4.9300000000  | 7.1800000000  | 4.8130000000  |
| H62  | 7.3650000000  | 3.6210000000  | 4.1350000000  |
| H63  | 8.0710000000  | 4.6250000000  | 2.8720000000  |
| H64  | 7.0130000000  | 3.2880000000  | 2.4400000000  |
| H65  | 4.9710000000  | 6.2200000000  | 1.9270000000  |
| H66  | 5.6470000000  | 4.7690000000  | 1.1910000000  |
| H67  | 6.7030000000  | 6.1080000000  | 1.6240000000  |
| H68  | 5.6470000000  | 4.2520000000  | 6.8380000000  |
| H69  | 3.9400000000  | 4.2200000000  | 7.2670000000  |
| H70  | 4.9120000000  | 5.6370000000  | 7.6420000000  |
| H71  | 2.8820000000  | 6.6660000000  | 4.8830000000  |
| H72  | 3.3610000000  | 6.9900000000  | 6.5480000000  |
| H73  | 2.3880000000  | 5.5720000000  | 6.1740000000  |
| H74  | 1.2530000000  | -1.6160000000 | 2.5370000000  |
| H75  | 0.7180000000  | -2.7530000000 | 3.7730000000  |
| H76  | -0.3260000000 | -0.9530000000 | 4.9770000000  |
| H77  | -0.9550000000 | -1.0840000000 | 3.3340000000  |
| H78  | 3.4850000000  | -1.5930000000 | 2.7030000000  |
| H79  | 3.2960000000  | -3.0970000000 | 3.6050000000  |
| H80  | 4.3070000000  | -1.8100000000 | 4.2520000000  |
| H81  | 1.3240000000  | -1.6700000000 | 6.2440000000  |
| H82  | 3.0790000000  | -1.8530000000 | 6.2620000000  |
| H83  | 2.0680000000  | -3.1390000000 | 5.6160000000  |
| H84  | 0.8050000000  | 0.3600000000  | 1.6930000000  |
| H85  | 0.3100000000  | 1.9970000000  | 2.1240000000  |
| H86  | -0.9030000000 | 0.7380000000  | 1.9220000000  |
| H87  | -0.7010000000 | 1.2060000000  | 5.4610000000  |
| H88  | -1.7500000000 | 1.2140000000  | 4.0400000000  |
| H89  | -0.5370000000 | 2.4730000000  | 4.2420000000  |
| H90  | 5.6460000000  | -1.2010000000 | 6.1450000000  |
| H91  | 7.4980000000  | -2.1780000000 | 7.4550000000  |
| H92  | 9.2400000000  | -0.7460000000 | 8.3650000000  |
| H93  | 9.1740000000  | 1.6590000000  | 7.9540000000  |
| H94  | 7.3730000000  | 2.6470000000  | 6.5560000000  |
| H95  | 3.3650000000  | -0.6700000000 | 0.5490000000  |
| H96  | 3.6890000000  | -1.1830000000 | -1.8210000000 |
| H97  | 4.1740000000  | 0.6200000000  | -3.4050000000 |
| H98  | 4.4340000000  | 2.8910000000  | -2.5990000000 |
| H99  | 4.2180000000  | 3.4100000000  | -0.1990000000 |
| H100 | 3.0040000000  | 7.1640000000  | 1.2070000000  |
| H101 | 1.9410000000  | 8.9860000000  | -0.1440000000 |
| H102 | -0.4920000000 | 9.2160000000  | -0.1960000000 |
| H103 | -1.8980000000 | 7.6500000000  | 0.9740000000  |
| H104 | -0.9000000000 | 5.8220000000  | 2.2970000000  |
| H105 | 0.3420000000  | 3.1730000000  | 9.2530000000  |
| H106 | -0.5200000000 | 2.4070000000  | 11.4180000000 |
| H107 | -0.2420000000 | 0.0860000000  | 12.1020000000 |
| H108 | 0.8310000000  | -1.5470000000 | 10.6090000000 |
| H109 | 1.6370000000  | -0.7910000000 | 8.4000000000  |

11. VUPJOF

|     |               |              |              |
|-----|---------------|--------------|--------------|
| Fe1 | 1.7330000000  | 3.0670000000 | 4.8340000000 |
| Fe2 | -0.8120000000 | 4.8910000000 | 2.9520000000 |
| N3  | 3.7770000000  | 2.0990000000 | 4.9620000000 |
| N4  | 2.4700000000  | 4.0330000000 | 6.7500000000 |
| N5  | -1.4870000000 | 5.8050000000 | 1.0020000000 |
| N6  | -3.0390000000 | 4.1400000000 | 2.9020000000 |
| O7  | -0.2750000000 | 3.9360000000 | 4.8280000000 |
| H8  | -0.4790000000 | 4.5970000000 | 5.3210000000 |

|     |               |               |               |
|-----|---------------|---------------|---------------|
| H9  | -0.9310000000 | 2.8010000000  | 5.2340000000  |
| O10 | 2.5760000000  | 4.5650000000  | 3.7040000000  |
| O11 | 1.0700000000  | 5.8090000000  | 2.6340000000  |
| O12 | 1.2120000000  | 1.9410000000  | 3.0990000000  |
| O13 | -0.2800000000 | 3.1740000000  | 1.9660000000  |
| O14 | 0.9270000000  | 1.5300000000  | 6.0010000000  |
| O15 | -1.2350000000 | 1.6310000000  | 5.4490000000  |
| O16 | -0.8790000000 | 6.0720000000  | 6.1510000000  |
| O17 | -1.4620000000 | 6.5180000000  | 4.0570000000  |
| C18 | 0.3410000000  | 2.1090000000  | 2.2310000000  |
| C19 | -0.0310000000 | 0.9220000000  | 1.4230000000  |
| C20 | 2.2360000000  | 5.4520000000  | 2.9050000000  |
| C21 | 3.3750000000  | 6.1970000000  | 2.2060000000  |
| C22 | -0.2220000000 | 1.0390000000  | 5.8950000000  |
| C23 | -0.3850000000 | -0.4030000000 | 6.3320000000  |
| C24 | -1.3170000000 | 6.8430000000  | 5.2740000000  |
| C25 | -1.7200000000 | 8.2190000000  | 5.6830000000  |
| C26 | 3.6530000000  | 3.2330000000  | 7.1470000000  |
| C27 | 4.5060000000  | 2.8910000000  | 5.9580000000  |
| C28 | 3.6980000000  | 0.6860000000  | 5.4080000000  |
| C29 | 4.4520000000  | 2.1200000000  | 3.6640000000  |
| C30 | 1.4700000000  | 3.9760000000  | 7.8300000000  |
| C31 | 2.8340000000  | 5.4460000000  | 6.5790000000  |
| C32 | -3.6570000000 | 5.0430000000  | 1.9070000000  |
| C33 | -2.8060000000 | 5.2150000000  | 0.6900000000  |
| C34 | -3.7050000000 | 4.3000000000  | 4.2070000000  |
| C35 | -0.5060000000 | 5.4700000000  | -0.0750000000 |
| C36 | -1.5630000000 | 7.2590000000  | 1.1360000000  |
| C37 | -3.1980000000 | 2.7470000000  | 2.4970000000  |
| H38 | 3.0100000000  | 6.8620000000  | 1.6200000000  |
| H39 | 3.9000000000  | 5.5740000000  | 1.6980000000  |
| H40 | 3.9310000000  | 6.6220000000  | 2.8620000000  |
| H41 | -0.7030000000 | 1.1670000000  | 0.7830000000  |
| H42 | -0.3770000000 | 0.2370000000  | 2.0040000000  |
| H43 | 0.7430000000  | 0.5900000000  | 0.9640000000  |
| H44 | -1.2960000000 | -0.6750000000 | 6.2070000000  |
| H45 | -0.1530000000 | -0.4820000000 | 7.2620000000  |
| H46 | 0.1920000000  | -0.9640000000 | 5.8080000000  |
| H47 | -2.0250000000 | 8.7050000000  | 4.9150000000  |
| H48 | -0.9660000000 | 8.6720000000  | 6.0670000000  |
| H49 | -2.4260000000 | 8.1660000000  | 6.3290000000  |
| H50 | 4.1770000000  | 3.7370000000  | 7.7710000000  |
| H51 | 3.3550000000  | 2.4190000000  | 7.5620000000  |
| H52 | 5.2670000000  | 2.3870000000  | 6.2570000000  |
| H53 | 4.8040000000  | 3.7050000000  | 5.5460000000  |
| H54 | 3.2620000000  | 0.6450000000  | 6.2630000000  |
| H55 | 4.5850000000  | 0.3260000000  | 5.4860000000  |
| H56 | 3.1990000000  | 0.1750000000  | 4.7690000000  |
| H57 | 4.5230000000  | 3.0240000000  | 3.3520000000  |
| H58 | 3.9440000000  | 1.6050000000  | 3.0300000000  |
| H59 | 5.3300000000  | 1.7420000000  | 3.7510000000  |
| H60 | 1.2110000000  | 3.0650000000  | 7.9800000000  |
| H61 | 0.6990000000  | 4.4910000000  | 7.5800000000  |
| H62 | 1.8490000000  | 4.3360000000  | 8.6350000000  |
| H63 | 3.4930000000  | 5.5250000000  | 5.8860000000  |
| H64 | 3.1930000000  | 5.7860000000  | 7.3990000000  |
| H65 | 2.0540000000  | 5.9500000000  | 6.3350000000  |
| H66 | -4.5040000000 | 4.6760000000  | 1.6420000000  |
| H67 | -3.7930000000 | 5.9030000000  | 2.3130000000  |
| H68 | -3.2630000000 | 5.7900000000  | 0.0750000000  |
| H69 | -2.6710000000 | 4.3550000000  | 0.2840000000  |
| H70 | -3.6190000000 | 5.2090000000  | 4.5000000000  |
| H71 | -3.2950000000 | 3.7150000000  | 4.8500000000  |
| H72 | -4.6340000000 | 4.0770000000  | 4.1230000000  |
| H73 | -0.4490000000 | 4.5160000000  | -0.1690000000 |
| H74 | 0.3560000000  | 5.8220000000  | 0.1560000000  |



|     |               |              |               |
|-----|---------------|--------------|---------------|
| H75 | -0.8000000000 | 5.8570000000 | -0.9050000000 |
| H76 | -2.1860000000 | 7.4850000000 | 1.8320000000  |
| H77 | -1.8570000000 | 7.6430000000 | 0.3060000000  |
| H78 | -0.6960000000 | 7.6070000000 | 1.3610000000  |
| H79 | -2.7870000000 | 2.6150000000 | 1.6380000000  |
| H80 | -4.1330000000 | 2.5360000000 | 2.4370000000  |
| H81 | -2.7800000000 | 2.1750000000 | 3.1430000000  |

12. PTSQFE10

|     |              |               |               |
|-----|--------------|---------------|---------------|
| Fe1 | 4.2790000000 | 1.6230000000  | 0.9160000000  |
| S2  | 5.1260000000 | 0.2170000000  | -0.8060000000 |
| S3  | 3.9930000000 | -0.1270000000 | 2.5250000000  |
| S4  | 5.4270000000 | 3.5210000000  | 1.8230000000  |
| S5  | 2.2710000000 | 2.7920000000  | 0.3720000000  |
| O6  | 1.0340000000 | 5.8730000000  | 1.7610000000  |
| O7  | 3.9540000000 | 6.5300000000  | 3.2050000000  |
| O8  | 5.2370000000 | -3.4260000000 | -0.9770000000 |
| O9  | 4.2860000000 | -3.6930000000 | 2.1560000000  |
| C10 | 4.0070000000 | 4.4170000000  | 1.8550000000  |
| C11 | 2.7590000000 | 4.1370000000  | 1.2760000000  |
| C12 | 2.1290000000 | 5.3630000000  | 1.8060000000  |
| C13 | 3.4980000000 | 5.6900000000  | 2.4770000000  |
| C14 | 4.9190000000 | -1.1840000000 | 0.1370000000  |
| C15 | 4.4790000000 | -1.3210000000 | 1.4470000000  |
| C16 | 4.5460000000 | -2.8020000000 | 1.3920000000  |
| C17 | 4.9880000000 | -2.6590000000 | -0.0770000000 |

13. PTHPFE10

|     |               |               |               |
|-----|---------------|---------------|---------------|
| Fe1 | 2.9670000000  | 7.2270000000  | 0.0000000000  |
| S2  | 3.8920000000  | 5.6960000000  | -1.5390000000 |
| S3  | 3.2740000000  | 5.9430000000  | 1.9560000000  |
| S4  | 3.9290000000  | 9.3460000000  | 0.2070000000  |
| S5  | 0.7340000000  | 7.7800000000  | -0.5010000000 |
| C6  | 4.5160000000  | 6.4380000000  | -3.0000000000 |
| C7  | 4.5830000000  | 5.6990000000  | -4.1830000000 |
| C8  | 5.1970000000  | 6.2430000000  | -5.3160000000 |
| C9  | 5.6820000000  | 7.5100000000  | -5.3190000000 |
| C10 | 5.5800000000  | 8.2690000000  | -4.1700000000 |
| C11 | 4.9860000000  | 7.7290000000  | -3.0440000000 |
| C12 | 2.4560000000  | 6.7100000000  | 3.3060000000  |
| C13 | 1.7650000000  | 7.8900000000  | 3.1810000000  |
| C14 | 1.1080000000  | 8.4870000000  | 4.2530000000  |
| C15 | 1.1520000000  | 7.8970000000  | 5.4810000000  |
| C16 | 1.8380000000  | 6.7120000000  | 5.6550000000  |
| C17 | 2.4710000000  | 6.1260000000  | 4.5910000000  |
| C18 | 5.7240000000  | 9.2150000000  | 0.2640000000  |
| C19 | 6.3760000000  | 8.0080000000  | 0.1690000000  |
| C20 | 7.7680000000  | 7.9570000000  | 0.1540000000  |
| C21 | 8.4850000000  | 9.2270000000  | 0.2620000000  |
| C22 | 7.7820000000  | 10.3320000000 | 0.3860000000  |
| C23 | 6.4850000000  | 10.3040000000 | 0.3790000000  |
| C24 | -0.2370000000 | 6.3100000000  | -0.5160000000 |
| C25 | -1.6560000000 | 6.3980000000  | -0.4160000000 |
| C26 | -2.4270000000 | 5.2490000000  | -0.4960000000 |
| C27 | -1.8430000000 | 4.0190000000  | -0.6830000000 |
| C28 | -0.4980000000 | 3.9240000000  | -0.7600000000 |
| C29 | 0.2900000000  | 5.0350000000  | -0.6850000000 |
| H30 | 4.2470000000  | 4.8050000000  | -4.2150000000 |
| H31 | 5.2590000000  | 5.7820000000  | -6.1290000000 |
| H32 | 6.0780000000  | 7.8680000000  | -6.1160000000 |
| H33 | 5.9240000000  | 9.1600000000  | -4.2000000000 |
| H34 | 4.9120000000  | 8.2460000000  | -2.2720000000 |
| H35 | 1.7470000000  | 8.2900000000  | 2.3020000000  |
| H36 | 0.6320000000  | 9.3080000000  | 4.1110000000  |
| H37 | 0.7000000000  | 8.3150000000  | 6.1810000000  |
| H38 | 1.8520000000  | 6.3120000000  | 6.5020000000  |

|     |               |               |               |
|-----|---------------|---------------|---------------|
| H39 | 2.9300000000  | 5.3120000000  | 4.7010000000  |
| H40 | 5.8650000000  | 7.2030000000  | 0.0570000000  |
| H41 | 8.2190000000  | 7.1200000000  | 0.0320000000  |
| H42 | 9.4100000000  | 9.1940000000  | 0.1990000000  |
| H43 | 8.3150000000  | 11.1710000000 | 0.4610000000  |
| H44 | 6.0680000000  | 11.1320000000 | 0.4460000000  |
| H45 | -2.0470000000 | 7.2640000000  | -0.3290000000 |
| H46 | -3.3780000000 | 5.3640000000  | -0.4460000000 |
| H47 | -2.4090000000 | 3.2590000000  | -0.7720000000 |
| H48 | -0.1320000000 | 3.0590000000  | -0.9090000000 |
| H49 | 1.2360000000  | 4.9420000000  | -0.7600000000 |

#### 14. CACZIP10

|     |               |               |              |
|-----|---------------|---------------|--------------|
| Fe1 | -2.5940000000 | 0.6370000000  | 5.1640000000 |
| Fe2 | -0.1270000000 | 2.5890000000  | 5.1740000000 |
| O3  | -0.8410000000 | 0.9500000000  | 5.1640000000 |
| O4  | -3.0620000000 | 1.9360000000  | 6.6660000000 |
| O5  | -3.0910000000 | 2.0070000000  | 3.7360000000 |
| O6  | -1.3340000000 | 3.3550000000  | 6.6440000000 |
| O7  | -1.3420000000 | 3.3980000000  | 3.7490000000 |
| N8  | -2.5420000000 | -0.9980000000 | 6.5640000000 |
| N9  | -4.7420000000 | 0.1640000000  | 5.1380000000 |
| N10 | -2.5190000000 | -0.9430000000 | 3.6950000000 |
| N11 | -3.2670000000 | -2.1450000000 | 6.3440000000 |
| N12 | -5.1750000000 | -1.1320000000 | 5.1000000000 |
| N13 | -3.2370000000 | -2.0950000000 | 3.8590000000 |
| N14 | 1.4070000000  | 2.1550000000  | 6.6150000000 |
| N15 | 0.8350000000  | 4.5410000000  | 5.1740000000 |
| N16 | 1.3960000000  | 2.1830000000  | 3.7150000000 |
| N17 | 2.6960000000  | 2.5440000000  | 6.4080000000 |
| N18 | 2.1900000000  | 4.6550000000  | 5.1920000000 |
| N19 | 2.6870000000  | 2.5720000000  | 3.9190000000 |
| C20 | -1.8730000000 | -1.1900000000 | 7.6950000000 |
| C21 | -2.1540000000 | -2.4290000000 | 8.2310000000 |
| C22 | -3.0340000000 | -2.9980000000 | 7.3540000000 |
| C23 | -5.8380000000 | 0.9170000000  | 5.1140000000 |
| C24 | -6.9670000000 | 0.1290000000  | 5.0560000000 |
| C25 | -6.4980000000 | -1.1530000000 | 5.0490000000 |
| C26 | -1.8310000000 | -1.0770000000 | 2.5760000000 |
| C27 | -2.0830000000 | -2.3040000000 | 1.9930000000 |
| C28 | -2.9780000000 | -2.9160000000 | 2.8280000000 |
| C29 | 1.3870000000  | 1.4940000000  | 7.7660000000 |
| C30 | 2.6530000000  | 1.4470000000  | 8.3070000000 |
| C31 | 3.4410000000  | 2.1190000000  | 7.4340000000 |
| C32 | 0.3610000000  | 5.7800000000  | 5.1780000000 |
| C33 | 1.3790000000  | 6.6930000000  | 5.1940000000 |
| C34 | 2.5190000000  | 5.9640000000  | 5.2000000000 |
| C35 | 1.3680000000  | 1.5550000000  | 2.5350000000 |
| C36 | 2.6430000000  | 1.5290000000  | 1.9700000000 |
| C37 | 3.4300000000  | 2.1780000000  | 2.8660000000 |
| C38 | -2.4140000000 | 2.9190000000  | 7.1100000000 |
| C39 | -3.0010000000 | 3.6560000000  | 8.2800000000 |
| C40 | -2.4610000000 | 3.0150000000  | 3.3210000000 |
| C41 | -3.1010000000 | 3.8400000000  | 2.2450000000 |
| B42 | -4.1380000000 | -2.2700000000 | 5.0870000000 |
| B43 | 3.0560000000  | 3.3800000000  | 5.1740000000 |
| H44 | -4.6680000000 | -3.2350000000 | 5.0990000000 |
| H45 | 3.9890000000  | 3.5980000000  | 5.2230000000 |
| H46 | -1.2830000000 | -0.5580000000 | 8.0830000000 |
| H47 | -1.8110000000 | -2.8040000000 | 9.0320000000 |
| H48 | -3.4220000000 | -3.8600000000 | 7.4430000000 |
| H49 | -5.8390000000 | 1.8670000000  | 5.1340000000 |
| H50 | -7.8710000000 | 0.4160000000  | 5.0250000000 |
| H51 | -7.0340000000 | -1.9360000000 | 5.0120000000 |
| H52 | -1.2460000000 | -0.4210000000 | 2.2210000000 |
| H53 | -1.7160000000 | -2.6480000000 | 1.1870000000 |

|     |               |               |              |
|-----|---------------|---------------|--------------|
| H54 | -3.3520000000 | -3.7800000000 | 2.7040000000 |
| H55 | 0.6100000000  | 1.1100000000  | 8.1550000000 |
| H56 | 2.9130000000  | 1.0310000000  | 9.1210000000 |
| H57 | 4.3730000000  | 2.2670000000  | 7.5360000000 |
| H58 | -0.5630000000 | 6.0020000000  | 5.1680000000 |
| H59 | 1.3010000000  | 7.6390000000  | 5.2030000000 |
| H60 | 3.4030000000  | 6.3120000000  | 5.2070000000 |
| H61 | 0.5900000000  | 1.1790000000  | 2.1400000000 |
| H62 | 2.9030000000  | 1.1450000000  | 1.1420000000 |
| H63 | 4.3620000000  | 2.3310000000  | 2.7680000000 |
| H64 | -3.8640000000 | 3.3480000000  | 8.5260000000 |
| H65 | -3.0390000000 | 4.5860000000  | 8.0890000000 |
| H66 | -2.3940000000 | 3.5050000000  | 8.9950000000 |
| H67 | -3.7550000000 | 3.3200000000  | 1.7900000000 |
| H68 | -2.4750000000 | 4.1790000000  | 1.6140000000 |
| H69 | -3.5230000000 | 4.5610000000  | 2.6920000000 |

15. COCJIN10

|     |               |               |               |
|-----|---------------|---------------|---------------|
| Fe1 | 1.2623000000  | 2.3808000000  | 13.0232000000 |
| Fe2 | 3.8887000000  | 0.2507000000  | 12.4037000000 |
| O3  | 2.3455000000  | 1.2891000000  | 11.8085000000 |
| O4  | 1.2314000000  | 0.9193000000  | 14.3822000000 |
| O5  | 2.8740000000  | 3.1958000000  | 13.8824000000 |
| O6  | 2.8674000000  | -0.5422000000 | 13.9338000000 |
| O7  | 4.5402000000  | 1.7315000000  | 13.5772000000 |
| N8  | -0.5344000000 | 1.6657000000  | 12.1915000000 |
| N9  | 0.0034000000  | 3.5985000000  | 14.2016000000 |
| N10 | -1.5137000000 | 2.5524000000  | 11.8256000000 |
| N11 | 1.1647000000  | 3.9272000000  | 11.6216000000 |
| N12 | -1.0628000000 | 4.2201000000  | 13.5990000000 |
| N13 | -0.0246000000 | 4.5190000000  | 11.3413000000 |
| N14 | 3.3883000000  | -1.3469000000 | 11.1467000000 |
| N15 | 5.5970000000  | -0.8767000000 | 12.8828000000 |
| N16 | 5.0939000000  | 0.9564000000  | 10.8244000000 |
| N17 | 4.3626000000  | -1.9507000000 | 10.3947000000 |
| N18 | 6.2999000000  | -1.5004000000 | 11.8941000000 |
| N19 | 5.7857000000  | 0.0737000000  | 10.0475000000 |
| B20 | -1.3094000000 | 4.0767000000  | 12.0965000000 |
| B21 | 5.7966000000  | -1.4266000000 | 10.4383000000 |
| C22 | -0.9960000000 | 0.4443000000  | 11.8801000000 |
| C23 | -2.2604000000 | 0.5519000000  | 11.3320000000 |
| C24 | -2.5603000000 | 1.8909000000  | 11.3009000000 |
| C25 | -0.0813000000 | 3.8874000000  | 15.4955000000 |
| C26 | -1.1802000000 | 4.6644000000  | 15.7493000000 |
| C27 | -1.7769000000 | 4.8478000000  | 14.5395000000 |
| C28 | 2.0706000000  | 4.5389000000  | 10.8742000000 |
| C29 | 1.4862000000  | 5.5332000000  | 10.1144000000 |
| C30 | 0.1682000000  | 5.4814000000  | 10.4476000000 |
| C31 | 2.2604000000  | -2.0264000000 | 10.9256000000 |
| C32 | 2.4939000000  | -3.0665000000 | 10.0428000000 |
| C33 | 3.8170000000  | -2.9907000000 | 9.7314000000  |
| C34 | 6.3070000000  | -1.0799000000 | 14.0163000000 |
| C35 | 7.4305000000  | -1.8211000000 | 13.7625000000 |
| C36 | 7.3925000000  | -2.0722000000 | 12.4141000000 |
| C37 | 5.3838000000  | 2.1698000000  | 10.3744000000 |
| C38 | 6.2580000000  | 2.0822000000  | 9.2939000000  |
| C39 | 6.4857000000  | 0.7472000000  | 9.1397000000  |
| C40 | 1.8474000000  | -0.1574000000 | 14.5831000000 |
| C41 | 1.3500000000  | -1.0640000000 | 15.6808000000 |
| C42 | 4.0722000000  | 2.8174000000  | 14.0101000000 |
| C43 | 5.0196000000  | 3.7260000000  | 14.7450000000 |
| H44 | 2.0256000000  | 1.3688000000  | 11.1156000000 |
| H45 | -2.1317000000 | 4.6644000000  | 11.6808000000 |
| H46 | 6.4508000000  | -2.0064000000 | 9.7937000000  |
| H47 | 0.6243000000  | -0.6755000000 | 16.1541000000 |
| H48 | 2.0622000000  | -1.2433000000 | 16.2849000000 |

|     |               |               |               |
|-----|---------------|---------------|---------------|
| H49 | 1.0655000000  | -1.8789000000 | 15.2822000000 |
| H50 | 4.4775000000  | 4.1843000000  | 15.3787000000 |
| H51 | 5.3858000000  | 4.3516000000  | 14.1315000000 |
| H52 | 5.7219000000  | 3.2757000000  | 15.1997000000 |
| H53 | -0.5257000000 | -0.3666000000 | 12.0109000000 |
| H54 | -2.8156000000 | -0.1554000000 | 11.0408000000 |
| H55 | -3.3600000000 | 2.2794000000  | 10.9739000000 |
| H56 | 0.5408000000  | 3.6004000000  | 16.1541000000 |
| H57 | -1.4725000000 | 4.9872000000  | 16.5994000000 |
| H58 | -2.5685000000 | 5.3558000000  | 14.3838000000 |
| H59 | 2.9964000000  | 4.3197000000  | 10.8602000000 |
| H60 | 1.9069000000  | 6.1170000000  | 9.4901000000  |
| H61 | -0.5098000000 | 6.0532000000  | 10.1035000000 |
| H62 | 1.4222000000  | -1.8291000000 | 11.3211000000 |
| H63 | 1.8624000000  | -3.7001000000 | 9.7174000000  |
| H64 | 4.2788000000  | -3.5726000000 | 9.1428000000  |
| H65 | 6.0580000000  | -0.7432000000 | 14.8711000000 |
| H66 | 8.0867000000  | -2.1021000000 | 14.3884000000 |
| H67 | 8.0387000000  | -2.5683000000 | 11.9283000000 |
| H68 | 5.0501000000  | 2.9828000000  | 10.7326000000 |
| H69 | 6.6160000000  | 2.7975000000  | 8.7816000000  |
| H70 | 7.0487000000  | 0.3606000000  | 8.4811000000  |

16. PIMTAG

|     |               |              |               |
|-----|---------------|--------------|---------------|
| Fe1 | 5.9819000000  | 3.3633000000 | 10.2127000000 |
| Fe2 | 8.9063000000  | 5.2382000000 | 11.1028000000 |
| P3  | 8.1935000000  | 2.3292000000 | 12.3132000000 |
| P4  | 6.0463000000  | 5.7032000000 | 12.4590000000 |
| O5  | 7.5334000000  | 4.5119000000 | 9.8776000000  |
| O6  | 7.0834000000  | 2.1421000000 | 11.3541000000 |
| O7  | 5.4703000000  | 4.5324000000 | 11.7408000000 |
| O8  | 9.0844000000  | 3.4799000000 | 12.0545000000 |
| O9  | 7.5404000000  | 5.8805000000 | 12.4109000000 |
| O10 | 7.5355000000  | 2.4170000000 | 13.7529000000 |
| O11 | 9.0194000000  | 1.0013000000 | 12.4348000000 |
| O12 | 5.3148000000  | 6.9741000000 | 11.8450000000 |
| O13 | 5.6767000000  | 5.6507000000 | 13.9908000000 |
| N14 | 6.2789000000  | 2.1031000000 | 8.5696000000  |
| N15 | 4.3255000000  | 2.0928000000 | 10.6356000000 |
| N16 | 4.6681000000  | 4.3847000000 | 8.9222000000  |
| N17 | 5.1951000000  | 1.6332000000 | 7.8484000000  |
| N18 | 3.4889000000  | 1.7317000000 | 9.6408000000  |
| N19 | 3.8154000000  | 3.7014000000 | 8.1406000000  |
| N20 | 10.4515000000 | 4.6863000000 | 9.7566000000  |
| N21 | 10.4563000000 | 6.0672000000 | 12.2753000000 |
| N22 | 8.9229000000  | 7.0931000000 | 10.1356000000 |
| N23 | 11.4369000000 | 5.5747000000 | 9.4592000000  |
| N24 | 11.4730000000 | 6.7443000000 | 11.6384000000 |
| N25 | 10.1212000000 | 7.6409000000 | 9.7329000000  |
| C26 | 7.3293000000  | 1.4917000000 | 8.0748000000  |
| C27 | 6.9578000000  | 0.6012000000 | 7.0562000000  |
| C28 | 5.6159000000  | 0.7366000000 | 6.9588000000  |
| C29 | 3.8535000000  | 1.5614000000 | 11.7595000000 |
| C30 | 2.7054000000  | 0.8679000000 | 11.5489000000 |
| C31 | 2.4709000000  | 0.9869000000 | 10.1750000000 |
| C32 | 4.4622000000  | 5.6753000000 | 8.6669000000  |
| C33 | 3.4610000000  | 5.8271000000 | 7.7458000000  |
| C34 | 3.0655000000  | 4.5242000000 | 7.3957000000  |
| C35 | 10.6660000000 | 3.6132000000 | 9.0380000000  |
| C36 | 11.7825000000 | 3.7774000000 | 8.2748000000  |
| C37 | 12.2368000000 | 5.0290000000 | 8.5432000000  |
| C38 | 10.7579000000 | 6.0405000000 | 13.5518000000 |
| C39 | 11.9544000000 | 6.6889000000 | 13.7966000000 |
| C40 | 12.3826000000 | 7.0951000000 | 12.5622000000 |
| C41 | 7.9671000000  | 7.8707000000 | 9.6013000000  |
| C42 | 8.5016000000  | 8.8966000000 | 8.8722000000  |

|      |               |               |               |
|------|---------------|---------------|---------------|
| C43  | 9.8656000000  | 8.7366000000  | 8.9828000000  |
| C44  | 8.3126000000  | 2.5812000000  | 14.9230000000 |
| C45  | 8.3236000000  | 3.8553000000  | 15.5205000000 |
| C46  | 9.0154000000  | 4.0605000000  | 16.6601000000 |
| C47  | 9.6143000000  | 2.9690000000  | 17.2918000000 |
| C48  | 9.5988000000  | 1.7481000000  | 16.7285000000 |
| C49  | 8.9321000000  | 1.5450000000  | 15.5152000000 |
| C50  | 9.6873000000  | 0.4370000000  | 11.3226000000 |
| C51  | 9.0479000000  | -0.4186000000 | 10.5093000000 |
| C52  | 9.6567000000  | -1.0403000000 | 9.4881000000  |
| C53  | 10.9675000000 | -0.7920000000 | 9.2749000000  |
| C54  | 11.6652000000 | 0.0328000000  | 10.0171000000 |
| C55  | 11.0399000000 | 0.6976000000  | 11.1199000000 |
| C56  | 5.2414000000  | 8.2647000000  | 12.3832000000 |
| C57  | 4.4380000000  | 9.1100000000  | 11.7489000000 |
| C58  | 4.2572000000  | 10.4129000000 | 12.2516000000 |
| C59  | 4.9287000000  | 10.8171000000 | 13.3465000000 |
| C60  | 5.7994000000  | 9.9471000000  | 13.9992000000 |
| C61  | 5.9319000000  | 8.6299000000  | 13.4781000000 |
| C62  | 4.3986000000  | 5.2157000000  | 14.3914000000 |
| C63  | 4.1603000000  | 3.8800000000  | 14.5546000000 |
| C64  | 2.9001000000  | 3.4470000000  | 14.9178000000 |
| C65  | 1.9065000000  | 4.3601000000  | 15.1231000000 |
| C66  | 2.1248000000  | 5.7102000000  | 14.9467000000 |
| C67  | 3.4253000000  | 6.1780000000  | 14.5914000000 |
| B68  | 3.7737000000  | 2.1380000000  | 8.1800000000  |
| B69  | 11.4452000000 | 6.9453000000  | 10.1171000000 |
| H70  | 7.5306000000  | 4.7397000000  | 9.2381000000  |
| H71  | 8.2197000000  | 1.6230000000  | 8.3669000000  |
| H72  | 7.5263000000  | 0.0390000000  | 6.5430000000  |
| H73  | 5.0597000000  | 0.2626000000  | 6.3508000000  |
| H74  | 4.2678000000  | 1.6579000000  | 12.6096000000 |
| H75  | 2.1753000000  | 0.4063000000  | 12.1858000000 |
| H76  | 1.7429000000  | 0.6114000000  | 9.6934000000  |
| H77  | 4.9402000000  | 6.3893000000  | 9.0670000000  |
| H78  | 3.0856000000  | 6.6417000000  | 7.4168000000  |
| H79  | 2.4053000000  | 4.2780000000  | 6.7641000000  |
| H80  | 10.1232000000 | 2.8315000000  | 9.0512000000  |
| H81  | 12.1649000000 | 3.1454000000  | 7.6694000000  |
| H82  | 12.9930000000 | 5.4475000000  | 8.1485000000  |
| H83  | 10.2212000000 | 5.6301000000  | 14.2230000000 |
| H84  | 12.3868000000 | 6.8181000000  | 14.6335000000 |
| H85  | 13.1926000000 | 7.5609000000  | 12.3885000000 |
| H86  | 7.0385000000  | 7.7332000000  | 9.7171000000  |
| H87  | 8.0374000000  | 9.5675000000  | 8.3932000000  |
| H88  | 10.5210000000 | 9.3008000000  | 8.5933000000  |
| H89  | 7.8449000000  | 4.5714000000  | 15.1152000000 |
| H90  | 9.0896000000  | 4.9387000000  | 17.0339000000 |
| H91  | 10.0467000000 | 3.0756000000  | 18.1287000000 |
| H92  | 10.0410000000 | 1.0177000000  | 17.1444000000 |
| H93  | 8.9175000000  | 0.6853000000  | 15.1152000000 |
| H94  | 8.1233000000  | -0.5848000000 | 10.6593000000 |
| H95  | 9.1752000000  | -1.6476000000 | 8.9354000000  |
| H96  | 11.3921000000 | -1.2475000000 | 8.5538000000  |
| H97  | 12.5814000000 | 0.1888000000  | 9.8171000000  |
| H98  | 11.5280000000 | 1.2783000000  | 11.6963000000 |
| H99  | 3.9963000000  | 8.8371000000  | 10.9567000000 |
| H100 | 3.6498000000  | 11.0038000000 | 11.8200000000 |
| H101 | 4.8120000000  | 11.6953000000 | 13.6808000000 |
| H102 | 6.2852000000  | 10.2159000000 | 14.7678000000 |
| H103 | 6.5180000000  | 8.0143000000  | 13.8940000000 |
| H104 | 4.8615000000  | 3.2542000000  | 14.4177000000 |
| H105 | 2.7210000000  | 2.5155000000  | 15.0231000000 |
| H106 | 1.0405000000  | 4.0646000000  | 15.3836000000 |
| H107 | 1.4114000000  | 6.3257000000  | 15.0652000000 |
| H108 | 3.6137000000  | 7.1054000000  | 14.4993000000 |

H109 3.1223000000 1.7974000000 7.5800000000  
H110 12.1924000000 7.4603000000 9.8408000000

17. ZOCPEM

Fe1 1.3330000000 12.1700000000 2.6960000000  
Fe2 2.7530000000 11.8050000000 -0.0590000000  
N3 1.3060000000 12.7600000000 4.8880000000  
N4 -0.6270000000 13.1300000000 2.8640000000  
N5 0.1430000000 10.5270000000 3.5610000000  
N6 2.5310000000 9.9540000000 -1.1850000000  
N7 1.8260000000 12.5860000000 -1.9090000000  
N8 4.5370000000 11.9420000000 -1.4740000000  
O9 1.2920000000 11.6840000000 0.9650000000  
O10 3.0780000000 11.2770000000 3.2030000000  
O11 4.0460000000 10.9280000000 1.2410000000  
O12 2.1960000000 13.9800000000 2.4070000000  
O13 3.2930000000 13.6730000000 0.4880000000  
C14 0.0930000000 13.6210000000 5.1500000000  
C15 -0.5030000000 14.1450000000 3.9060000000  
C16 -1.6720000000 12.1060000000 3.1380000000  
C17 -1.1980000000 10.7340000000 2.9620000000  
C18 0.1450000000 10.5680000000 5.0520000000  
C19 1.1980000000 11.4670000000 5.5980000000  
C20 2.5180000000 13.4230000000 5.3400000000  
C21 -0.9750000000 13.7960000000 1.6140000000  
C22 0.6700000000 9.2050000000 3.1440000000  
C23 1.6420000000 10.2040000000 -2.3570000000  
C24 0.9820000000 11.4970000000 -2.3320000000  
C25 2.8120000000 12.9450000000 -2.9370000000  
C26 4.1910000000 12.9960000000 -2.4180000000  
C27 4.7020000000 10.6430000000 -2.1670000000  
C28 3.8830000000 9.5440000000 -1.6020000000  
C29 1.9330000000 8.9130000000 -0.3310000000  
C30 0.9800000000 13.7290000000 -1.6390000000  
C31 5.7930000000 12.3060000000 -0.7910000000  
C32 4.0150000000 10.8440000000 2.4850000000  
C33 5.2010000000 10.1790000000 3.2010000000  
C34 6.2480000000 11.2710000000 3.3830000000  
C35 5.6800000000 8.9880000000 2.3800000000  
C36 4.7980000000 9.6770000000 4.6140000000  
C37 2.9420000000 14.3670000000 1.4820000000  
C38 3.4610000000 15.8000000000 1.5490000000  
C39 4.6970000000 15.7240000000 2.3910000000  
C40 2.4010000000 16.6830000000 2.1540000000  
C41 3.8590000000 16.3210000000 0.1650000000  
H42 0.3560000000 14.3620000000 5.7010000000  
H43 -0.5640000000 13.0960000000 5.6110000000  
H44 0.0490000000 14.8580000000 3.5760000000  
H45 -1.3780000000 14.4850000000 4.1050000000  
H46 -2.4060000000 12.2530000000 2.5370000000  
H47 -1.9730000000 12.2130000000 4.0420000000  
H48 -1.8190000000 10.1360000000 3.3850000000  
H49 -1.1530000000 10.5390000000 2.0240000000  
H50 -0.7120000000 10.8820000000 5.3490000000  
H51 0.2950000000 9.6800000000 5.3820000000  
H52 2.0450000000 11.0180000000 5.5350000000  
H53 0.9990000000 11.6440000000 6.5190000000  
H54 2.5310000000 14.2710000000 4.8900000000  
H55 3.2850000000 12.9100000000 5.0790000000  
H56 2.5370000000 13.5650000000 6.2890000000  
H57 -1.0920000000 13.1590000000 0.9090000000  
H58 -0.2800000000 14.4130000000 1.3750000000  
H59 -1.7960000000 14.2760000000 1.7520000000  
H60 0.5760000000 9.2580000000 2.1920000000  
H61 0.1450000000 8.4750000000 3.4790000000  
H62 1.5930000000 9.0650000000 3.3680000000

|      |              |               |               |
|------|--------------|---------------|---------------|
| H63  | 0.9680000000 | 9.5210000000  | -2.3780000000 |
| H64  | 2.1750000000 | 10.1520000000 | -3.1550000000 |
| H65  | 0.2350000000 | 11.4420000000 | -1.7310000000 |
| H66  | 0.6650000000 | 11.6890000000 | -3.2180000000 |
| H67  | 2.7750000000 | 12.2910000000 | -3.6410000000 |
| H68  | 2.5830000000 | 13.8070000000 | -3.2930000000 |
| H69  | 4.3100000000 | 13.8390000000 | -1.9760000000 |
| H70  | 4.7940000000 | 12.9390000000 | -3.1650000000 |
| H71  | 4.4560000000 | 10.7580000000 | -3.0880000000 |
| H72  | 5.6260000000 | 10.3890000000 | -2.1120000000 |
| H73  | 4.3400000000 | 9.1910000000  | -0.8330000000 |
| H74  | 3.7990000000 | 8.8570000000  | -2.2670000000 |
| H75  | 1.0510000000 | 9.1830000000  | -0.0670000000 |
| H76  | 2.4530000000 | 8.7110000000  | 0.4500000000  |
| H77  | 1.8760000000 | 8.1340000000  | -0.8880000000 |
| H78  | 1.5620000000 | 14.4040000000 | -1.2810000000 |
| H79  | 0.3400000000 | 13.4730000000 | -0.9710000000 |
| H80  | 0.5190000000 | 14.0780000000 | -2.4050000000 |
| H81  | 6.1110000000 | 11.6200000000 | -0.1990000000 |
| H82  | 5.5930000000 | 13.0980000000 | -0.2850000000 |
| H83  | 6.4680000000 | 12.5050000000 | -1.4420000000 |
| H84  | 5.6589000000 | 9.2117000000  | 5.0941000000  |
| H85  | 4.4582000000 | 10.5196000000 | 5.2162000000  |
| H86  | 3.9936000000 | 8.9468000000  | 4.5250000000  |
| H87  | 7.1204000000 | 10.8579000000 | 3.8893000000  |
| H88  | 6.5438000000 | 11.6577000000 | 2.4078000000  |
| H89  | 5.8298000000 | 12.0797000000 | 3.9823000000  |
| H90  | 6.5215000000 | 8.5132000000  | 2.8845000000  |
| H91  | 4.8678000000 | 8.2688000000  | 2.2741000000  |
| H92  | 5.9938000000 | 9.3288000000  | 1.3934000000  |
| H93  | 5.1328000000 | 16.7184000000 | 2.4881000000  |
| H94  | 4.4411000000 | 15.3419000000 | 3.3792000000  |
| H95  | 5.4180000000 | 15.0563000000 | 1.9194000000  |
| H96  | 4.2238000000 | 17.3444000000 | 0.2525000000  |
| H97  | 4.6452000000 | 15.6898000000 | -0.2491000000 |
| H98  | 2.9917000000 | 16.3001000000 | -0.4949000000 |
| H99  | 2.7669000000 | 17.7085000000 | 2.2042000000  |
| H100 | 1.5028000000 | 16.6480000000 | 1.5374000000  |
| H101 | 2.1652000000 | 16.3323000000 | 3.1587000000  |

18. YOCHKAC

|     |              |               |               |
|-----|--------------|---------------|---------------|
| Fe1 | 5.7990000000 | 0.5660000000  | 0.9280000000  |
| O2  | 6.3870000000 | -1.1970000000 | 0.4580000000  |
| N3  | 4.5810000000 | -0.3560000000 | 2.5010000000  |
| N4  | 3.7540000000 | 0.2320000000  | -0.0030000000 |
| N5  | 4.8640000000 | 2.3850000000  | 1.8640000000  |
| N6  | 7.0980000000 | 0.6640000000  | 2.7660000000  |
| C7  | 3.7080000000 | -1.3540000000 | 1.8260000000  |
| C8  | 3.0540000000 | -0.7280000000 | 0.6310000000  |
| C9  | 1.8470000000 | -1.2120000000 | 0.1570000000  |
| C10 | 1.3340000000 | -0.7160000000 | -1.0280000000 |
| C11 | 2.0520000000 | 0.2770000000  | -1.6650000000 |
| C12 | 3.2450000000 | 0.7580000000  | -1.1410000000 |
| C13 | 3.9650000000 | 1.8900000000  | -1.7900000000 |
| C14 | 3.7830000000 | 0.6570000000  | 3.2500000000  |
| C15 | 4.0320000000 | 2.0840000000  | 2.8680000000  |
| C16 | 3.3530000000 | 3.0570000000  | 3.5900000000  |
| C17 | 3.5560000000 | 4.3860000000  | 3.2580000000  |
| C18 | 4.4180000000 | 4.6980000000  | 2.2330000000  |
| C19 | 5.0750000000 | 3.6860000000  | 1.5350000000  |
| C20 | 5.9440000000 | 4.0600000000  | 0.3830000000  |
| C21 | 5.5430000000 | -1.0810000000 | 3.3970000000  |
| C22 | 6.7420000000 | -0.2550000000 | 3.7010000000  |
| C23 | 7.4810000000 | -0.4800000000 | 4.8530000000  |
| C24 | 8.6540000000 | 0.2280000000  | 5.0220000000  |
| C25 | 9.0400000000 | 1.1670000000  | 4.1000000000  |

|      |               |               |               |
|------|---------------|---------------|---------------|
| C26  | 8.2270000000  | 1.3980000000  | 2.9750000000  |
| C27  | 8.5900000000  | 2.4640000000  | 2.0090000000  |
| H28  | 4.2360000000  | -2.0950000000 | 1.5460000000  |
| H29  | 3.0410000000  | -1.6520000000 | 2.4330000000  |
| H30  | 1.3760000000  | -1.8800000000 | 0.6410000000  |
| H31  | 0.5200000000  | -1.0450000000 | -1.3880000000 |
| H32  | 1.7220000000  | 0.6400000000  | -2.4780000000 |
| H33  | 4.8560000000  | 1.6270000000  | -1.9880000000 |
| H34  | 3.5210000000  | 2.1280000000  | -2.5970000000 |
| H35  | 3.9770000000  | 2.6370000000  | -1.2040000000 |
| H36  | 2.8620000000  | 0.4710000000  | 3.1020000000  |
| H37  | 3.9810000000  | 0.5610000000  | 4.1740000000  |
| H38  | 2.7640000000  | 2.8170000000  | 4.2940000000  |
| H39  | 3.1040000000  | 5.0740000000  | 3.7340000000  |
| H40  | 4.5660000000  | 5.6070000000  | 1.9990000000  |
| H41  | 6.8260000000  | 3.7360000000  | 0.5340000000  |
| H42  | 5.5990000000  | 3.6730000000  | -0.4140000000 |
| H43  | 5.9640000000  | 5.0050000000  | 0.2940000000  |
| H44  | 5.1020000000  | -1.2980000000 | 4.2120000000  |
| H45  | 5.8210000000  | -1.8810000000 | 2.9670000000  |
| H46  | 7.1880000000  | -1.1020000000 | 5.5070000000  |
| H47  | 9.1980000000  | 0.0630000000  | 5.7850000000  |
| H48  | 9.8460000000  | 1.6570000000  | 4.2190000000  |
| H49  | 9.4030000000  | 2.8740000000  | 2.2810000000  |
| H50  | 8.6980000000  | 2.0850000000  | 1.1460000000  |
| H51  | 7.8990000000  | 3.1160000000  | 1.9830000000  |
| Fe52 | 7.4230000000  | -0.5660000000 | -0.9280000000 |
| O53  | 6.8350000000  | 1.1970000000  | -0.4580000000 |
| N54  | 8.6410000000  | 0.3560000000  | -2.5010000000 |
| C55  | 9.5140000000  | 1.3540000000  | -1.8260000000 |
| C56  | 10.1680000000 | 0.7280000000  | -0.6310000000 |
| N57  | 9.4680000000  | -0.2320000000 | 0.0030000000  |
| N58  | 8.3580000000  | -2.3850000000 | -1.8640000000 |
| C59  | 9.1900000000  | -2.0840000000 | -2.8680000000 |
| C60  | 9.4390000000  | -0.6570000000 | -3.2500000000 |
| C61  | 7.6790000000  | 1.0810000000  | -3.3970000000 |
| C62  | 6.4800000000  | 0.2550000000  | -3.7010000000 |
| N63  | 6.1240000000  | -0.6640000000 | -2.7660000000 |
| C64  | 4.9950000000  | -1.3980000000 | -2.9750000000 |
| C65  | 4.1820000000  | -1.1670000000 | -4.1000000000 |
| C66  | 4.5680000000  | -0.2280000000 | -5.0220000000 |
| C67  | 5.7410000000  | 0.4800000000  | -4.8530000000 |
| H68  | 6.0340000000  | 1.1020000000  | -5.5070000000 |
| H69  | 4.0240000000  | -0.0630000000 | -5.7850000000 |
| H70  | 3.3760000000  | -1.6570000000 | -4.2190000000 |
| C71  | 4.6320000000  | -2.4640000000 | -2.0090000000 |
| H72  | 3.8190000000  | -2.8740000000 | -2.2810000000 |
| H73  | 4.5240000000  | -2.0850000000 | -1.1460000000 |
| H74  | 5.3230000000  | -3.1160000000 | -1.9830000000 |
| H75  | 8.1200000000  | 1.2980000000  | -4.2120000000 |
| H76  | 7.4010000000  | 1.8810000000  | -2.9670000000 |
| H77  | 10.3600000000 | -0.4710000000 | -3.1020000000 |
| H78  | 9.2410000000  | -0.5610000000 | -4.1740000000 |
| C79  | 9.8690000000  | -3.0570000000 | -3.5900000000 |
| C80  | 9.6660000000  | -4.3860000000 | -3.2580000000 |
| C81  | 8.8040000000  | -4.6980000000 | -2.2330000000 |
| C82  | 8.1470000000  | -3.6860000000 | -1.5350000000 |
| C83  | 7.2780000000  | -4.0600000000 | -0.3830000000 |
| H84  | 6.3960000000  | -3.7360000000 | -0.5340000000 |
| H85  | 7.6230000000  | -3.6730000000 | 0.4140000000  |
| H86  | 7.2580000000  | -5.0050000000 | -0.2940000000 |
| H87  | 8.6560000000  | -5.6070000000 | -1.9990000000 |
| H88  | 10.1180000000 | -5.0740000000 | -3.7340000000 |
| H89  | 10.4580000000 | -2.8170000000 | -4.2940000000 |
| C90  | 9.9770000000  | -0.7580000000 | 1.1410000000  |
| C91  | 11.1700000000 | -0.2770000000 | 1.6650000000  |



|      |               |               |               |
|------|---------------|---------------|---------------|
| C92  | 11.8880000000 | 0.7160000000  | 1.0280000000  |
| C93  | 11.3750000000 | 1.2120000000  | -0.1570000000 |
| H94  | 11.8460000000 | 1.8800000000  | -0.6410000000 |
| H95  | 12.7020000000 | 1.0450000000  | 1.3880000000  |
| H96  | 11.5000000000 | -0.6400000000 | 2.4780000000  |
| C97  | 9.2570000000  | -1.8900000000 | 1.7900000000  |
| H98  | 8.3660000000  | -1.6270000000 | 1.9880000000  |
| H99  | 9.7010000000  | -2.1280000000 | 2.5970000000  |
| H100 | 9.2450000000  | -2.6370000000 | 1.2040000000  |
| H101 | 8.9860000000  | 2.0950000000  | -1.5460000000 |
| H102 | 10.1810000000 | 1.6520000000  | -2.4330000000 |

19. RABHAD

|     |               |               |               |
|-----|---------------|---------------|---------------|
| Fe1 | 8.2078000000  | 3.9605000000  | 11.8650000000 |
| Fe2 | 8.1222000000  | 6.0402000000  | 9.1216000000  |
| O3  | 7.5164000000  | 4.3454000000  | 10.0092000000 |
| O4  | 10.0005000000 | 5.0286000000  | 9.0820000000  |
| O5  | 10.0365000000 | 3.6205000000  | 10.8559000000 |
| O6  | 8.7433000000  | 8.1225000000  | 11.0289000000 |
| O7  | 8.9535000000  | 6.3377000000  | 13.3112000000 |
| N8  | 7.5925000000  | 1.8563000000  | 11.2049000000 |
| N9  | 7.5631000000  | 4.7859000000  | 7.2990000000  |
| N10 | 8.8292000000  | 7.1630000000  | 7.4765000000  |
| N11 | 9.3336000000  | 7.3261000000  | 5.3157000000  |
| N12 | 6.1082000000  | 6.6447000000  | 8.7512000000  |
| N13 | 4.3394000000  | 6.6795000000  | 7.4158000000  |
| N14 | 8.9261000000  | 2.6820000000  | 13.3946000000 |
| N15 | 9.4249000000  | 0.6431000000  | 14.1200000000 |
| N16 | 6.2160000000  | 3.8287000000  | 12.5706000000 |
| N17 | 4.3873000000  | 2.5966000000  | 12.9667000000 |
| N18 | 8.5056000000  | 7.1992000000  | 10.3764000000 |
| N19 | 8.6202000000  | 5.4878000000  | 12.6101000000 |
| C20 | 7.6254000000  | 1.9315000000  | 9.7330000000  |
| C21 | 7.1615000000  | 3.2643000000  | 9.1731000000  |
| C22 | 7.6573000000  | 3.3881000000  | 7.7664000000  |
| C23 | 8.5441000000  | 5.0835000000  | 6.2398000000  |
| C24 | 8.8902000000  | 6.5340000000  | 6.3172000000  |
| C25 | 9.2644000000  | 8.4633000000  | 7.2398000000  |
| C26 | 9.4305000000  | 9.5541000000  | 8.0865000000  |
| C27 | 9.8665000000  | 10.7382000000 | 7.5221000000  |
| C28 | 10.1682000000 | 10.8223000000 | 6.1427000000  |
| C29 | 10.0352000000 | 9.7674000000  | 5.3050000000  |
| C30 | 9.5741000000  | 8.5736000000  | 5.8786000000  |
| C31 | 9.5077000000  | 6.9865000000  | 3.9044000000  |
| C32 | 8.4341000000  | 7.5449000000  | 3.0334000000  |
| C33 | 6.1868000000  | 5.1286000000  | 6.7906000000  |
| C34 | 5.5476000000  | 6.1676000000  | 7.6435000000  |
| C35 | 5.1859000000  | 7.5285000000  | 9.2671000000  |
| C36 | 5.1953000000  | 8.2996000000  | 10.4143000000 |
| C37 | 4.1160000000  | 9.1134000000  | 10.7102000000 |
| C38 | 3.0207000000  | 9.1586000000  | 9.8104000000  |
| C39 | 2.9744000000  | 8.3845000000  | 8.6890000000  |
| C40 | 4.0743000000  | 7.5687000000  | 8.4371000000  |
| C41 | 3.4581000000  | 6.3919000000  | 6.2701000000  |
| C42 | 2.4427000000  | 5.3149000000  | 6.6328000000  |
| C43 | 8.6061000000  | 0.9120000000  | 11.7315000000 |
| C44 | 8.9702000000  | 1.3896000000  | 13.0927000000 |
| C45 | 9.3848000000  | 2.7727000000  | 14.7163000000 |
| C46 | 9.5635000000  | 3.8675000000  | 15.5479000000 |
| C47 | 10.0352000000 | 3.6663000000  | 16.8135000000 |
| C48 | 10.3403000000 | 2.3726000000  | 17.2444000000 |
| C49 | 10.1839000000 | 1.2798000000  | 16.4417000000 |
| C50 | 9.6938000000  | 1.5086000000  | 15.1610000000 |
| C51 | 9.6430000000  | -0.8106000000 | 14.1534000000 |
| C52 | 8.5162000000  | -1.5263000000 | 14.8499000000 |
| C53 | 6.2593000000  | 1.5099000000  | 11.6966000000 |

|      |               |               |               |
|------|---------------|---------------|---------------|
| C54  | 5.6253000000  | 2.6593000000  | 12.4159000000 |
| C55  | 5.2924000000  | 4.6260000000  | 13.2414000000 |
| C56  | 5.3470000000  | 5.9399000000  | 13.6526000000 |
| C57  | 4.2442000000  | 6.4373000000  | 14.3430000000 |
| C58  | 3.1364000000  | 5.6654000000  | 14.6040000000 |
| C59  | 3.0612000000  | 4.3672000000  | 14.1837000000 |
| C60  | 4.1507000000  | 3.8506000000  | 13.5130000000 |
| C61  | 3.4733000000  | 1.4633000000  | 12.9728000000 |
| C62  | 2.4569000000  | 1.5427000000  | 11.8696000000 |
| C63  | 10.4579000000 | 4.0650000000  | 9.7664000000  |
| C64  | 11.7046000000 | 3.3703000000  | 9.1913000000  |
| C65  | 12.3097000000 | 2.3416000000  | 9.8756000000  |
| C66  | 13.4082000000 | 1.6930000000  | 9.3278000000  |
| C67  | 13.8944000000 | 2.0770000000  | 8.1002000000  |
| C68  | 13.2818000000 | 3.1081000000  | 7.3870000000  |
| C69  | 12.1870000000 | 3.7541000000  | 7.9363000000  |
| H70  | 8.5196000000  | 1.7830000000  | 9.4473000000  |
| H71  | 7.0644000000  | 1.2493000000  | 9.3863000000  |
| H72  | 6.2121000000  | 3.2381000000  | 9.1351000000  |
| H73  | 7.1318000000  | 2.8347000000  | 7.2019000000  |
| H74  | 8.5640000000  | 3.1084000000  | 7.7315000000  |
| H75  | 9.3264000000  | 4.5599000000  | 6.3688000000  |
| H76  | 8.1689000000  | 4.8888000000  | 5.3900000000  |
| H77  | 9.2510000000  | 9.4891000000  | 9.0168000000  |
| H78  | 9.9647000000  | 11.5080000000 | 8.0699000000  |
| H79  | 10.4761000000 | 11.6509000000 | 5.7921000000  |
| H80  | 10.2447000000 | 9.8323000000  | 4.3809000000  |
| H81  | 10.3440000000 | 7.3301000000  | 3.6116000000  |
| H82  | 9.5057000000  | 6.0408000000  | 3.8179000000  |
| H83  | 8.4282000000  | 8.4934000000  | 3.1062000000  |
| H84  | 8.5966000000  | 7.2969000000  | 2.1305000000  |
| H85  | 7.5913000000  | 7.2019000000  | 3.3096000000  |
| H86  | 6.2572000000  | 5.4569000000  | 5.9014000000  |
| H87  | 5.6485000000  | 4.3469000000  | 6.7967000000  |
| H88  | 5.9430000000  | 8.2712000000  | 11.0001000000 |
| H89  | 4.1098000000  | 9.6357000000  | 11.5054000000 |
| H90  | 2.2974000000  | 9.7452000000  | 9.9955000000  |
| H91  | 2.2250000000  | 8.4002000000  | 8.1063000000  |
| H92  | 2.9968000000  | 7.1849000000  | 6.0243000000  |
| H93  | 3.9839000000  | 6.0922000000  | 5.5387000000  |
| H94  | 1.9101000000  | 5.6136000000  | 7.3597000000  |
| H95  | 1.8855000000  | 5.1411000000  | 5.8832000000  |
| H96  | 2.8990000000  | 4.5189000000  | 6.8787000000  |
| H97  | 8.2424000000  | 0.0349000000  | 11.7800000000 |
| H98  | 9.3722000000  | 0.9074000000  | 11.1700000000 |
| H99  | 9.3612000000  | 4.7444000000  | 15.2414000000 |
| H100 | 10.1547000000 | 4.4047000000  | 17.3992000000 |
| H101 | 10.6687000000 | 2.2498000000  | 18.1276000000 |
| H102 | 10.3979000000 | 0.4048000000  | 16.7437000000 |
| H103 | 9.7091000000  | -1.1327000000 | 13.2626000000 |
| H104 | 10.4534000000 | -0.9909000000 | 14.6147000000 |
| H105 | 8.4494000000  | -1.2149000000 | 15.7452000000 |
| H106 | 7.7014000000  | -1.3541000000 | 14.3916000000 |
| H107 | 8.6863000000  | -2.4600000000 | 14.8499000000 |
| H108 | 5.7119000000  | 1.2679000000  | 10.9591000000 |
| H109 | 6.3318000000  | 0.7747000000  | 12.2930000000 |
| H110 | 6.1052000000  | 6.4834000000  | 13.4735000000 |
| H111 | 4.2575000000  | 7.3378000000  | 14.6435000000 |
| H112 | 2.4100000000  | 6.0409000000  | 15.0866000000 |
| H113 | 2.2860000000  | 3.8403000000  | 14.3446000000 |
| H114 | 3.9762000000  | 0.6642000000  | 12.8681000000 |
| H115 | 3.0180000000  | 1.4418000000  | 13.8074000000 |
| H116 | 1.9409000000  | 2.3334000000  | 11.9697000000 |
| H117 | 2.9028000000  | 1.5587000000  | 11.0304000000 |
| H118 | 1.8864000000  | 0.7851000000  | 11.9106000000 |
| H119 | 11.9764000000 | 2.0751000000  | 10.7239000000 |

|      |               |              |              |
|------|---------------|--------------|--------------|
| H120 | 13.8244000000 | 0.9835000000 | 9.8013000000 |
| H121 | 14.6521000000 | 1.6361000000 | 7.7345000000 |
| H122 | 13.6121000000 | 3.3633000000 | 6.5342000000 |
| H123 | 11.7644000000 | 4.4585000000 | 7.4598000000 |

20. GIDKIN02

|      |              |               |               |
|------|--------------|---------------|---------------|
| Fe1  | 4.9301000000 | 1.3525000000  | 2.7045000000  |
| S2   | 6.6466000000 | 0.0000000000  | 2.1554000000  |
| O3   | 4.4293000000 | 3.0205000000  | 0.4825000000  |
| N4   | 4.6067000000 | 2.2288000000  | 1.3230000000  |
| C5   | 8.0502000000 | 0.0000000000  | 3.3887000000  |
| C6   | 8.8531000000 | -1.2569000000 | 3.0804000000  |
| H7   | 8.3651000000 | -2.0094000000 | 3.2616000000  |
| H8   | 9.6306000000 | -1.3073000000 | 3.6727000000  |
| H9   | 9.1364000000 | -1.2633000000 | 2.1420000000  |
| C10  | 7.5981000000 | 0.0000000000  | 4.8362000000  |
| H11  | 8.4281000000 | 0.0000000000  | 5.4415000000  |
| H12  | 7.1302000000 | -0.7675000000 | 5.0412000000  |
| Fe13 | 4.9301000000 | -1.3525000000 | 2.7045000000  |
| S14  | 3.2137000000 | 0.0000000000  | 3.2536000000  |
| O15  | 5.4310000000 | 3.0205000000  | 4.9265000000  |
| O16  | 4.4293000000 | -3.0205000000 | 0.4825000000  |
| O17  | 5.4310000000 | -3.0205000000 | 4.9265000000  |
| N18  | 5.2536000000 | 2.2288000000  | 4.0860000000  |
| N19  | 4.6067000000 | -2.2288000000 | 1.3230000000  |
| N20  | 5.2536000000 | -2.2288000000 | 4.0860000000  |
| C21  | 1.8101000000 | 0.0000000000  | 2.0203000000  |
| C22  | 1.0072000000 | -1.2569000000 | 2.3286000000  |
| C23  | 1.0072000000 | 1.2569000000  | 2.3286000000  |
| C24  | 8.8531000000 | 1.2569000000  | 3.0804000000  |
| H25  | 1.4952000000 | -2.0094000000 | 2.1474000000  |
| H26  | 1.4952000000 | 2.0094000000  | 2.1474000000  |
| H27  | 8.3651000000 | 2.0094000000  | 3.2616000000  |
| H28  | 0.2297000000 | -1.3073000000 | 1.7363000000  |
| H29  | 0.2297000000 | 1.3073000000  | 1.7363000000  |
| H30  | 9.6306000000 | 1.3073000000  | 3.6727000000  |
| H31  | 0.7239000000 | -1.2633000000 | 3.2670000000  |
| H32  | 0.7239000000 | 1.2633000000  | 3.2670000000  |
| H33  | 9.1364000000 | 1.2633000000  | 2.1420000000  |
| C34  | 2.2622000000 | 0.0000000000  | 0.5728000000  |
| H35  | 1.4322000000 | 0.0000000000  | -0.0325000000 |
| H36  | 2.7301000000 | -0.7675000000 | 0.3678000000  |
| H37  | 2.7301000000 | 0.7675000000  | 0.3678000000  |
| H38  | 7.1302000000 | 0.7675000000  | 5.0412000000  |

21. YOYMOX

|     |               |               |              |
|-----|---------------|---------------|--------------|
| Fe1 | 0.5238000000  | -0.0290000000 | 1.7253000000 |
| C12 | 2.6159000000  | 6.3325000000  | 1.2050000000 |
| C13 | -0.0423000000 | 4.8487000000  | 1.9864000000 |
| C14 | 5.2221000000  | 4.6746000000  | 0.7447000000 |
| C15 | 5.0820000000  | 1.5342000000  | 0.7949000000 |
| O6  | 0.0000000000  | 0.0000000000  | 0.0000000000 |
| O7  | 0.2813000000  | 1.8963000000  | 2.1933000000 |
| O8  | 2.4385000000  | 0.5072000000  | 1.5995000000 |
| N9  | -1.3623000000 | -0.8592000000 | 2.4893000000 |
| N10 | 1.0763000000  | -2.1840000000 | 1.8007000000 |
| N11 | 0.9533000000  | -0.4227000000 | 4.0327000000 |
| C12 | -1.3705000000 | -2.2370000000 | 1.9303000000 |
| C13 | -0.1459000000 | -2.9246000000 | 1.8123000000 |
| C14 | 1.8648000000  | -2.4187000000 | 2.9825000000 |
| C15 | 1.6494000000  | -1.7071000000 | 4.1372000000 |
| C16 | -0.3522000000 | -0.4101000000 | 4.6536000000 |
| C17 | -1.4149000000 | -0.8416000000 | 3.9399000000 |
| C18 | -2.5144000000 | -0.1110000000 | 1.9071000000 |
| C19 | 1.8708000000  | -2.5184000000 | 0.6035000000 |
| C20 | 1.7752000000  | 0.6485000000  | 4.6072000000 |

|      |               |               |               |
|------|---------------|---------------|---------------|
| C21  | 2.5325000000  | 1.8269000000  | 1.5589000000  |
| C22  | 1.3678000000  | 2.5777000000  | 1.8587000000  |
| C23  | 1.4185000000  | 3.9567000000  | 1.7311000000  |
| C24  | 2.6008000000  | 4.5951000000  | 1.3752000000  |
| C25  | 3.7317000000  | 3.8747000000  | 1.1450000000  |
| C26  | 3.6873000000  | 2.4843000000  | 1.2030000000  |
| H27  | -1.7470000000 | -2.1865000000 | 1.0502000000  |
| H28  | -1.9443000000 | -2.7619000000 | 2.4951000000  |
| H29  | -0.0940000000 | -3.5227000000 | 2.5608000000  |
| H30  | -0.1784000000 | -3.4318000000 | 0.9980000000  |
| H31  | 2.7749000000  | -2.2446000000 | 2.7349000000  |
| H32  | 1.7637000000  | -3.3486000000 | 3.2010000000  |
| H33  | 1.1235000000  | -2.2685000000 | 4.7116000000  |
| H34  | 2.5016000000  | -1.5405000000 | 4.5453000000  |
| H35  | -0.5388000000 | 0.4984000000  | 4.9012000000  |
| H36  | -0.2933000000 | -0.9513000000 | 5.4447000000  |
| H37  | -1.5709000000 | -1.7487000000 | 4.2107000000  |
| H38  | -2.1677000000 | -0.2990000000 | 4.1875000000  |
| H39  | 1.4330000000  | -2.3278000000 | -0.2302000000 |
| H40  | 2.0644000000  | -3.4571000000 | 0.6537000000  |
| H41  | 2.6894000000  | -2.0200000000 | 0.6557000000  |
| H42  | 2.6248000000  | 0.7406000000  | 4.1700000000  |
| H43  | 1.9137000000  | 0.5034000000  | 5.5472000000  |
| H44  | 1.2597000000  | 1.4484000000  | 4.4795000000  |
| Fe45 | -0.5238000000 | 0.0290000000  | -1.7253000000 |
| O46  | -0.2813000000 | -1.8963000000 | -2.1933000000 |
| O47  | -2.4385000000 | -0.5072000000 | -1.5995000000 |
| N48  | 1.3623000000  | 0.8592000000  | -2.4893000000 |
| N49  | -1.0763000000 | 2.1840000000  | -1.8007000000 |
| N50  | -0.9533000000 | 0.4227000000  | -4.0327000000 |
| C51  | -1.3678000000 | -2.5777000000 | -1.8587000000 |
| C52  | -2.5325000000 | -1.8269000000 | -1.5589000000 |
| C53  | 1.3705000000  | 2.2370000000  | -1.9303000000 |
| C54  | 1.4149000000  | 0.8416000000  | -3.9399000000 |
| C55  | 2.5144000000  | 0.1110000000  | -1.9071000000 |
| C56  | 0.1459000000  | 2.9246000000  | -1.8123000000 |
| C57  | -1.8648000000 | 2.4187000000  | -2.9825000000 |
| C58  | -1.8708000000 | 2.5184000000  | -0.6035000000 |
| C59  | -1.6494000000 | 1.7071000000  | -4.1372000000 |
| C60  | 0.3522000000  | 0.4101000000  | -4.6536000000 |
| C61  | -1.7752000000 | -0.6485000000 | -4.6072000000 |
| C62  | -1.4185000000 | -3.9567000000 | -1.7311000000 |
| C63  | -3.6873000000 | -2.4843000000 | -1.2030000000 |
| H64  | 1.7470000000  | 2.1865000000  | -1.0502000000 |
| H65  | 1.9443000000  | 2.7619000000  | -2.4951000000 |
| H66  | 1.5709000000  | 1.7487000000  | -4.2107000000 |
| H67  | 2.1677000000  | 0.2990000000  | -4.1875000000 |
| H68  | 0.0940000000  | 3.5227000000  | -2.5608000000 |
| H69  | 0.1784000000  | 3.4318000000  | -0.9980000000 |
| H70  | -2.7749000000 | 2.2446000000  | -2.7349000000 |
| H71  | -1.7637000000 | 3.3486000000  | -3.2010000000 |
| H72  | -1.4330000000 | 2.3278000000  | 0.2302000000  |
| H73  | -2.0644000000 | 3.4571000000  | -0.6537000000 |
| H74  | -2.6894000000 | 2.0200000000  | -0.6557000000 |
| H75  | -1.1235000000 | 2.2685000000  | -4.7116000000 |
| H76  | -2.5016000000 | 1.5405000000  | -4.5453000000 |
| H77  | 0.5388000000  | -0.4984000000 | -4.9012000000 |
| H78  | 0.2933000000  | 0.9513000000  | -5.4447000000 |
| H79  | -2.6248000000 | -0.7406000000 | -4.1700000000 |
| H80  | -1.9137000000 | -0.5034000000 | -5.5472000000 |
| H81  | -1.2597000000 | -1.4484000000 | -4.4795000000 |
| C182 | 0.0423000000  | -4.8487000000 | -1.9864000000 |
| C83  | -2.6008000000 | -4.5951000000 | -1.3752000000 |
| C184 | -5.0820000000 | -1.5342000000 | -0.7949000000 |
| C85  | -3.7317000000 | -3.8747000000 | -1.1450000000 |
| C186 | -2.6159000000 | -6.3325000000 | -1.2050000000 |

|      |               |               |               |
|------|---------------|---------------|---------------|
| C187 | -5.2221000000 | -4.6746000000 | -0.7447000000 |
| H88  | -3.4476000000 | -0.5257000000 | 2.2884000000  |
| H89  | -2.4438000000 | 0.9403000000  | 2.1861000000  |
| H90  | -2.4947000000 | -0.2003000000 | 0.8209000000  |
| H91  | 3.4476000000  | 0.5257000000  | -2.2884000000 |
| H92  | 2.4947000000  | 0.2003000000  | -0.8209000000 |
| H93  | 2.4438000000  | -0.9403000000 | -2.1861000000 |

22. JIGNUI

|     |               |               |               |
|-----|---------------|---------------|---------------|
| Fe1 | 2.6760000000  | 4.6740000000  | 6.1500000000  |
| Fe2 | 0.6580000000  | 6.9650000000  | 5.3480000000  |
| O3  | 1.7210000000  | 6.1420000000  | 6.5470000000  |
| O4  | 1.1680000000  | 3.6940000000  | 5.1570000000  |
| O5  | -0.2970000000 | 5.3050000000  | 4.6620000000  |
| C6  | 0.0760000000  | 4.0940000000  | 4.6770000000  |
| C7  | -0.8510000000 | 3.0940000000  | 4.0890000000  |
| O8  | 3.4920000000  | 5.3920000000  | 4.4230000000  |
| O9  | 1.9800000000  | 6.9370000000  | 3.7960000000  |
| C10 | 3.0870000000  | 6.3600000000  | 3.7050000000  |
| C11 | 4.0700000000  | 6.8470000000  | 2.6550000000  |
| P12 | 4.8350000000  | 2.6220000000  | 8.2600000000  |
| N13 | 3.7400000000  | 2.8120000000  | 5.6980000000  |
| C14 | 4.5030000000  | 2.1190000000  | 6.5420000000  |
| N15 | 4.9570000000  | 0.9980000000  | 5.9690000000  |
| C16 | 3.7200000000  | 2.0930000000  | 4.5330000000  |
| C17 | 4.4660000000  | 0.9720000000  | 4.6890000000  |
| C18 | 5.8180000000  | -0.0230000000 | 6.5450000000  |
| N19 | 2.2270000000  | 3.6480000000  | 8.0080000000  |
| C20 | 3.1110000000  | 2.9680000000  | 8.7390000000  |
| C21 | 1.0940000000  | 3.7690000000  | 8.7670000000  |
| C22 | 1.2920000000  | 3.1500000000  | 9.9630000000  |
| N23 | 2.5680000000  | 2.6420000000  | 9.9360000000  |
| C24 | 3.2210000000  | 1.9450000000  | 11.0400000000 |
| N25 | 4.5260000000  | 5.1870000000  | 7.1580000000  |
| C26 | 5.2230000000  | 4.3790000000  | 7.9440000000  |
| C27 | 5.1170000000  | 6.4210000000  | 7.2510000000  |
| C28 | 6.1420000000  | 6.3520000000  | 8.1210000000  |
| N29 | 6.2240000000  | 5.0640000000  | 8.5580000000  |
| C30 | 7.1620000000  | 4.5480000000  | 9.5160000000  |
| P31 | -1.2810000000 | 10.0150000000 | 5.7850000000  |
| N32 | -0.6960000000 | 7.9760000000  | 3.9650000000  |
| C33 | -1.3580000000 | 9.1120000000  | 4.2090000000  |
| C34 | -1.0490000000 | 7.6120000000  | 2.6950000000  |
| C35 | -1.8840000000 | 8.5250000000  | 2.1850000000  |
| N36 | -2.0910000000 | 9.4560000000  | 3.1260000000  |
| C37 | -2.9910000000 | 10.5950000000 | 3.0150000000  |
| C38 | -1.5560000000 | 8.5610000000  | 6.8460000000  |
| N39 | -0.9530000000 | 7.3810000000  | 6.7150000000  |
| C40 | -1.4720000000 | 6.5700000000  | 7.6890000000  |
| C41 | -2.3860000000 | 7.2680000000  | 8.4160000000  |
| N42 | -2.4210000000 | 8.5170000000  | 7.8780000000  |
| C43 | -3.2210000000 | 9.6360000000  | 8.3950000000  |
| C44 | 0.5370000000  | 10.0200000000 | 5.9400000000  |
| N45 | 1.3130000000  | 8.9530000000  | 5.7560000000  |
| C46 | 2.5980000000  | 9.3770000000  | 5.9540000000  |
| C47 | 2.5920000000  | 10.7050000000 | 6.2560000000  |
| N48 | 1.2910000000  | 11.0900000000 | 6.2260000000  |
| C49 | 0.7980000000  | 12.4290000000 | 6.5610000000  |
| H50 | -0.4630000000 | 2.2190000000  | 4.1580000000  |
| H51 | -1.0020000000 | 3.3040000000  | 3.1640000000  |
| H52 | -1.6850000000 | 3.1140000000  | 4.5620000000  |
| H53 | 3.6800000000  | 7.5730000000  | 2.1640000000  |
| H54 | 4.2790000000  | 6.1290000000  | 2.0530000000  |
| H55 | 4.8740000000  | 7.1470000000  | 3.0860000000  |
| H56 | 3.2500000000  | 2.3420000000  | 3.7340000000  |
| H57 | 4.6210000000  | 0.2900000000  | 4.0290000000  |

|     |               |               |               |
|-----|---------------|---------------|---------------|
| H58 | 6.0360000000  | 0.2130000000  | 7.4480000000  |
| H59 | 6.6230000000  | -0.0920000000 | 6.0280000000  |
| H60 | 5.3590000000  | -0.8670000000 | 6.5370000000  |
| H61 | 0.2880000000  | 4.2180000000  | 8.4980000000  |
| H62 | 0.6630000000  | 3.0840000000  | 10.6850000000 |
| H63 | 4.1090000000  | 1.6930000000  | 10.7780000000 |
| H64 | 2.7170000000  | 1.1600000000  | 11.2660000000 |
| H65 | 3.2670000000  | 2.5270000000  | 11.8020000000 |
| H66 | 4.8430000000  | 7.2090000000  | 6.7720000000  |
| H67 | 6.7120000000  | 7.0750000000  | 8.3870000000  |
| H68 | 7.7590000000  | 5.2510000000  | 9.7870000000  |
| H69 | 7.6680000000  | 3.8350000000  | 9.1210000000  |
| H70 | 6.6890000000  | 4.2200000000  | 10.2840000000 |
| H71 | -0.7460000000 | 6.8210000000  | 2.2390000000  |
| H72 | -2.2660000000 | 8.5170000000  | 1.3040000000  |
| H73 | -2.9610000000 | 11.1080000000 | 3.8250000000  |
| H74 | -3.8860000000 | 10.2820000000 | 2.8680000000  |
| H75 | -2.7180000000 | 11.1470000000 | 2.2780000000  |
| H76 | -1.2290000000 | 5.6520000000  | 7.8360000000  |
| H77 | -2.9000000000 | 6.9470000000  | 9.1580000000  |
| H78 | -3.7500000000 | 9.3330000000  | 9.1380000000  |
| H79 | -3.8010000000 | 9.9640000000  | 7.7040000000  |
| H80 | -2.6380000000 | 10.3410000000 | 8.6860000000  |
| H81 | 3.3810000000  | 8.8250000000  | 5.8880000000  |
| H82 | 3.3540000000  | 11.2600000000 | 6.4540000000  |
| H83 | 1.5430000000  | 13.0120000000 | 6.7210000000  |
| H84 | 0.2530000000  | 12.3810000000 | 7.3500000000  |
| H85 | 0.2760000000  | 12.7710000000 | 5.8320000000  |

### 23. VOFLOR

|     |               |               |               |
|-----|---------------|---------------|---------------|
| Fe1 | 0.0000000000  | 0.0000000000  | 0.0000000000  |
| N2  | -0.1970000000 | 1.9624000000  | -0.3596000000 |
| N3  | -1.8606000000 | -0.0292000000 | 0.7304000000  |
| N4  | -0.7280000000 | -0.3992000000 | -1.8137000000 |
| N5  | -2.2389000000 | -1.2186000000 | -5.6461000000 |
| C6  | 0.7310000000  | 2.7694000000  | -0.9698000000 |
| C7  | -1.2963000000 | 2.7607000000  | -0.1414000000 |
| C8  | -2.7515000000 | 1.0295000000  | 0.8306000000  |
| C9  | -2.5454000000 | -1.1237000000 | 1.1880000000  |
| C10 | 0.1859000000  | 4.0932000000  | -1.1780000000 |
| C11 | -1.0619000000 | 4.0843000000  | -0.6480000000 |
| C12 | -4.0286000000 | 0.5718000000  | 1.3550000000  |
| C13 | -3.9035000000 | -0.7625000000 | 1.5510000000  |
| C14 | 2.0254000000  | 2.3898000000  | -1.3161000000 |
| C15 | -2.4765000000 | 2.3290000000  | 0.4498000000  |
| C16 | 0.8619000000  | 5.1919000000  | -1.9540000000 |
| C17 | -2.0774000000 | 5.1895000000  | -0.6458000000 |
| C18 | -5.2366000000 | 1.4400000000  | 1.6044000000  |
| C19 | -4.9475000000 | -1.7380000000 | 2.0487000000  |
| C20 | 0.6123000000  | 5.0212000000  | -3.4583000000 |
| C21 | -3.1345000000 | 5.0241000000  | -1.7503000000 |
| C22 | -5.2621000000 | 2.0309000000  | 3.0185000000  |
| C23 | -4.8941000000 | -1.9756000000 | 3.5440000000  |
| C24 | -1.7038000000 | 0.3461000000  | -2.3771000000 |
| C25 | -2.2268000000 | 0.1106000000  | -3.6297000000 |
| C26 | -1.7625000000 | -0.9716000000 | -4.4058000000 |
| C27 | -0.7480000000 | -1.7561000000 | -3.8123000000 |
| C28 | -0.2818000000 | -1.4329000000 | -2.5642000000 |
| C29 | -1.8687000000 | -2.4280000000 | -6.3598000000 |
| C30 | -3.2681000000 | -0.3775000000 | -6.2396000000 |
| H31 | -2.0523000000 | 1.0789000000  | -1.8806000000 |
| H32 | -2.9064000000 | 0.6844000000  | -3.9738000000 |
| H33 | -0.3885000000 | -2.5056000000 | -4.2744000000 |
| H34 | 0.4100000000  | -1.9785000000 | -2.1979000000 |
| H35 | -2.2942000000 | -2.4360000000 | -7.2105000000 |
| H36 | -2.1495000000 | -3.1877000000 | -5.8610000000 |

|      |               |               |               |
|------|---------------|---------------|---------------|
| H37  | -0.9194000000 | -2.4553000000 | -6.4745000000 |
| H38  | -3.4787000000 | -0.6983000000 | -7.1080000000 |
| H39  | -2.9462000000 | 0.5145000000  | -6.3008000000 |
| H40  | -4.0540000000 | -0.3958000000 | -5.6973000000 |
| H41  | 1.8021000000  | 5.1643000000  | -1.7870000000 |
| H42  | 0.5089000000  | 6.0305000000  | -1.6735000000 |
| H43  | 1.0449000000  | 5.7223000000  | -3.9326000000 |
| H44  | -0.3279000000 | 5.0503000000  | -3.6308000000 |
| H45  | 0.9645000000  | 4.1852000000  | -3.7444000000 |
| H46  | -1.6222000000 | 6.0143000000  | -0.7783000000 |
| H47  | -2.5210000000 | 5.1987000000  | 0.1948000000  |
| H48  | -3.7559000000 | 5.7463000000  | -1.7113000000 |
| H49  | -3.6005000000 | 4.2050000000  | -1.6256000000 |
| H50  | -2.7018000000 | 5.0196000000  | -2.5976000000 |
| H51  | -6.0242000000 | 0.9166000000  | 1.4820000000  |
| H52  | -5.2286000000 | 2.1545000000  | 0.9787000000  |
| H53  | -6.0444000000 | 2.5695000000  | 3.1231000000  |
| H54  | -4.4826000000 | 2.5628000000  | 3.1532000000  |
| H55  | -5.2778000000 | 1.3269000000  | 3.6564000000  |
| H56  | -4.8100000000 | -2.5693000000 | 1.6089000000  |
| H57  | -5.8128000000 | -1.3978000000 | 1.8304000000  |
| H58  | -5.5739000000 | -2.5961000000 | 3.7901000000  |
| H59  | -5.0382000000 | -1.1554000000 | 4.0005000000  |
| H60  | -4.0373000000 | -2.3259000000 | 3.7789000000  |
| H61  | 2.5804000000  | 3.0681000000  | -1.6868000000 |
| H62  | -3.1420000000 | 2.9964000000  | 0.5990000000  |
| N63  | 0.1970000000  | -1.9624000000 | 0.3596000000  |
| C64  | -0.7310000000 | -2.7694000000 | 0.9698000000  |
| C65  | -0.1859000000 | -4.0932000000 | 1.1780000000  |
| C66  | 1.0619000000  | -4.0843000000 | 0.6480000000  |
| C67  | 1.2963000000  | -2.7607000000 | 0.1414000000  |
| C68  | 2.4765000000  | -2.3290000000 | -0.4498000000 |
| C69  | 2.7515000000  | -1.0295000000 | -0.8306000000 |
| N70  | 1.8606000000  | 0.0292000000  | -0.7304000000 |
| N71  | 0.7280000000  | 0.3992000000  | 1.8137000000  |
| C72  | 1.7038000000  | -0.3461000000 | 2.3771000000  |
| C73  | 2.2268000000  | -0.1106000000 | 3.6297000000  |
| C74  | 1.7625000000  | 0.9716000000  | 4.4058000000  |
| N75  | 2.2389000000  | 1.2186000000  | 5.6461000000  |
| C76  | 1.8687000000  | 2.4280000000  | 6.3598000000  |
| H77  | 2.2942000000  | 2.4360000000  | 7.2105000000  |
| H78  | 2.1495000000  | 3.1877000000  | 5.8610000000  |
| H79  | 0.9194000000  | 2.4553000000  | 6.4745000000  |
| C80  | 3.2681000000  | 0.3775000000  | 6.2396000000  |
| H81  | 3.4787000000  | 0.6983000000  | 7.1080000000  |
| H82  | 2.9462000000  | -0.5145000000 | 6.3008000000  |
| H83  | 4.0540000000  | 0.3958000000  | 5.6973000000  |
| C84  | 0.7480000000  | 1.7561000000  | 3.8123000000  |
| C85  | 0.2818000000  | 1.4329000000  | 2.5642000000  |
| H86  | -0.4100000000 | 1.9785000000  | 2.1979000000  |
| H87  | 0.3885000000  | 2.5056000000  | 4.2744000000  |
| H88  | 2.9064000000  | -0.6844000000 | 3.9738000000  |
| H89  | 2.0523000000  | -1.0789000000 | 1.8806000000  |
| C90  | 2.5454000000  | 1.1237000000  | -1.1880000000 |
| C91  | 3.9035000000  | 0.7625000000  | -1.5510000000 |
| C92  | 4.0286000000  | -0.5718000000 | -1.3550000000 |
| C93  | 5.2366000000  | -1.4400000000 | -1.6044000000 |
| C94  | 5.2621000000  | -2.0309000000 | -3.0185000000 |
| H95  | 6.0444000000  | -2.5695000000 | -3.1231000000 |
| H96  | 4.4826000000  | -2.5628000000 | -3.1532000000 |
| H97  | 5.2778000000  | -1.3269000000 | -3.6564000000 |
| H98  | 6.0242000000  | -0.9166000000 | -1.4820000000 |
| H99  | 5.2286000000  | -2.1545000000 | -0.9787000000 |
| C100 | 4.9475000000  | 1.7380000000  | -2.0487000000 |
| C101 | 4.8941000000  | 1.9756000000  | -3.5440000000 |
| H102 | 5.5739000000  | 2.5961000000  | -3.7901000000 |

|      |               |               |               |
|------|---------------|---------------|---------------|
| H103 | 5.0382000000  | 1.1554000000  | -4.0005000000 |
| H104 | 4.0373000000  | 2.3259000000  | -3.7789000000 |
| H105 | 4.8100000000  | 2.5693000000  | -1.6089000000 |
| H106 | 5.8128000000  | 1.3978000000  | -1.8304000000 |
| H107 | 3.1420000000  | -2.9964000000 | -0.5990000000 |
| C108 | 2.0774000000  | -5.1895000000 | 0.6458000000  |
| C109 | 3.1345000000  | -5.0241000000 | 1.7503000000  |
| H110 | 3.7559000000  | -5.7463000000 | 1.7113000000  |
| H111 | 3.6005000000  | -4.2050000000 | 1.6256000000  |
| H112 | 2.7018000000  | -5.0196000000 | 2.5976000000  |
| H113 | 1.6222000000  | -6.0143000000 | 0.7783000000  |
| H114 | 2.5210000000  | -5.1987000000 | -0.1948000000 |
| C115 | -0.8619000000 | -5.1919000000 | 1.9540000000  |
| C116 | -0.6123000000 | -5.0212000000 | 3.4583000000  |
| H117 | -1.0449000000 | -5.7223000000 | 3.9326000000  |
| H118 | 0.3279000000  | -5.0503000000 | 3.6308000000  |
| H119 | -0.9645000000 | -4.1852000000 | 3.7444000000  |
| H120 | -1.8021000000 | -5.1643000000 | 1.7870000000  |
| H121 | -0.5089000000 | -6.0305000000 | 1.6735000000  |
| C122 | -2.0254000000 | -2.3898000000 | 1.3161000000  |
| H123 | -2.5804000000 | -3.0681000000 | 1.6868000000  |

#### 24. WEDXAF

|     |              |               |               |
|-----|--------------|---------------|---------------|
| Fe1 | 5.8847000000 | 3.6244000000  | 9.6840000000  |
| S2  | 6.4382000000 | 1.4597000000  | 9.1890000000  |
| S3  | 6.3896000000 | 4.3298000000  | 11.7751000000 |
| S4  | 6.9797000000 | 5.0405000000  | 8.2905000000  |
| O5  | 3.0237000000 | 3.7452000000  | 9.4249000000  |
| N6  | 4.1866000000 | 3.6514000000  | 9.4754000000  |
| C7  | 4.9278000000 | 2.2615000000  | 12.8838000000 |
| H8  | 4.2393000000 | 1.9463000000  | 13.5690000000 |
| H9  | 5.7984000000 | 1.8658000000  | 13.1156000000 |
| H10 | 4.6238000000 | 2.0071000000  | 12.0098000000 |
| C11 | 5.6628000000 | 4.1103000000  | 14.3851000000 |
| H12 | 5.0377000000 | 3.8139000000  | 15.0509000000 |
| H13 | 5.7621000000 | 5.0643000000  | 14.4415000000 |
| H14 | 6.5134000000 | 3.6904000000  | 14.5351000000 |
| C15 | 3.8461000000 | 4.4949000000  | 12.7928000000 |
| H16 | 3.1926000000 | 4.1931000000  | 13.4278000000 |
| H17 | 3.5239000000 | 4.3344000000  | 11.9028000000 |
| H18 | 3.9999000000 | 5.4346000000  | 12.9120000000 |
| C19 | 5.1504000000 | 3.7348000000  | 13.0067000000 |
| C20 | 8.5091000000 | 1.2592000000  | 11.0156000000 |
| H21 | 9.4236000000 | 1.0519000000  | 11.1640000000 |
| H22 | 8.0057000000 | 0.5957000000  | 11.5252000000 |
| H23 | 8.3066000000 | 2.1252000000  | 11.3662000000 |
| C24 | 9.0868000000 | 2.0928000000  | 8.7368000000  |
| H25 | 9.9965000000 | 1.9195000000  | 8.9345000000  |
| H26 | 8.9220000000 | 3.0178000000  | 8.9954000000  |
| H27 | 8.9055000000 | 2.0035000000  | 7.8123000000  |
| C28 | 8.4873000000 | -0.3034000000 | 9.0796000000  |
| H29 | 9.4198000000 | -0.4830000000 | 9.1961000000  |
| H30 | 8.3032000000 | -0.4293000000 | 8.1348000000  |
| H31 | 7.9764000000 | -0.8980000000 | 9.6182000000  |
| C32 | 8.2278000000 | 1.1268000000  | 9.5325000000  |
| C33 | 7.1202000000 | 7.7369000000  | 8.4410000000  |
| H34 | 6.7151000000 | 8.6027000000  | 8.3519000000  |
| H35 | 7.8777000000 | 7.6760000000  | 7.8554000000  |
| H36 | 7.4060000000 | 7.6116000000  | 9.3492000000  |
| C37 | 4.9006000000 | 6.8335000000  | 8.9360000000  |
| H38 | 4.5062000000 | 7.6904000000  | 8.7532000000  |
| H39 | 5.1679000000 | 6.7941000000  | 9.8560000000  |
| H40 | 4.2590000000 | 6.1430000000  | 8.7576000000  |
| C41 | 5.7827000000 | 6.8353000000  | 6.5979000000  |
| H42 | 5.3167000000 | 7.6635000000  | 6.4731000000  |
| H43 | 5.2352000000 | 6.1108000000  | 6.2873000000  |



|     |              |              |              |
|-----|--------------|--------------|--------------|
| H44 | 6.6038000000 | 6.8514000000 | 6.1015000000 |
| C45 | 6.0854000000 | 6.6419000000 | 8.0686000000 |

25. VOCBAQ

|     |              |              |              |
|-----|--------------|--------------|--------------|
| Fe1 | 5.3897000000 | 2.9179000000 | 3.3439000000 |
| C12 | 7.0882000000 | 1.4535000000 | 4.1314000000 |
| C13 | 3.7609000000 | 1.4064000000 | 4.1734000000 |
| C14 | 3.6737000000 | 4.5069000000 | 2.9302000000 |
| C15 | 7.0474000000 | 4.4650000000 | 2.7828000000 |
| C16 | 5.3231000000 | 2.0080000000 | 1.2007000000 |
| O7  | 5.4927000000 | 3.7637000000 | 5.3506000000 |
| H8  | 5.3019000000 | 3.2697000000 | 6.1216000000 |
| H9  | 4.9612000000 | 4.5148000000 | 5.4634000000 |

26. CANDAW10

|     |               |               |                |
|-----|---------------|---------------|----------------|
| Fe1 | 0.0000000000  | -5.2990000000 | -9.4410000000  |
| S2  | 1.4110000000  | -6.5040000000 | -10.7480000000 |
| C3  | 1.8620000000  | -5.3910000000 | -12.0920000000 |
| C4  | 2.9890000000  | -5.2870000000 | -11.6850000000 |
| S5  | 1.2050000000  | -3.8880000000 | -8.1340000000  |
| S6  | -1.4110000000 | -4.0940000000 | -10.7480000000 |
| S7  | -1.2050000000 | -6.7100000000 | -8.1340000000  |
| C8  | -1.8620000000 | -5.2070000000 | -12.0920000000 |
| C9  | -0.0920000000 | -7.1610000000 | -6.7900000000  |
| C10 | -2.9890000000 | -5.3110000000 | -11.6850000000 |
| C11 | 0.0120000000  | -8.2880000000 | -7.1970000000  |
| H12 | 1.7194000000  | -5.8970000000 | -13.0468000000 |
| H13 | 1.2325000000  | -4.5020000000 | -12.0550000000 |
| H14 | 3.5530000000  | -4.6238000000 | -12.3409000000 |
| H15 | 2.9749000000  | -4.8739000000 | -10.6764000000 |
| H16 | 3.4619000000  | -6.2689000000 | -11.6683000000 |
| H17 | -1.7194000000 | -4.7010000000 | -13.0468000000 |
| H18 | -1.2325000000 | -6.0960000000 | -12.0550000000 |
| H19 | -3.5530000000 | -5.9742000000 | -12.3409000000 |
| H20 | -2.9749000000 | -5.7241000000 | -10.6764000000 |
| H21 | -3.4619000000 | -4.3291000000 | -11.6683000000 |
| H22 | 0.6752000000  | -8.8520000000 | -6.5411000000  |
| H23 | -0.9699000000 | -8.7609000000 | -7.2137000000  |
| H24 | 0.4251000000  | -8.2739000000 | -8.2056000000  |
| H25 | 0.7970000000  | -6.5315000000 | -6.8270000000  |
| H26 | -0.5980000000 | -7.0184000000 | -5.8352000000  |
| C27 | 0.0873000000  | -3.4351000000 | -6.7843000000  |
| H28 | 0.6099000000  | -2.7334000000 | -6.0869000000  |
| H29 | -0.2174000000 | -4.3564000000 | -6.2273000000  |
| C30 | -1.1522000000 | -2.7537000000 | -7.3572000000  |
| H31 | -1.6747000000 | -3.4555000000 | -8.0547000000  |
| H32 | -1.8431000000 | -2.4738000000 | -6.5229000000  |
| H33 | -0.8474000000 | -1.8324000000 | -7.9142000000  |

27. SONMUE

|     |               |              |              |
|-----|---------------|--------------|--------------|
| Fe1 | 7.2080000000  | 4.6763000000 | 6.8119000000 |
| S2  | 7.1500000000  | 5.8941000000 | 4.8228000000 |
| N3  | 7.3899000000  | 5.6977000000 | 8.1707000000 |
| S4  | 9.1079000000  | 3.3275000000 | 6.9531000000 |
| N5  | 5.7572000000  | 3.7517000000 | 6.7628000000 |
| C6  | 8.0933000000  | 7.4160000000 | 5.0219000000 |
| C7  | 9.0925000000  | 2.2024000000 | 5.5449000000 |
| C8  | 9.1639000000  | 7.5408000000 | 5.9456000000 |
| H9  | 9.3998000000  | 6.8006000000 | 6.4920000000 |
| C10 | 9.8818000000  | 8.7494000000 | 6.0635000000 |
| H11 | 10.5864000000 | 8.8089000000 | 6.6979000000 |
| O12 | 7.3453000000  | 6.3195000000 | 9.1911000000 |
| C13 | 9.2213000000  | 0.4197000000 | 3.2688000000 |
| C14 | 7.7830000000  | 8.5477000000 | 4.2146000000 |
| H15 | 7.0696000000  | 8.4931000000 | 3.5901000000 |
| O16 | 4.6759000000  | 3.2718000000 | 6.9591000000 |

|     |               |               |              |
|-----|---------------|---------------|--------------|
| C17 | 8.1084000000  | 2.2392000000  | 4.5282000000 |
| H18 | 7.3899000000  | 2.8576000000  | 4.5920000000 |
| C19 | 9.5803000000  | 9.8771000000  | 5.2605000000 |
| C20 | 8.5204000000  | 9.7536000000  | 4.3275000000 |
| H21 | 8.3011000000  | 10.4891000000 | 3.7687000000 |
| C22 | 10.2039000000 | 0.3805000000  | 4.2879000000 |
| H23 | 10.9167000000 | -0.2453000000 | 4.2227000000 |
| C24 | 10.1481000000 | 1.2510000000  | 5.4010000000 |
| H25 | 10.8255000000 | 1.2019000000  | 6.0652000000 |
| C26 | 8.1818000000  | 1.3669000000  | 3.4180000000 |
| H27 | 7.5089000000  | 1.4196000000  | 2.7496000000 |
| C28 | 10.3798000000 | 11.1833000000 | 5.4045000000 |
| H29 | 10.6286000000 | 11.3139000000 | 6.3437000000 |
| H30 | 9.8311000000  | 11.9363000000 | 5.1046000000 |
| H31 | 11.1910000000 | 11.1330000000 | 4.8564000000 |
| C32 | 9.2574000000  | -0.5123000000 | 2.0516000000 |
| H33 | 8.6215000000  | -1.2448000000 | 2.1835000000 |
| H34 | 10.1610000000 | -0.8769000000 | 1.9464000000 |
| H35 | 9.0141000000  | -0.0092000000 | 1.2471000000 |

28. CELVEU

|     |               |               |               |
|-----|---------------|---------------|---------------|
| Fe1 | 5.4388000000  | 1.5280000000  | 2.9971000000  |
| C12 | 5.3827000000  | 3.3488000000  | 1.7261000000  |
| S3  | 7.6890000000  | 0.7352000000  | 3.1554000000  |
| S4  | 3.1670000000  | 1.1505000000  | 3.6277000000  |
| O5  | 5.2954000000  | 0.0535000000  | 1.7360000000  |
| O6  | 5.5788000000  | 2.0831000000  | 4.8568000000  |
| C7  | 7.5085000000  | -0.5354000000 | 2.0228000000  |
| C8  | 8.6453000000  | -1.4606000000 | 1.7953000000  |
| C9  | 9.9063000000  | -0.9655000000 | 1.5233000000  |
| C10 | 10.9787000000 | -1.8183000000 | 1.3749000000  |
| C11 | 10.8088000000 | -3.1778000000 | 1.5085000000  |
| C12 | 9.5693000000  | -3.6695000000 | 1.8077000000  |
| C13 | 8.4798000000  | -2.8282000000 | 1.9437000000  |
| N14 | 6.3601000000  | -0.7064000000 | 1.4170000000  |
| C15 | 6.0630000000  | -1.6349000000 | 0.3215000000  |
| C16 | 3.2941000000  | 1.9088000000  | 5.1461000000  |
| C17 | 2.0651000000  | 2.0749000000  | 5.9696000000  |
| C18 | 0.9496000000  | 2.6827000000  | 5.4033000000  |
| C19 | -0.2395000000 | 2.7641000000  | 6.1155000000  |
| C20 | -0.3058000000 | 2.2443000000  | 7.3816000000  |
| C21 | 0.7889000000  | 1.6390000000  | 7.9503000000  |
| C22 | 1.9671000000  | 1.5626000000  | 7.2530000000  |
| N23 | 4.4624000000  | 2.2912000000  | 5.5912000000  |
| C24 | 4.7669000000  | 2.9656000000  | 6.8499000000  |
| H25 | 9.9760000000  | -0.0987000000 | 1.4590000000  |
| H26 | 11.8435000000 | -1.5214000000 | 1.1870000000  |
| H27 | 11.4682000000 | -3.7090000000 | 1.4343000000  |
| H28 | 9.3883000000  | -4.5150000000 | 1.9536000000  |
| H29 | 7.6538000000  | -3.1333000000 | 2.1761000000  |
| H30 | 5.4827000000  | -2.2780000000 | 0.5935000000  |
| H31 | 5.6109000000  | -1.1185000000 | -0.3462000000 |
| H32 | 6.8934000000  | -2.0231000000 | -0.0742000000 |
| H33 | 1.0409000000  | 2.9853000000  | 4.5007000000  |
| H34 | -1.0027000000 | 3.2156000000  | 5.6629000000  |
| H35 | -1.1218000000 | 2.3274000000  | 7.8885000000  |
| H36 | 0.7401000000  | 1.2994000000  | 8.8035000000  |
| H37 | 2.7267000000  | 1.1596000000  | 7.5918000000  |
| H38 | 5.2772000000  | 2.2698000000  | 7.3939000000  |
| H39 | 5.2821000000  | 3.6679000000  | 6.6768000000  |
| H40 | 4.0044000000  | 3.2567000000  | 7.2950000000  |

29. KAJBIH

|     |              |               |               |
|-----|--------------|---------------|---------------|
| Fe1 | 5.4779000000 | 9.7198000000  | 15.5570000000 |
| O2  | 6.2435000000 | 9.2935000000  | 17.0466000000 |
| O3  | 3.2767000000 | 12.9222000000 | 16.3920000000 |

|      |               |               |               |
|------|---------------|---------------|---------------|
| O4   | 1.8739000000  | 8.0083000000  | 16.3011000000 |
| O5   | 5.1932000000  | 6.1163000000  | 13.7032000000 |
| O6   | 8.4053000000  | 10.0245000000 | 12.8895000000 |
| N7   | 4.9955000000  | 11.5176000000 | 15.7783000000 |
| N8   | 3.6371000000  | 9.3898000000  | 15.8693000000 |
| N9   | 5.7095000000  | 8.2152000000  | 14.4146000000 |
| N10  | 6.7823000000  | 10.4922000000 | 14.4532000000 |
| C11  | 5.9261000000  | 12.4583000000 | 15.3465000000 |
| C12  | 6.9725000000  | 11.8589000000 | 14.6010000000 |
| C13  | 7.9999000000  | 12.6614000000 | 14.0896000000 |
| C14  | 7.9584000000  | 14.0206000000 | 14.3078000000 |
| C15  | 6.9205000000  | 14.6074000000 | 15.0033000000 |
| C16  | 5.9036000000  | 13.8475000000 | 15.5260000000 |
| C17  | 3.7234000000  | 11.8037000000 | 16.2193000000 |
| C18  | 2.8814000000  | 10.5424000000 | 16.4170000000 |
| C19  | 2.6352000000  | 10.3718000000 | 17.9126000000 |
| C20  | 1.5585000000  | 10.7806000000 | 15.6647000000 |
| C21  | 3.0413000000  | 8.1927000000  | 15.8897000000 |
| C22  | 3.8352000000  | 6.9338000000  | 15.4647000000 |
| C23  | 4.4710000000  | 6.4072000000  | 16.7534000000 |
| C24  | 2.8359000000  | 5.8780000000  | 14.9487000000 |
| C25  | 4.9732000000  | 7.0968000000  | 14.4305000000 |
| C26  | 6.8091000000  | 8.3030000000  | 13.4282000000 |
| C27  | 7.9211000000  | 7.2824000000  | 13.6782000000 |
| C28  | 6.2943000000  | 8.2278000000  | 11.9917000000 |
| C29  | 7.4418000000  | 9.6847000000  | 13.5645000000 |
| H30  | 8.6285000000  | 12.2125000000 | 13.5464000000 |
| H31  | 8.7351000000  | 14.5697000000 | 14.0237000000 |
| H32  | 6.9220000000  | 15.6230000000 | 15.1601000000 |
| H33  | 5.2001000000  | 14.2187000000 | 16.0238000000 |
| H34  | 3.5105000000  | 10.1311000000 | 18.3421000000 |
| H35  | 1.9911000000  | 9.6546000000  | 18.0694000000 |
| H36  | 2.3534000000  | 11.2345000000 | 18.2512000000 |
| H37  | 1.6819000000  | 10.8082000000 | 14.7283000000 |
| H38  | 0.8734000000  | 10.1060000000 | 16.0238000000 |
| H39  | 1.2313000000  | 11.6107000000 | 15.9329000000 |
| H40  | 5.1606000000  | 7.2473000000  | 17.1830000000 |
| H41  | 5.0162000000  | 5.5922000000  | 16.6148000000 |
| H42  | 3.8698000000  | 6.1940000000  | 17.4103000000 |
| H43  | 3.4578000000  | 5.0405000000  | 14.6828000000 |
| H44  | 2.0436000000  | 5.8680000000  | 15.7283000000 |
| H45  | 2.4952000000  | 6.1188000000  | 14.0919000000 |
| H46  | 7.5214000000  | 6.4448000000  | 13.5918000000 |
| H47  | 8.2774000000  | 7.3476000000  | 14.6373000000 |
| H48  | 8.7010000000  | 7.4479000000  | 13.0236000000 |
| H49  | 6.9960000000  | 8.6014000000  | 11.3871000000 |
| H50  | 5.9022000000  | 7.3726000000  | 11.8417000000 |
| H51  | 5.5868000000  | 8.7519000000  | 11.8872000000 |
| Fe52 | 7.0091000000  | 9.7198000000  | 18.5362000000 |
| O53  | 9.2103000000  | 12.9222000000 | 17.7012000000 |
| O54  | 10.6131000000 | 8.0083000000  | 17.7921000000 |
| O55  | 7.2938000000  | 6.1163000000  | 20.3900000000 |
| O56  | 4.0818000000  | 10.0245000000 | 21.2037000000 |
| N57  | 7.4915000000  | 11.5176000000 | 18.3149000000 |
| N58  | 8.8499000000  | 9.3898000000  | 18.2240000000 |
| N59  | 6.7776000000  | 8.2152000000  | 19.6786000000 |
| N60  | 5.7047000000  | 10.4922000000 | 19.6400000000 |
| C61  | 6.5609000000  | 12.4583000000 | 18.7467000000 |
| C62  | 5.5146000000  | 11.8589000000 | 19.4922000000 |
| C63  | 4.4871000000  | 12.6614000000 | 20.0036000000 |
| C64  | 4.5287000000  | 14.0206000000 | 19.7854000000 |
| C65  | 5.5665000000  | 14.6074000000 | 19.0899000000 |
| C66  | 6.5834000000  | 13.8475000000 | 18.5672000000 |
| C67  | 8.7636000000  | 11.8037000000 | 17.8739000000 |
| C68  | 9.6056000000  | 10.5424000000 | 17.6762000000 |
| C69  | 9.8518000000  | 10.3718000000 | 16.1806000000 |

|      |               |               |               |
|------|---------------|---------------|---------------|
| C70  | 10.9285000000 | 10.7806000000 | 18.4285000000 |
| C71  | 9.4457000000  | 8.1927000000  | 18.2035000000 |
| C72  | 8.6519000000  | 6.9338000000  | 18.6285000000 |
| C73  | 8.0161000000  | 6.4072000000  | 17.3398000000 |
| C74  | 9.6511000000  | 5.8780000000  | 19.1445000000 |
| C75  | 7.5138000000  | 7.0968000000  | 19.6627000000 |
| C76  | 5.6780000000  | 8.3030000000  | 20.6650000000 |
| C77  | 4.5659000000  | 7.2824000000  | 20.4150000000 |
| C78  | 6.1927000000  | 8.2278000000  | 22.1015000000 |
| C79  | 5.0452000000  | 9.6847000000  | 20.5287000000 |
| H80  | 3.8585000000  | 12.2125000000 | 20.5468000000 |
| H81  | 3.7519000000  | 14.5697000000 | 20.0695000000 |
| H82  | 5.5650000000  | 15.6230000000 | 18.9331000000 |
| H83  | 7.2869000000  | 14.2187000000 | 18.0694000000 |
| H84  | 8.9765000000  | 10.1311000000 | 15.7511000000 |
| H85  | 10.4959000000 | 9.6546000000  | 16.0238000000 |
| H86  | 10.1336000000 | 11.2345000000 | 15.8420000000 |
| H87  | 10.8052000000 | 10.8082000000 | 19.3649000000 |
| H88  | 11.6137000000 | 10.1060000000 | 18.0694000000 |
| H89  | 11.2557000000 | 11.6107000000 | 18.1603000000 |
| H90  | 7.3264000000  | 7.2473000000  | 16.9102000000 |
| H91  | 7.4709000000  | 5.5922000000  | 17.4784000000 |
| H92  | 8.6172000000  | 6.1940000000  | 16.6829000000 |
| H93  | 9.0292000000  | 5.0405000000  | 19.4104000000 |
| H94  | 10.4434000000 | 5.8680000000  | 18.3649000000 |
| H95  | 9.9918000000  | 6.1188000000  | 20.0013000000 |
| H96  | 4.9656000000  | 6.4448000000  | 20.5014000000 |
| H97  | 4.2096000000  | 7.3476000000  | 19.4559000000 |
| H98  | 3.7861000000  | 7.4479000000  | 21.0696000000 |
| H99  | 5.4910000000  | 8.6014000000  | 22.7061000000 |
| H100 | 6.5848000000  | 7.3726000000  | 22.2515000000 |
| H101 | 6.9003000000  | 8.7519000000  | 22.2060000000 |

### 30. SOCVUB

|     |               |               |               |
|-----|---------------|---------------|---------------|
| Fe1 | 3.5328000000  | 2.5587000000  | 6.7795000000  |
| S2  | 4.4897000000  | 1.1543000000  | 8.3195000000  |
| S3  | 5.2577000000  | 3.8982000000  | 6.9878000000  |
| S4  | 1.6232000000  | 1.3371000000  | 6.3656000000  |
| S5  | 2.8250000000  | 4.0749000000  | 5.3637000000  |
| C6  | 6.2852000000  | 3.2284000000  | 8.2224000000  |
| C7  | 7.4310000000  | 3.9126000000  | 8.6231000000  |
| C8  | 8.2177000000  | 3.3848000000  | 9.6583000000  |
| C9  | 7.8482000000  | 2.1992000000  | 10.2699000000 |
| C10 | 6.7481000000  | 1.4741000000  | 9.8560000000  |
| C11 | 5.9344000000  | 2.0152000000  | 8.8270000000  |
| C12 | 1.2869000000  | 3.5230000000  | 4.7539000000  |
| C13 | 0.5687000000  | 4.3274000000  | 3.8299000000  |
| C14 | -0.6227000000 | 3.8537000000  | 3.2918000000  |
| C15 | -1.1126000000 | 2.5948000000  | 3.6890000000  |
| C16 | -0.4484000000 | 1.8385000000  | 4.6174000000  |
| C17 | 0.7763000000  | 2.2822000000  | 5.1721000000  |
| P18 | 2.3331000000  | 3.3138000000  | 8.6266000000  |
| C19 | 3.3606000000  | 4.1819000000  | 9.8464000000  |
| C20 | 1.4820000000  | 2.0477000000  | 9.5944000000  |
| C21 | 1.0648000000  | 4.5355000000  | 8.2338000000  |
| P22 | 4.4711000000  | 1.0906000000  | 5.2404000000  |
| C23 | 4.2033000000  | -0.6625000000 | 5.5230000000  |
| C24 | 3.8546000000  | 1.3022000000  | 3.5438000000  |
| C25 | 6.2645000000  | 1.2024000000  | 5.0881000000  |
| H26 | 7.6780000000  | 4.7387000000  | 8.1988000000  |
| H27 | 9.0127000000  | 3.8453000000  | 9.9409000000  |
| H28 | 8.3754000000  | 1.8685000000  | 11.0031000000 |
| H29 | 6.5385000000  | 0.6265000000  | 10.2576000000 |
| H30 | 0.9009000000  | 5.1932000000  | 3.5779000000  |
| H31 | -1.1043000000 | 4.3803000000  | 2.6486000000  |
| H32 | -1.9325000000 | 2.2665000000  | 3.3093000000  |

|     |               |               |               |
|-----|---------------|---------------|---------------|
| H33 | -0.8137000000 | 0.9944000000  | 4.8930000000  |
| H34 | 4.0788000000  | 3.6084000000  | 10.1264000000 |
| H35 | 2.8230000000  | 4.4164000000  | 10.6068000000 |
| H36 | 3.7217000000  | 4.9791000000  | 9.4509000000  |
| H37 | 0.9112000000  | 1.5355000000  | 9.0169000000  |
| H38 | 0.9527000000  | 2.4673000000  | 10.2778000000 |
| H39 | 2.1297000000  | 1.4669000000  | 10.0021000000 |
| H40 | 0.4608000000  | 4.1687000000  | 7.5845000000  |
| H41 | 1.4800000000  | 5.3254000000  | 7.8750000000  |
| H42 | 0.5812000000  | 4.7627000000  | 9.0309000000  |
| H43 | 4.4980000000  | -0.8946000000 | 6.4076000000  |
| H44 | 4.6994000000  | -1.1687000000 | 4.8764000000  |
| H45 | 3.2672000000  | -0.8621000000 | 5.4364000000  |
| H46 | 3.9480000000  | 2.2208000000  | 3.2830000000  |
| H47 | 2.9267000000  | 1.0521000000  | 3.5070000000  |
| H48 | 4.3610000000  | 0.7455000000  | 2.9470000000  |
| H49 | 6.5156000000  | 2.1162000000  | 4.9341000000  |
| H50 | 6.5571000000  | 0.6613000000  | 4.3505000000  |
| H51 | 6.6775000000  | 0.8886000000  | 5.8975000000  |

31. SOCWAI

|     |               |               |               |
|-----|---------------|---------------|---------------|
| Fe1 | 0.5432000000  | -0.2506000000 | 9.0522000000  |
| P2  | 0.2290000000  | -2.4362000000 | 9.4319000000  |
| C3  | -0.7191000000 | -2.6977000000 | 10.9451000000 |
| C4  | 1.6620000000  | -3.5081000000 | 9.6237000000  |
| C5  | -0.7231000000 | -3.1873000000 | 8.1202000000  |
| S6  | -0.8547000000 | 0.8008000000  | 10.3639000000 |
| S7  | 2.0232000000  | -0.2777000000 | 10.6564000000 |
| S8  | 2.0534000000  | -0.8578000000 | 7.5951000000  |
| S9  | -0.8437000000 | 0.2163000000  | 7.4266000000  |
| C10 | -0.0746000000 | -0.3741000000 | 5.9715000000  |
| C11 | -0.7236000000 | -0.3485000000 | 4.7373000000  |
| C12 | -0.0864000000 | -0.7782000000 | 3.6057000000  |
| C13 | 1.2344000000  | -1.2458000000 | 3.6871000000  |
| C14 | 1.8780000000  | -1.2787000000 | 4.8942000000  |
| C15 | 1.2383000000  | -0.8454000000 | 6.0451000000  |
| C16 | 1.2170000000  | 0.3537000000  | 12.0805000000 |
| C17 | 1.8166000000  | 0.3259000000  | 13.3457000000 |
| C18 | 1.1564000000  | 0.8783000000  | 14.4191000000 |
| C19 | -0.1121000000 | 1.4124000000  | 14.2757000000 |
| C20 | -0.7348000000 | 1.3949000000  | 13.0532000000 |
| C21 | -0.0847000000 | 0.8505000000  | 11.9430000000 |
| H22 | -1.5093000000 | -2.1534000000 | 10.9238000000 |
| H23 | -0.1840000000 | -2.4544000000 | 11.7046000000 |
| H24 | -0.9690000000 | -3.6221000000 | 11.0129000000 |
| H25 | 2.2291000000  | -3.1690000000 | 10.3193000000 |
| H26 | 2.1503000000  | -3.5329000000 | 8.7964000000  |
| H27 | 1.3719000000  | -4.3952000000 | 9.8504000000  |
| H28 | -1.5131000000 | -2.6649000000 | 7.9633000000  |
| H29 | -0.9745000000 | -4.0795000000 | 8.3721000000  |
| H30 | -0.1961000000 | -3.2173000000 | 7.3181000000  |
| H31 | -1.6333000000 | -0.0453000000 | 4.6830000000  |
| H32 | -0.5403000000 | -0.7760000000 | 2.7610000000  |
| H33 | 1.6976000000  | -1.5323000000 | 2.8966000000  |
| H34 | 2.7775000000  | -1.6090000000 | 4.9504000000  |
| H35 | 2.6861000000  | -0.0658000000 | 13.4581000000 |
| H36 | 1.5761000000  | 0.8893000000  | 15.2833000000 |
| H37 | -0.5585000000 | 1.7990000000  | 15.0333000000 |
| H38 | -1.6184000000 | 1.7566000000  | 12.9582000000 |

The isomer shifts and quadrupole splittings  
For each compound, the order of the isomer shift or quadrupole splitting  
values coincides with the order of the iron atoms given in the  
Cartesian coordinates section. When the compound has two atoms that produce  
one signal in the experiment the theoretical values are averaged and  
the averaged value is shown. Only the absolute values of the quadrupole  
splitting are shown in any case.

---

### B3LYP/Partridge-1

Isomer shift, mm/s

-----  
+2, MUE = 0.0272 (17 points)

|          |      |      |
|----------|------|------|
| FATBOR   | 0.99 | 0.06 |
| YUZKAF10 | 1.36 | 1.07 |
| XIGDIA   | 1.11 |      |
| VUNMIA   | 1.13 |      |
| JOHCEP   | 0.53 |      |
| SISKOU   | 1.28 | 1.17 |
| VUPJOF   | 1.27 |      |
| VUPJUL   | 1.28 | 1.28 |
| PTHPFE10 | 0.70 |      |
| DEDWUE   | 0.67 |      |
| BUYKUB10 | 0.63 |      |
| YEQPOA   | 0.25 |      |
| PTSQFE10 | 0.69 |      |

+3, +4, MUE = 0.0238 (18 points)

|          |       |  |
|----------|-------|--|
| VOCBAQ   | 0.55  |  |
| YOCKAC   | 0.48  |  |
| ZOCPEM   | 0.46  |  |
| SOCWAI   | 0.11  |  |
| CACZIP10 | 0.50  |  |
| WEDXAF   | 0.25  |  |
| GIDKIN02 | 0.14  |  |
| SOCVUB   | 0.17  |  |
| SONMUE   | 0.26  |  |
| CELVEU   | 0.43  |  |
| KAJBIH   | -0.09 |  |
| COCJIN10 | 0.48  |  |
| PIMTAG   | 0.49  |  |
| YOHMOX   | 0.45  |  |
| CANDAW10 | 0.23  |  |
| VOFLOR   | 0.27  |  |
| RABHAD   | 0.61  |  |
| JIGNUI   | 0.50  |  |

all, MUE = 0.0296 (35 points)

|          |      |      |
|----------|------|------|
| VOCBAQ   | 0.60 |      |
| FATBOR   | 0.97 | 0.04 |
| YUZKAF10 | 1.35 | 1.06 |
| YOCKAC   | 0.51 |      |
| XIGDIA   | 1.10 |      |
| ZOCPEM   | 0.48 |      |
| SOCWAI   | 0.09 |      |
| VUNMIA   | 1.12 |      |
| CACZIP10 | 0.54 |      |
| WEDXAF   | 0.25 |      |
| GIDKIN02 | 0.12 |      |
| SOCVUB   | 0.16 |      |
| JOHCEP   | 0.51 |      |
| SISKOU   | 1.27 | 1.15 |
| SONMUE   | 0.26 |      |
| VUPJOF   | 1.26 |      |
| VUPJUL   | 1.27 | 1.26 |
| CELVEU   | 0.45 |      |

|          |       |
|----------|-------|
| PTHPFE10 | 0.68  |
| DEDWUE   | 0.65  |
| BUYKUB10 | 0.62  |
| KAJBIH   | -0.15 |
| COCJIN10 | 0.51  |
| PIMTAG   | 0.52  |
| YOHMOX   | 0.48  |
| YEQPOA   | 0.23  |
| CANDAW10 | 0.23  |
| PTSQFE10 | 0.67  |
| VOFLOR   | 0.27  |
| RABHAD   | 0.67  |
| JIGNUI   | 0.54  |

|Quadrupole splitting|, mm/s

|          |      |      |
|----------|------|------|
| VOCBAQ   | 0.58 |      |
| FATBOR   | 3.24 | 0.19 |
| YUZKAF10 | 3.69 | 3.04 |
| YOCKAC   | 1.81 |      |
| XIGDIA   | 3.25 |      |
| ZOCPEM   | 1.48 |      |
| SOCWAI   | 3.17 |      |
| VUNMIA   | 3.38 |      |
| CACZIP10 | 1.67 |      |
| WEDXAF   | 0.37 |      |
| GIDKIN02 | 0.97 |      |
| SOCVUB   | 1.83 |      |
| JOHCEP   | 0.25 |      |
| SISKOU   | 3.58 | 4.28 |
| SONMUE   | 0.58 |      |
| VUPJOF   | 3.58 |      |
| VUPJUL   | 3.79 | 3.61 |
| CELVEU   | 0.85 |      |
| PTHPFE10 | 3.31 |      |
| DEDWUE   | 2.98 |      |
| BUYKUB10 | 2.78 |      |
| KAJBIH   | 3.71 |      |
| COCJIN10 | 0.25 |      |
| PIMTAG   | 0.21 |      |
| YOHMOX   | 1.41 |      |
| YEQPOA   | 1.78 |      |
| CANDAW10 | 0.43 |      |
| PTSQFE10 | 2.92 |      |
| VOFLOR   | 2.44 |      |
| RABHAD   | 1.51 |      |
| JIGNUI   | 1.56 |      |

BPW91/Partridge-1

Isomer shift, mm/s

|                              |      |      |
|------------------------------|------|------|
| +2, MUE = 0.0349 (17 points) |      |      |
| FATBOR                       | 1.00 | 0.09 |
| YUZKAF10                     | 1.37 | 1.08 |
| XIGDIA                       | 1.09 |      |
| VUNMIA                       | 1.09 |      |
| JOHCEP                       | 0.53 |      |
| SISKOU                       | 1.29 | 1.18 |
| VUPJOF                       | 1.27 |      |
| VUPJUL                       | 1.28 | 1.28 |
| PTHPFE10                     | 0.75 |      |
| DEDWUE                       | 0.63 |      |
| BUYKUB10                     | 0.53 |      |
| YEQPOA                       | 0.28 |      |
| PTSQFE10                     | 0.72 |      |

latex bold font

+3, +4, MUE = 0.0253 (18 points)

|          |       |
|----------|-------|
| VOCBAQ   | 0.56  |
| YOCKAC   | 0.47  |
| ZOCPEM   | 0.48  |
| SOCWAI   | 0.11  |
| CACZIP10 | 0.52  |
| WEDXAF   | 0.25  |
| GIDKIN02 | 0.08  |
| SOCVUB   | 0.18  |
| SONMUE   | 0.22  |
| CELVEU   | 0.42  |
| KAJBIH   | -0.05 |
| COCJIN10 | 0.49  |
| PIMTAG   | 0.49  |
| YOHMOX   | 0.45  |
| CANDAW10 | 0.26  |
| VOFLOR   | 0.26  |
| RABHAD   | 0.57  |
| JIGNUI   | 0.52  |

all, MUE = 0.0733 (35 points)

|          |       |       |
|----------|-------|-------|
| VOCBAQ   | 0.69  |       |
| FATBOR   | 0.94  | -0.03 |
| YUZKAF10 | 1.34  | 1.02  |
| YOCKAC   | 0.58  |       |
| XIGDIA   | 1.04  |       |
| ZOCPEM   | 0.58  |       |
| SOCWAI   | 0.09  |       |
| VUNMIA   | 1.04  |       |
| CACZIP10 | 0.63  |       |
| WEDXAF   | 0.28  |       |
| GIDKIN02 | 0.05  |       |
| SOCVUB   | 0.19  |       |
| JOHCEP   | 0.43  |       |
| SISKOU   | 1.26  | 1.13  |
| SONMUE   | 0.24  |       |
| VUPJOF   | 1.23  |       |
| VUPJUL   | 1.25  | 1.25  |
| CELVEU   | 0.51  |       |
| PTHPFE10 | 0.68  |       |
| DEDWUE   | 0.54  |       |
| BUYKUB10 | 0.44  |       |
| KAJBIH   | -0.12 |       |
| COCJIN10 | 0.59  |       |
| PIMTAG   | 0.60  |       |
| YOHMOX   | 0.55  |       |
| YEQPOA   | 0.16  |       |
| CANDAW10 | 0.29  |       |
| PTSQFE10 | 0.64  |       |
| VOFLOR   | 0.29  |       |
| RABHAD   | 0.71  |       |
| JIGNUI   | 0.63  |       |

|Quadrupole splittings|, mm/s

-----

|          |      |      |
|----------|------|------|
| VOCBAQ   | 0.49 |      |
| FATBOR   | 2.58 | 0.29 |
| YUZKAF10 | 3.32 | 2.87 |
| YOCKAC   | 1.77 |      |
| XIGDIA   | 2.87 |      |
| ZOCPEM   | 1.54 |      |
| SOCWAI   | 2.73 |      |
| VUNMIA   | 2.85 |      |
| CACZIP10 | 1.58 |      |
| WEDXAF   | 0.28 |      |



|          |      |      |
|----------|------|------|
| GIDKIN02 | 0.65 |      |
| SOCVUB   | 1.38 |      |
| JOHCEP   | 0.24 |      |
| SISKOU   | 3.33 | 3.93 |
| SONMUE   | 0.19 |      |
| VUPJOF   | 2.90 |      |
| VUPJUL   | 3.08 | 3.04 |
| CELVEU   | 0.98 |      |
| PTHPF10  | 2.76 |      |
| DEDWUE   | 1.85 |      |
| BUYKUB10 | 1.18 |      |
| KAJBIH   | 3.44 |      |
| COCJIN10 | 0.29 |      |
| PIMTAG   | 0.16 |      |
| YOHMOX   | 1.45 |      |
| YEQPOA   | 1.95 |      |
| CANDAW10 | 0.43 |      |
| PTSQFE10 | 2.46 |      |
| VOFLOR   | 2.34 |      |
| RABHAD   | 1.27 |      |
| JIGNUI   | 1.49 |      |

### M06/Partridge-1

Isomer shift, mm/s

```
-----
+2, MUE = 0.0524 (17 points)
FATBOR      0.93  0.1
YUZKAF10    1.52  1.23
XIGDIA      1.08
VUNMIA      1.08
JOHCEP      0.58
SISKOU      1.23  1.12
VUPJOF      1.22
VUPJUL      1.23  1.23
PTHPF10     0.67
DEDWUE      0.66
BUYKUB10    0.63
YEQPOA      0.30
PTSQFE10    0.65

+3, +4, MUE = 0.0344 (18 points)
VOCBAQ      0.53
YOCKAC      0.47
ZOCPEM      0.44
SOCWAI      0.14
CACZIP10    0.50
WEDXAF      0.24
GIDKIN02    0.14
SOCVUB      0.21
SONMUE      0.26
CELVEU      0.41
KAJBIH     -0.11
COCJIN10    0.46
PIMTAG      0.48
YOHMOX      0.44
CANDAW10    0.19
VOFLOR      0.34
RABHAD      0.65
JIGNUI      0.50

all, MUE = 0.0450 (35 points)
VOCBAQ      0.52
FATBOR      0.93  0.11
```

|          |       |      |
|----------|-------|------|
| YUZKAF10 | 1.52  | 1.23 |
| YOCKAC   | 0.46  |      |
| XIGDIA   | 1.08  |      |
| ZOCPEM   | 0.43  |      |
| SOCWAI   | 0.15  |      |
| VUNMIA   | 1.08  |      |
| CACZIP10 | 0.49  |      |
| WEDXAF   | 0.24  |      |
| GIDKIN02 | 0.15  |      |
| SOCVUB   | 0.21  |      |
| JOHCEP   | 0.58  |      |
| SISKOU   | 1.23  | 1.13 |
| SONMUE   | 0.26  |      |
| VUPJOF   | 1.23  |      |
| VUPJUL   | 1.24  | 1.23 |
| CELVEU   | 0.40  |      |
| PTHPFE10 | 0.67  |      |
| DEDWUE   | 0.67  |      |
| BUYKUB10 | 0.64  |      |
| KAJBIH   | -0.09 |      |
| COCJIN10 | 0.45  |      |
| PIMTAG   | 0.47  |      |
| YOHMOX   | 0.43  |      |
| YEQPOA   | 0.31  |      |
| CANDAW10 | 0.19  |      |
| PTSQFE10 | 0.66  |      |
| VOFLOR   | 0.33  |      |
| RABHAD   | 0.63  |      |
| JIGNUI   | 0.49  |      |

|Quadrupole splitting|, mm/s

|          |      |      |
|----------|------|------|
| VOCBAQ   | 0.56 |      |
| FATBOR   | 2.97 | 0.18 |
| YUZKAF10 | 3.46 | 2.87 |
| YUZKAF10 | 3.46 | 2.86 |
| YOCKAC   | 1.81 |      |
| XIGDIA   | 3.08 |      |
| ZOCPEM   | 1.52 |      |
| SOCWAI   | 3.23 |      |
| VUNMIA   | 3.18 |      |
| CACZIP10 | 1.71 |      |
| WEDXAF   | 0.41 |      |
| GIDKIN02 | 1.17 |      |
| SOCVUB   | 1.98 |      |
| JOHCEP   | 0.24 |      |
| SISKOU   | 3.34 | 4.03 |
| SONMUE   | 0.72 |      |
| VUPJOF   | 3.33 |      |
| VUPJUL   | 3.53 | 3.36 |
| CELVEU   | 0.85 |      |
| PTHPFE10 | 3.17 |      |
| DEDWUE   | 2.93 |      |
| BUYKUB10 | 2.74 |      |
| KAJBIH   | 3.23 |      |
| COCJIN10 | 0.26 |      |
| PIMTAG   | 0.21 |      |
| YOHMOX   | 1.40 |      |
| YEQPOA   | 1.66 |      |
| CANDAW10 | 0.42 |      |
| PTSQFE10 | 2.69 |      |
| VOFLOR   | 2.92 |      |
| RABHAD   | 1.51 |      |
| JIGNUI   | 1.60 |      |

M06-2X/Partridge-1

Isomer shift, mm/s

-----  
+2, MUE = 0.0581 (17 points)

|          |      |      |
|----------|------|------|
| FATBOR   | 1.01 | 0.06 |
| YUZKAF10 | 1.29 | 1.03 |
| XIGDIA   | 1.40 |      |
| VUNMIA   | 1.12 |      |
| JOHCEP   | 0.58 |      |
| SISKOU   | 1.23 | 1.13 |
| VUPJOF   | 1.21 |      |
| VUPJUL   | 1.22 | 1.22 |
| PTHPFE10 | 0.73 |      |
| DEDWUE   | 0.65 |      |
| BUYKUB10 | 0.61 |      |
| YEQPOA   | 0.26 |      |
| PTSQFE10 | 0.72 |      |

+3, +4, MUE = 0.0345 (18 points)

|          |       |  |
|----------|-------|--|
| VOCBAQ   | 0.48  |  |
| YOCKAC   | 0.48  |  |
| ZOCPEM   | 0.45  |  |
| SOCWAI   | 0.09  |  |
| CACZIP10 | 0.51  |  |
| WEDXAF   | 0.23  |  |
| GIDKIN02 | 0.24  |  |
| SOCVUB   | 0.14  |  |
| SONMUE   | 0.25  |  |
| CELVEU   | 0.40  |  |
| KAJBIH   | -0.05 |  |
| COCJIN10 | 0.50  |  |
| PIMTAG   | 0.51  |  |
| YOHMOX   | 0.44  |  |
| CANDAW10 | 0.17  |  |
| VOFLOR   | 0.29  |  |
| RABHAD   | 0.65  |  |
| JIGNUI   | 0.51  |  |

all, MUE = 0.0564 (35 points)

|          |       |      |
|----------|-------|------|
| VOCBAQ   | 0.45  |      |
| FATBOR   | 1.02  | 0.12 |
| YUZKAF10 | 1.29  | 1.04 |
| YOCKAC   | 0.44  |      |
| XIGDIA   | 1.39  |      |
| ZOCPEM   | 0.42  |      |
| SOCWAI   | 0.11  |      |
| VUNMIA   | 1.13  |      |
| CACZIP10 | 0.47  |      |
| WEDXAF   | 0.23  |      |
| GIDKIN02 | 0.24  |      |
| SOCVUB   | 0.16  |      |
| JOHCEP   | 0.61  |      |
| SISKOU   | 1.23  | 1.14 |
| SONMUE   | 0.25  |      |
| VUPJOF   | 1.22  |      |
| VUPJUL   | 1.22  | 1.22 |
| CELVEU   | 0.37  |      |
| PTHPFE10 | 0.75  |      |
| DEDWUE   | 0.68  |      |
| BUYKUB10 | 0.65  |      |
| KAJBIH   | -0.01 |      |
| COCJIN10 | 0.46  |      |
| PIMTAG   | 0.47  |      |
| YOHMOX   | 0.41  |      |

|          |      |
|----------|------|
| YEQPOA   | 0.31 |
| CANDAW10 | 0.18 |
| PTSQFE10 | 0.75 |
| VOFLOR   | 0.28 |
| RABHAD   | 0.59 |
| JIGNUI   | 0.47 |

|Quadrupole splitting|, mm/s

```
-----
```

|          |      |      |
|----------|------|------|
| VOCBAQ   | 0.60 |      |
| FATBOR   | 3.55 | 0.09 |
| YUZKAF10 | 3.78 | 2.99 |
| YOCKAC   | 1.97 |      |
| XIGDIA   | 3.19 |      |
| ZOCPEM   | 1.57 |      |
| SOCWAI   | 3.86 |      |
| VUNMIA   | 3.54 |      |
| CACZIP10 | 1.77 |      |
| WEDXAF   | 0.62 |      |
| GIDKIN02 | 1.96 |      |
| SOCVUB   | 2.80 |      |
| JOHCEP   | 0.35 |      |
| SISKOU   | 3.61 | 4.22 |
| SONMUE   | 1.07 |      |
| VUPJOF   | 3.56 |      |
| VUPJUL   | 3.80 | 3.61 |
| CELVEU   | 0.83 |      |
| PTHPFE10 | 3.64 |      |
| DEDWUE   | 3.79 |      |
| BUYKUB10 | 3.58 |      |
| KAJBIH   | 1.81 |      |
| COCJIN10 | 0.29 |      |
| PIMTAG   | 0.24 |      |
| YOHMOX   | 1.29 |      |
| YEQPOA   | 1.67 |      |
| CANDAW10 | 0.38 |      |
| PTSQFE10 | 3.20 |      |
| VOFLOR   | 2.53 |      |
| RABHAD   | 1.54 |      |
| JIGNUI   | 1.67 |      |

OLYP/Partridge-1

Isomer shift, mm/s

```
-----
```

+2, MUE = 0.0372 (17 points)

|          |      |      |
|----------|------|------|
| FATBOR   | 0.99 | 0.06 |
| YUZKAF10 | 1.36 | 1.08 |
| XIGDIA   | 1.09 |      |
| VUNMIA   | 1.09 |      |
| JOHCEP   | 0.50 |      |
| SISKOU   | 1.29 | 1.17 |
| VUPJOF   | 1.27 |      |
| VUPJUL   | 1.28 | 1.27 |
| PTHPFE10 | 0.75 |      |
| DEDWUE   | 0.70 |      |
| BUYKUB10 | 0.56 |      |
| YEQPOA   | 0.26 |      |
| PTSQFE10 | 0.73 |      |

+3, +4, MUE = 0.0269 (18 points)

|        |      |
|--------|------|
| VOCBAQ | 0.56 |
| YOCKAC | 0.48 |
| ZOCPEM | 0.47 |

|          |       |
|----------|-------|
| SOCWAI   | 0.10  |
| CACZIP10 | 0.51  |
| WEDXAF   | 0.26  |
| GIDKIN02 | 0.08  |
| SOCVUB   | 0.17  |
| SONMUE   | 0.23  |
| CELVEU   | 0.43  |
| KAJBIH   | -0.04 |
| COCJIN10 | 0.49  |
| PIMTAG   | 0.50  |
| YOHMOX   | 0.46  |
| CANDAW10 | 0.27  |
| VOFLOR   | 0.26  |
| RABHAD   | 0.57  |
| JIGNUI   | 0.51  |

all, MUE = 0.0703 (35 points)

|          |       |       |
|----------|-------|-------|
| VOCBAQ   | 0.69  |       |
| FATBOR   | 0.94  | -0.06 |
| YUZKAF10 | 1.33  | 1.03  |
| YOCKAC   | 0.58  |       |
| XIGDIA   | 1.05  |       |
| ZOCPPEM  | 0.57  |       |
| SOCWAI   | 0.08  |       |
| VUNMIA   | 1.04  |       |
| CACZIP10 | 0.62  |       |
| WEDXAF   | 0.28  |       |
| GIDKIN02 | 0.05  |       |
| SOCVUB   | 0.16  |       |
| JOHCEP   | 0.41  |       |
| SISKOU   | 1.25  | 1.13  |
| SONMUE   | 0.25  |       |
| VUPJOF   | 1.23  |       |
| VUPJUL   | 1.25  | 1.24  |
| CELVEU   | 0.51  |       |
| PTHPFE10 | 0.68  |       |
| DEDWUE   | 0.63  |       |
| BUYKUB10 | 0.48  |       |
| KAJBIH   | -0.11 |       |
| COCJIN10 | 0.59  |       |
| PIMTAG   | 0.60  |       |
| YOHMOX   | 0.55  |       |
| YEQPOA   | 0.15  |       |
| CANDAW10 | 0.30  |       |
| PTSQFE10 | 0.65  |       |
| VOFLOR   | 0.28  |       |
| RABHAD   | 0.70  |       |
| JIGNUI   | 0.62  |       |

|Quadrupole splitting|, mm/s

|          |      |      |
|----------|------|------|
| VOCBAQ   | 0.50 |      |
| FATBOR   | 2.53 | 0.29 |
| YUZKAF10 | 3.32 | 2.83 |
| YOCKAC   | 1.74 |      |
| XIGDIA   | 2.88 |      |
| ZOCPPEM  | 1.43 |      |
| SOCWAI   | 2.78 |      |
| VUNMIA   | 2.82 |      |
| CACZIP10 | 1.52 |      |
| WEDXAF   | 0.26 |      |
| GIDKIN02 | 0.64 |      |
| SOCVUB   | 1.44 |      |
| JOHCEP   | 0.23 |      |
| SISKOU   | 3.32 | 3.89 |

|          |      |      |
|----------|------|------|
| SONMUE   | 0.28 |      |
| VUPJOF   | 2.55 |      |
| VUPJUL   | 2.65 | 2.64 |
| CELVEU   | 0.96 |      |
| PTHPFE10 | 2.82 |      |
| DEDWUE   | 2.00 |      |
| BUYKUB10 | 1.27 |      |
| KAJBIH   | 3.42 |      |
| COCJIN10 | 0.23 |      |
| PIMTAG   | 0.16 |      |
| YOHMOX   | 1.47 |      |
| YEQPOA   | 1.95 |      |
| CANDAW10 | 0.40 |      |
| PTSQFE10 | 2.45 |      |
| VOFLOR   | 2.37 |      |
| RABHAD   | 1.32 |      |
| JIGNUI   | 1.42 |      |

O3LYP/Partridge-1

Isomer shift, mm/s

-----  
+2, MUE = 0.0285 (17 points)  
FATBOR 0.99 0.05  
YUZKAF10 1.35 1.07  
XIGDIA 1.12  
VUNMIA 1.11  
JOHCEP 0.50  
SISKOU 1.28 1.17  
VUPJOF 1.27  
VUPJUL 1.28 1.28  
PTHPFE10 0.73  
DEDWUE 0.67  
BUYKUB10 0.64  
YEQPOA 0.25  
PTSQFE10 0.71

+3, +4, MUE = 0.0227 (18 points)  
VOCBAQ 0.56  
YOCKAC 0.48  
ZOCPEM 0.46  
SOCWAI 0.10  
CACZIP10 0.50  
WEDXAF 0.26  
GIDKIN02 0.11  
SOCVUB 0.16  
SONMUE 0.25  
CELVEU 0.43  
KAJBIH -0.07  
COCJIN10 0.48  
PIMTAG 0.49  
YOHMOX 0.46  
CANDAW10 0.25  
VOFLOR 0.26  
RABHAD 0.59  
JIGNUI 0.50

all, MUE = 0.0420 (35 points)  
VOCBAQ 0.63  
FATBOR 0.96 -0.02  
YUZKAF10 1.34 1.05  
YOCKAC 0.54  
XIGDIA 1.10  
ZOCPEM 0.51

|          |       |      |
|----------|-------|------|
| SOCWAI   | 0.08  |      |
| VUNMIA   | 1.08  |      |
| CACZIP10 | 0.56  |      |
| WEDXAF   | 0.27  |      |
| GIDKIN02 | 0.09  |      |
| SOCVUB   | 0.15  |      |
| JOHCEP   | 0.45  |      |
| SISKOU   | 1.26  | 1.15 |
| SONMUE   | 0.26  |      |
| VUPJOF   | 1.25  |      |
| VUPJUL   | 1.26  | 1.26 |
| CELVEU   | 0.48  |      |
| PTHPFE10 | 0.69  |      |
| DEDWUE   | 0.63  |      |
| BUYKUB10 | 0.60  |      |
| KAJBIH   | -0.12 |      |
| COCJIN10 | 0.54  |      |
| PIMTAG   | 0.55  |      |
| YOHMOX   | 0.51  |      |
| YEQPOA   | 0.19  |      |
| CANDAW10 | 0.26  |      |
| PTSQFE10 | 0.67  |      |
| VOFLOR   | 0.27  |      |
| RABHAD   | 0.67  |      |
| JIGNUI   | 0.57  |      |

|Quadrupole splitting|, mm/s

-----

|          |      |      |
|----------|------|------|
| VOCBAQ   | 0.54 |      |
| FATBOR   | 3.01 | 0.22 |
| YUZKAF10 | 3.56 | 2.94 |
| YOCKAC   | 1.77 |      |
| XIGDIA   | 3.14 |      |
| ZOCPEM   | 1.44 |      |
| SOCWAI   | 3.04 |      |
| VUNMIA   | 3.16 |      |
| CACZIP10 | 1.60 |      |
| WEDXAF   | 0.32 |      |
| GIDKIN02 | 0.87 |      |
| SOCVUB   | 1.69 |      |
| JOHCEP   | 0.22 |      |
| SISKOU   | 3.47 | 4.14 |
| SONMUE   | 0.52 |      |
| VUPJOF   | 3.49 |      |
| VUPJUL   | 3.69 | 3.52 |
| CELVEU   | 0.89 |      |
| PTHPFE10 | 3.14 |      |
| DEDWUE   | 2.59 |      |
| BUYKUB10 | 2.42 |      |
| KAJBIH   | 3.58 |      |
| COCJIN10 | 0.24 |      |
| PIMTAG   | 0.20 |      |
| YOHMOX   | 1.43 |      |
| YEQPOA   | 1.86 |      |
| CANDAW10 | 0.40 |      |
| PTSQFE10 | 2.74 |      |
| VOFLOR   | 2.46 |      |
| RABHAD   | 1.46 |      |
| JIGNUI   | 1.50 |      |

PBE/Partridge-1

Isomer shift, mm/s

-----

+2, MUE = 0.0350 (17 points)

|          |      |      |
|----------|------|------|
| FATBOR   | 1.00 | 0.09 |
| YUZKAF10 | 1.37 | 1.08 |
| XIGDIA   | 1.09 |      |
| VUNMIA   | 1.09 |      |
| JOHCEP   | 0.52 |      |
| SISKOU   | 1.29 | 1.18 |
| VUPJOF   | 1.27 |      |
| VUPJUL   | 1.28 | 1.28 |
| PTHPFE10 | 0.75 |      |
| DEDWUE   | 0.64 |      |
| BUYKUB10 | 0.53 |      |
| YEQPOA   | 0.27 |      |
| PTSQFE10 | 0.72 |      |

+3, +4, MUE = 0.0253 (18 points)

|          |       |  |
|----------|-------|--|
| VOCBAQ   | 0.56  |  |
| YOCKAC   | 0.47  |  |
| ZOCPEM   | 0.48  |  |
| SOCWAI   | 0.11  |  |
| CACZIP10 | 0.52  |  |
| WEDXAF   | 0.25  |  |
| GIDKIN02 | 0.08  |  |
| SOCVUB   | 0.18  |  |
| SONMUE   | 0.22  |  |
| CELVEU   | 0.42  |  |
| KAJBIH   | -0.05 |  |
| COCJIN10 | 0.49  |  |
| PIMTAG   | 0.50  |  |
| YOHMOX   | 0.45  |  |
| CANDAW10 | 0.26  |  |
| VOFLOR   | 0.26  |  |
| RABHAD   | 0.57  |  |
| JIGNUI   | 0.52  |  |

all, MUE = 0.0746 (35 points)

|          |       |       |
|----------|-------|-------|
| VOCBAQ   | 0.69  |       |
| FATBOR   | 0.94  | -0.04 |
| YUZKAF10 | 1.34  | 1.02  |
| YOCKAC   | 0.58  |       |
| XIGDIA   | 1.04  |       |
| ZOCPEM   | 0.59  |       |
| SOCWAI   | 0.09  |       |
| VUNMIA   | 1.04  |       |
| CACZIP10 | 0.64  |       |
| WEDXAF   | 0.28  |       |
| GIDKIN02 | 0.05  |       |
| SOCVUB   | 0.18  |       |
| JOHCEP   | 0.43  |       |
| SISKOU   | 1.26  | 1.13  |
| SONMUE   | 0.24  |       |
| VUPJOF   | 1.23  |       |
| VUPJUL   | 1.25  | 1.24  |
| CELVEU   | 0.51  |       |
| PTHPFE10 | 0.68  |       |
| DEDWUE   | 0.55  |       |
| BUYKUB10 | 0.43  |       |
| KAJBIH   | -0.12 |       |
| COCJIN10 | 0.60  |       |
| PIMTAG   | 0.61  |       |
| YOHMOX   | 0.55  |       |
| YEQPOA   | 0.16  |       |
| CANDAW10 | 0.29  |       |
| PTSQFE10 | 0.64  |       |
| VOFLOR   | 0.29  |       |
| RABHAD   | 0.71  |       |



JIGNUI 0.63

|Quadrupole splitting|, mm/s

-----  
VOCBAQ 0.49  
FATBOR 2.53 0.3  
YUZKAF10 3.29 2.84  
YOCKAC 1.77  
XIGDIA 2.85  
ZOCPEM 1.52  
SOCWAI 2.73  
VUNMIA 2.82  
CACZIP10 1.57  
WEDXAF 0.28  
GIDKIN02 0.66  
SOCVUB 1.38  
JOHCEP 0.25  
SISKOU 3.31 3.91  
SONMUE 0.19  
VUPJOF 2.66  
VUPJUL 2.77 2.76  
CELVEU 0.98  
PTHPFE10 2.74  
DEDWUE 1.86  
BUYKUB10 1.19  
KAJBIH 3.43  
COCJIN10 0.29  
PIMTAG 0.16  
YOHMOX 1.45  
YEQPOA 1.95  
CANDAW10 0.43  
PTSQFE10 2.42  
VOFLOR 2.34  
RABHAD 1.27  
JIGNUI 1.47

SVWN5/Partridge-1

Isomer shift, mm/s

-----  
+2, MUE = 0.0383 (17 points)

FATBOR 1.00 0.10  
YUZKAF10 1.38 1.09  
XIGDIA 1.07  
VUNMIA 1.09  
JOHCEP 0.53  
SISKOU 1.30 1.18  
VUPJOF 1.27  
VUPJUL 1.28 1.26  
PTHPFE10 0.77  
DEDWUE 0.61  
BUYKUB10 0.52  
YEQPOA 0.28  
PTSQFE10 0.72

+3, +4, MUE = 0.0274 (18 points)

VOCBAQ 0.56  
YOCKAC 0.47  
ZOCPEM 0.47  
SOCWAI 0.12  
CACZIP10 0.51  
WEDXAF 0.26  
GIDKIN02 0.08  
SOCVUB 0.20

|          |       |
|----------|-------|
| SONMUE   | 0.22  |
| CELVEU   | 0.43  |
| KAJBIH   | -0.06 |
| COCJIN10 | 0.49  |
| PIMTAG   | 0.50  |
| YOHMOX   | 0.45  |
| CANDAW10 | 0.27  |
| VOFLOR   | 0.25  |
| RABHAD   | 0.57  |
| JIGNUI   | 0.51  |

all, MUE = 0.0822 (35 points)

|          |       |       |
|----------|-------|-------|
| VOCBAQ   | 0.70  |       |
| FATBOR   | 0.94  | -0.04 |
| YUZKAF10 | 1.35  | 1.03  |
| YOCKAC   | 0.58  |       |
| XIGDIA   | 1.01  |       |
| ZOCPEM   | 0.59  |       |
| SOCWAI   | 0.10  |       |
| VUNMIA   | 1.03  |       |
| CACZIP10 | 0.64  |       |
| WEDXAF   | 0.29  |       |
| GIDKIN02 | 0.05  |       |
| SOCVUB   | 0.21  |       |
| JOHCEP   | 0.42  |       |
| SISKOU   | 1.26  | 1.14  |
| SONMUE   | 0.24  |       |
| VUPJOF   | 1.23  |       |
| VUPJUL   | 1.24  | 1.22  |
| CELVEU   | 0.52  |       |
| PTHPFE10 | 0.69  |       |
| DEDWUE   | 0.51  |       |
| BUYKUB10 | 0.41  |       |
| KAJBIH   | -0.14 |       |
| COCJIN10 | 0.61  |       |
| PIMTAG   | 0.62  |       |
| YOHMOX   | 0.55  |       |
| YEQPOA   | 0.15  |       |
| CANDAW10 | 0.30  |       |
| PTSQFE10 | 0.64  |       |
| VOFLOR   | 0.28  |       |
| RABHAD   | 0.71  |       |
| JIGNUI   | 0.64  |       |

|Quadrupole splitting|, mm/s

-----

|          |      |      |
|----------|------|------|
| VOCBAQ   | 0.48 |      |
| FATBOR   | 2.42 | 0.33 |
| YUZKAF10 | 3.20 | 2.85 |
| YOCKAC   | 1.80 |      |
| XIGDIA   | 2.80 |      |
| ZOCPEM   | 1.56 |      |
| SOCWAI   | 2.66 |      |
| VUNMIA   | 2.71 |      |
| CACZIP10 | 1.58 |      |
| WEDXAF   | 0.24 |      |
| GIDKIN02 | 0.65 |      |
| SOCVUB   | 1.31 |      |
| JOHCEP   | 0.27 |      |
| SISKOU   | 3.26 | 3.82 |
| SONMUE   | 0.12 |      |
| VUPJOF   | 1.42 |      |
| VUPJUL   | 1.55 | 1.49 |
| CELVEU   | 1.03 |      |
| PTHPFE10 | 2.64 |      |
| DEDWUE   | 2.23 |      |

|          |      |
|----------|------|
| BUYKUB10 | 1.25 |
| KAJBIH   | 3.44 |
| COCJIN10 | 0.56 |
| PIMTAG   | 0.30 |
| YOHMOX   | 1.37 |
| YEQPOA   | 1.97 |
| CANDAW10 | 0.45 |
| PTSQFE10 | 2.34 |
| VOFLOR   | 2.37 |
| RABHAD   | 1.22 |
| JIGNUI   | 1.49 |

B3LYP/Wachters

Isomer shift, mm/s

-----  
+2, MUE = 0.0283 (17 points)

|          |      |      |
|----------|------|------|
| FATBOR   | 0.97 | 0.06 |
| YUZKAF10 | 1.36 | 1.08 |
| XIGDIA   | 1.11 |      |
| VUNMIA   | 1.12 |      |
| JOHCEP   | 0.52 |      |
| SISKOU   | 1.28 | 1.17 |
| VUPJOF   | 1.27 |      |
| VUPJUL   | 1.28 | 1.27 |
| PTHPE10  | 0.71 |      |
| DEWUE    | 0.67 |      |
| BUYKUB10 | 0.64 |      |
| YEQPOA   | 0.25 |      |
| PTSQFE10 | 0.7  |      |

+3, +4, MUE = 0.0285 (18 points)

|          |       |
|----------|-------|
| VOCBAQ   | 0.56  |
| YOCKAC   | 0.47  |
| ZOCPEM   | 0.45  |
| SOCWAI   | 0.11  |
| CACZIP10 | 0.50  |
| WEDXAF   | 0.27  |
| GIDKIN02 | 0.16  |
| SOCVUB   | 0.16  |
| SONMUE   | 0.28  |
| CELVEU   | 0.44  |
| KAJBIH   | -0.10 |
| COCJIN10 | 0.48  |
| PIMTAG   | 0.48  |
| YOHMOX   | 0.44  |
| CANDAW10 | 0.24  |
| VOFLOR   | 0.26  |
| RABHAD   | 0.61  |
| JIGNUI   | 0.50  |

all, MUE = 0.0324 (35 points)

|          |      |      |
|----------|------|------|
| VOCBAQ   | 0.62 |      |
| FATBOR   | 0.96 | 0.03 |
| YUZKAF10 | 1.35 | 1.06 |
| YOCKAC   | 0.50 |      |
| XIGDIA   | 1.10 |      |
| ZOCPEM   | 0.48 |      |
| SOCWAI   | 0.08 |      |
| VUNMIA   | 1.11 |      |
| CACZIP10 | 0.54 |      |
| WEDXAF   | 0.27 |      |
| GIDKIN02 | 0.14 |      |
| SOCVUB   | 0.14 |      |

|          |       |      |
|----------|-------|------|
| JOHCEP   | 0.49  |      |
| SISKOU   | 1.27  | 1.16 |
| SONMUE   | 0.29  |      |
| VUPJOF   | 1.25  |      |
| VUPJUL   | 1.26  | 1.26 |
| CELVEU   | 0.48  |      |
| PTHPFE10 | 0.69  |      |
| DEDWUE   | 0.65  |      |
| BUYKUB10 | 0.62  |      |
| KAJBIH   | -0.16 |      |
| COCJIN10 | 0.52  |      |
| PIMTAG   | 0.53  |      |
| YOHMOX   | 0.47  |      |
| YEQPOA   | 0.22  |      |
| CANDAW10 | 0.24  |      |
| PTSQFE10 | 0.68  |      |
| VOFLOR   | 0.26  |      |
| RABHAD   | 0.67  |      |
| JIGNUI   | 0.54  |      |

|Quadrupole splitting|, mm/s

|          |      |      |
|----------|------|------|
| VOCBAQ   | 0.60 |      |
| FATBOR   | 3.10 | 0.17 |
| YUZKAF10 | 3.58 | 3.04 |
| YOCKAC   | 1.70 |      |
| XIGDIA   | 3.19 |      |
| ZOCPEM   | 1.40 |      |
| SOCWAI   | 3.09 |      |
| VUNMIA   | 3.30 |      |
| CACZIP10 | 1.57 |      |
| WEDXAF   | 0.27 |      |
| GIDKIN02 | 0.78 |      |
| SOCVUB   | 1.82 |      |
| JOHCEP   | 0.26 |      |
| SISKOU   | 3.47 | 4.14 |
| SONMUE   | 0.40 |      |
| VUPJOF   | 3.50 |      |
| VUPJUL   | 3.68 | 3.52 |
| CELVEU   | 0.81 |      |
| PTHPFE10 | 3.18 |      |
| DEDWUE   | 3.29 |      |
| BUYKUB10 | 3.09 |      |
| KAJBIH   | 3.62 |      |
| COCJIN10 | 0.23 |      |
| PIMTAG   | 0.19 |      |
| YOHMOX   | 1.33 |      |
| YEQPOA   | 1.68 |      |
| CANDAW10 | 0.43 |      |
| PTSQFE10 | 2.86 |      |
| VOFLOR   | 2.37 |      |
| RABHAD   | 1.40 |      |
| JIGNUI   | 1.47 |      |

### BPW91/Wachters

Isomer shift, mm/s

|                              |      |      |
|------------------------------|------|------|
| +2, MUE = 0.0283 (17 points) |      |      |
| FATBOR                       | 0.99 | 0.08 |
| YUZKAF10                     | 1.37 | 1.09 |
| XIGDIA                       | 1.07 |      |
| VUNMIA                       | 1.09 |      |
| JOHCEP                       | 0.52 |      |
| SISKOU                       | 1.29 | 1.18 |
| VUPJOF                       | 1.27 |      |

|          |      |      |
|----------|------|------|
| VUPJUL   | 1.28 | 1.28 |
| PTHPFE10 | 0.76 |      |
| DEDWUE   | 0.63 |      |
| BUYKUB10 | 0.54 |      |
| YEQPOA   | 0.27 |      |
| PTSQFE10 | 0.73 |      |

+3, +4, MUE = 0.0289 (18 points)

|          |       |  |
|----------|-------|--|
| VOCBAQ   | 0.57  |  |
| YOCKAC   | 0.46  |  |
| ZOCPEM   | 0.47  |  |
| SOCWAI   | 0.10  |  |
| CACZIP10 | 0.51  |  |
| WEDXAF   | 0.27  |  |
| GIDKIN02 | 0.10  |  |
| SOCVUB   | 0.17  |  |
| SONMUE   | 0.25  |  |
| CELVEU   | 0.44  |  |
| KAJBIH   | -0.06 |  |
| COCJIN10 | 0.48  |  |
| PIMTAG   | 0.49  |  |
| YOHMOX   | 0.44  |  |
| CANDAW10 | 0.26  |  |
| VOFLOR   | 0.25  |  |
| RABHAD   | 0.57  |  |
| JIGNUI   | 0.51  |  |

all, MUE = 0.0772 (35 points)

|          |       |       |
|----------|-------|-------|
| VOCBAQ   | 0.71  |       |
| FATBOR   | 0.92  | -0.05 |
| YUZKAF10 | 1.34  | 1.04  |
| YOCKAC   | 0.56  |       |
| XIGDIA   | 1.02  |       |
| ZOCPEM   | 0.58  |       |
| SOCWAI   | 0.08  |       |
| VUNMIA   | 1.04  |       |
| CACZIP10 | 0.63  |       |
| WEDXAF   | 0.30  |       |
| GIDKIN02 | 0.08  |       |
| SOCVUB   | 0.17  |       |
| JOHCEP   | 0.42  |       |
| SISKOU   | 1.26  | 1.14  |
| SONMUE   | 0.28  |       |
| VUPJOF   | 1.23  |       |
| VUPJUL   | 1.24  | 1.24  |
| CELVEU   | 0.54  |       |
| PTHPFE10 | 0.68  |       |
| DEDWUE   | 0.54  |       |
| BUYKUB10 | 0.44  |       |
| KAJBIH   | -0.14 |       |
| COCJIN10 | 0.59  |       |
| PIMTAG   | 0.61  |       |
| YOHMOX   | 0.53  |       |
| YEQPOA   | 0.15  |       |
| CANDAW10 | 0.30  |       |
| PTSQFE10 | 0.65  |       |
| VOFLOR   | 0.28  |       |
| RABHAD   | 0.71  |       |
| JIGNUI   | 0.63  |       |

|Quadrupole splitting|, mm/s

|          |      |      |
|----------|------|------|
| VOCBAQ   | 0.52 |      |
| FATBOR   | 2.49 | 0.27 |
| YUZKAF10 | 3.21 | 2.88 |
| YOCKAC   | 1.65 |      |

|          |      |      |
|----------|------|------|
| XIGDIA   | 2.83 |      |
| ZOCPEM   | 1.47 |      |
| SOCWAI   | 2.67 |      |
| VUNMIA   | 2.78 |      |
| CACZIP10 | 1.50 |      |
| WEDXAF   | 0.21 |      |
| GIDKIN02 | 0.49 |      |
| SOCVUB   | 1.38 |      |
| JOHCEP   | 0.23 |      |
| SISKOU   | 3.22 | 3.8  |
| SONMUE   | 0.07 |      |
| VUPJOF   | 2.78 |      |
| VUPJUL   | 2.93 | 2.92 |
| CELVEU   | 0.95 |      |
| PTHPFE10 | 2.64 |      |
| DEDWUE   | 1.57 |      |
| BUYKUB10 | 0.82 |      |
| KAJBIH   | 3.36 |      |
| COCJIN10 | 0.26 |      |
| PIMTAG   | 0.15 |      |
| YOHMOX   | 1.38 |      |
| YEQPOA   | 1.84 |      |
| CANDAW10 | 0.43 |      |
| PTSQFE10 | 2.38 |      |
| VOFLOR   | 2.27 |      |
| RABHAD   | 1.18 |      |
| JIGNUI   | 1.41 |      |

#### M06/Wachters

Isomer shift, mm/s

-----  
+2, MUE = 0.0334 (17 points)

|          |      |      |
|----------|------|------|
| FATBOR   | 0.94 | 0.04 |
| YUZKAF10 | 1.37 | 1.07 |
| XIGDIA   | 1.12 |      |
| VUNMIA   | 1.11 |      |
| JOHCEP   | 0.59 |      |
| SISKOU   | 1.28 | 1.18 |
| VUPJOF   | 1.27 |      |
| VUPJUL   | 1.28 | 1.28 |
| PTHPFE10 | 0.68 |      |
| DEDWUE   | 0.67 |      |
| BUYKUB10 | 0.64 |      |
| YEQPOA   | 0.28 |      |
| PTSQFE10 | 0.66 |      |

+3, +4, MUE = 0.0352 (18 points)

|          |       |  |
|----------|-------|--|
| VOCBAQ   | 0.54  |  |
| YOCKAC   | 0.46  |  |
| ZOCPEM   | 0.43  |  |
| SOCWAI   | 0.13  |  |
| CACZIP10 | 0.50  |  |
| WEDXAF   | 0.25  |  |
| GIDKIN02 | 0.15  |  |
| SOCVUB   | 0.19  |  |
| SONMUE   | 0.28  |  |
| CELVEU   | 0.43  |  |
| KAJBIH   | -0.10 |  |
| COCJIN10 | 0.47  |  |
| PIMTAG   | 0.48  |  |
| YOHMOX   | 0.42  |  |
| CANDAW10 | 0.19  |  |
| VOFLOR   | 0.35  |  |

|                               |       |      |
|-------------------------------|-------|------|
| RABHAD                        | 0.64  |      |
| JIGNUI                        | 0.50  |      |
| all, MUE = 0.0370 (35 points) |       |      |
| VOCBAQ                        | 0.53  |      |
| FATBOR                        | 0.95  | 0.08 |
| YUZKAF10                      | 1.36  | 1.08 |
| YOCKAC                        | 0.44  |      |
| XIGDIA                        | 1.12  |      |
| ZOCPEM                        | 0.42  |      |
| SOCWAI                        | 0.12  |      |
| VUNMIA                        | 1.11  |      |
| CACZIP10                      | 0.48  |      |
| WEDXAF                        | 0.24  |      |
| GIDKIN02                      | 0.14  |      |
| SOCVUB                        | 0.18  |      |
| JOHCEP                        | 0.61  |      |
| SISKOU                        | 1.28  | 1.18 |
| SONMUE                        | 0.27  |      |
| VUPJOF                        | 1.27  |      |
| VUPJUL                        | 1.28  | 1.28 |
| CELVEU                        | 0.41  |      |
| PTHPFE10                      | 0.70  |      |
| DEDWUE                        | 0.69  |      |
| BUYKUB10                      | 0.66  |      |
| KAJBIH                        | -0.10 |      |
| COCJIN10                      | 0.46  |      |
| PIMTAG                        | 0.47  |      |
| YOHMOX                        | 0.41  |      |
| YEQPOA                        | 0.32  |      |
| CANDAW10                      | 0.18  |      |
| PTSQFE10                      | 0.68  |      |
| VOFLOR                        | 0.34  |      |
| RABHAD                        | 0.63  |      |
| JIGNUI                        | 0.49  |      |

|Quadrupole splitting|, mm/s

|          |      |      |
|----------|------|------|
| VOCBAQ   | 0.57 |      |
| FATBOR   | 2.87 | 0.16 |
| YUZKAF10 | 3.33 | 2.85 |
| YOCKAC   | 1.70 |      |
| XIGDIA   | 2.98 |      |
| ZOCPEM   | 1.43 |      |
| SOCWAI   | 3.13 |      |
| VUNMIA   | 3.07 |      |
| CACZIP10 | 1.60 |      |
| WEDXAF   | 0.29 |      |
| GIDKIN02 | 0.96 |      |
| SOCVUB   | 1.94 |      |
| JOHCEP   | 0.25 |      |
| SISKOU   | 3.22 | 3.88 |
| SONMUE   | 0.52 |      |
| VUPJOF   | 3.22 |      |
| VUPJUL   | 3.41 | 3.25 |
| CELVEU   | 0.82 |      |
| PTHPFE10 | 3.03 |      |
| DEDWUE   | 3.13 |      |
| BUYKUB10 | 2.99 |      |
| KAJBIH   | 3.11 |      |
| COCJIN10 | 0.24 |      |
| PIMTAG   | 0.19 |      |
| YOHMOX   | 1.32 |      |
| YEQPOA   | 1.55 |      |
| CANDAW10 | 0.42 |      |
| PTSQFE10 | 2.56 |      |

|        |      |
|--------|------|
| VOFLOR | 3.21 |
| RABHAD | 1.40 |
| JIGNUI | 1.50 |

M06-2X/Wachters

Isomer shift, mm/s

-----  
+2, MUE = 0.0380 (17 points)

|          |      |      |
|----------|------|------|
| FATBOR   | 1.02 | 0.01 |
| YUZKAF10 | 1.33 | 1.07 |
| XIGDIA   | 1.12 |      |
| VUNMIA   | 1.15 |      |
| JOHCEP   | 0.56 |      |
| SISKOU   | 1.26 | 1.16 |
| VUPJOF   | 1.25 |      |
| VUPJUL   | 1.26 | 1.25 |
| PTHPE10  | 0.74 |      |
| DEWUE    | 0.66 |      |
| BUYKUB10 | 0.63 |      |
| YEQPOA   | 0.23 |      |
| PTSQFE10 | 0.75 |      |

+3, +4, MUE = 0.0342 (18 points)

|          |       |
|----------|-------|
| VOCBAQ   | 0.54  |
| YOCKAC   | 0.46  |
| ZOCPEM   | 0.44  |
| SOCWAI   | 0.09  |
| CACZIP10 | 0.50  |
| WEDXAF   | 0.25  |
| GIDKIN02 | 0.18  |
| SOCVUB   | 0.14  |
| SONMUE   | 0.29  |
| CELVEU   | 0.42  |
| KAJBIH   | -0.04 |
| COCJIN10 | 0.49  |
| PIMTAG   | 0.50  |
| YOHMOX   | 0.43  |
| CANDAW10 | 0.18  |
| VOFLOR   | 0.25  |
| RABHAD   | 0.64  |
| JIGNUI   | 0.50  |

all, MUE = 0.0426 (35 points)

|          |      |      |
|----------|------|------|
| VOCBAQ   | 0.51 |      |
| FATBOR   | 1.03 | 0.09 |
| YUZKAF10 | 1.32 | 1.08 |
| YOCKAC   | 0.44 |      |
| XIGDIA   | 1.13 |      |
| ZOCPEM   | 0.42 |      |
| SOCWAI   | 0.10 |      |
| VUNMIA   | 1.15 |      |
| CACZIP10 | 0.47 |      |
| WEDXAF   | 0.24 |      |
| GIDKIN02 | 0.18 |      |
| SOCVUB   | 0.14 |      |
| JOHCEP   | 0.60 |      |
| SISKOU   | 1.25 | 1.17 |
| SONMUE   | 0.28 |      |
| VUPJOF   | 1.25 |      |
| VUPJUL   | 1.25 | 1.25 |
| CELVEU   | 0.40 |      |
| PTHPE10  | 0.77 |      |
| DEWUE    | 0.69 |      |



|          |       |
|----------|-------|
| BUYKUB10 | 0.66  |
| KAJBIH   | -0.03 |
| COCJIN10 | 0.46  |
| PIMTAG   | 0.47  |
| YOHMOX   | 0.40  |
| YEQPOA   | 0.30  |
| CANDAW10 | 0.18  |
| PTSQFE10 | 0.78  |
| VOFLOR   | 0.24  |
| RABHAD   | 0.60  |
| JIGNUI   | 0.47  |

|Quadrupole splitting|, mm/s

```
-----
```

|          |      |      |
|----------|------|------|
| VOCBAQ   | 0.61 |      |
| FATBOR   | 3.40 | 0.08 |
| YUZKAF10 | 3.65 | 2.98 |
| YOCKAC   | 1.82 |      |
| XIGDIA   | 3.11 |      |
| ZOCPEM   | 1.45 |      |
| SOCWAI   | 3.71 |      |
| VUNMIA   | 3.43 |      |
| CACZIP10 | 1.64 |      |
| WEDXAF   | 0.48 |      |
| GIDKIN02 | 1.34 |      |
| SOCVUB   | 2.71 |      |
| JOHCEP   | 0.35 |      |
| SISKOU   | 3.47 | 4.07 |
| SONMUE   | 0.86 |      |
| VUPJOF   | 3.45 |      |
| VUPJUL   | 3.66 | 3.48 |
| CELVEU   | 0.74 |      |
| PTHPFE10 | 3.48 |      |
| DEDWUE   | 4.13 |      |
| BUYKUB10 | 3.92 |      |
| KAJBIH   | 1.69 |      |
| COCJIN10 | 0.27 |      |
| PIMTAG   | 0.22 |      |
| YOHMOX   | 1.18 |      |
| YEQPOA   | 1.56 |      |
| CANDAW10 | 0.37 |      |
| PTSQFE10 | 3.08 |      |
| VOFLOR   | 2.46 |      |
| RABHAD   | 1.41 |      |
| JIGNUI   | 1.54 |      |

OLYP/Wachters

Isomer shift, mm/s

```
-----
```

+2, MUE = 0.0352 (17 points)

|          |      |      |
|----------|------|------|
| FATBOR   | 0.97 | 0.06 |
| YUZKAF10 | 1.36 | 1.10 |
| XIGDIA   | 1.07 |      |
| VUNMIA   | 1.09 |      |
| JOHCEP   | 0.50 |      |
| SISKOU   | 1.29 | 1.19 |
| VUPJOF   | 1.27 |      |
| VUPJUL   | 1.28 | 1.27 |
| PTHPFE10 | 0.77 |      |
| DEDWUE   | 0.66 |      |
| BUYKUB10 | 0.58 |      |
| YEQPOA   | 0.26 |      |
| PTSQFE10 | 0.74 |      |

+3, +4, MUE = 0.0321 (18 points)

|          |       |
|----------|-------|
| VOCBAQ   | 0.57  |
| YOCKAC   | 0.47  |
| ZOCPEM   | 0.46  |
| SOCWAI   | 0.09  |
| CACZIP10 | 0.50  |
| WEDXAF   | 0.27  |
| GIDKIN02 | 0.10  |
| SOCVUB   | 0.15  |
| SONMUE   | 0.26  |
| CELVEU   | 0.45  |
| KAJBIH   | -0.05 |
| COCJIN10 | 0.49  |
| PIMTAG   | 0.49  |
| YOHMOX   | 0.45  |
| CANDAW10 | 0.27  |
| VOFLOR   | 0.25  |
| RABHAD   | 0.57  |
| JIGNUI   | 0.51  |

all, MUE = 0.0756 (35 points)

|          |       |       |
|----------|-------|-------|
| VOCBAQ   | 0.71  |       |
| FATBOR   | 0.91  | -0.07 |
| YUZKAF10 | 1.34  | 1.05  |
| YOCKAC   | 0.57  |       |
| XIGDIA   | 1.02  |       |
| ZOCPEM   | 0.56  |       |
| SOCWAI   | 0.07  |       |
| VUNMIA   | 1.04  |       |
| CACZIP10 | 0.62  |       |
| WEDXAF   | 0.30  |       |
| GIDKIN02 | 0.08  |       |
| SOCVUB   | 0.15  |       |
| JOHCEP   | 0.41  |       |
| SISKOU   | 1.25  | 1.14  |
| SONMUE   | 0.29  |       |
| VUPJOF   | 1.23  |       |
| VUPJUL   | 1.24  | 1.23  |
| CELVEU   | 0.54  |       |
| PTHPFE10 | 0.69  |       |
| DEDWUE   | 0.57  |       |
| BUYKUB10 | 0.49  |       |
| KAJBIH   | -0.12 |       |
| COCJIN10 | 0.59  |       |
| PIMTAG   | 0.61  |       |
| YOHMOX   | 0.54  |       |
| YEQPOA   | 0.15  |       |
| CANDAW10 | 0.30  |       |
| PTSQFE10 | 0.66  |       |
| VOFLOR   | 0.27  |       |
| RABHAD   | 0.71  |       |
| JIGNUI   | 0.62  |       |

|Quadrupole splitting|, mm/s

-----

|          |      |      |
|----------|------|------|
| VOCBAQ   | 0.53 |      |
| FATBOR   | 2.44 | 0.28 |
| YUZKAF10 | 3.20 | 2.83 |
| YOCKAC   | 1.64 |      |
| XIGDIA   | 2.82 |      |
| ZOCPEM   | 1.37 |      |
| SOCWAI   | 2.73 |      |
| VUNMIA   | 2.74 |      |
| CACZIP10 | 1.45 |      |

|          |      |      |
|----------|------|------|
| WEDXAF   | 0.19 |      |
| GIDKIN02 | 0.49 |      |
| SOCVUB   | 1.44 |      |
| JOHCEP   | 0.23 |      |
| SISKOU   | 3.21 | 3.77 |
| SONMUE   | 0.13 |      |
| VUPJOF   | 2.45 |      |
| VUPJUL   | 2.47 | 2.48 |
| CELVEU   | 0.93 |      |
| PTHPFE10 | 2.71 |      |
| DEDWUE   | 1.87 |      |
| BUYKUB10 | 1.05 |      |
| KAJBIH   | 3.35 |      |
| COCJIN10 | 0.21 |      |
| PIMTAG   | 0.15 |      |
| YOHMOX   | 1.41 |      |
| YEQPOA   | 1.83 |      |
| CANDAW10 | 0.40 |      |
| PTSQFE10 | 2.36 |      |
| VOFLOR   | 2.31 |      |
| RABHAD   | 1.24 |      |
| JIGNUI   | 1.36 |      |

### O3LYP/Wachters

Isomer shift, mm/s

-----  
+2, MUE = 0.0320 (17 points)  
FATBOR 0.97 0.04  
YUZKAF10 1.35 1.09  
XIGDIA 1.10  
VUNMIA 1.10  
JOHCEP 0.50  
SISKOU 1.28 1.17  
VUPJOF 1.27  
VUPJUL 1.28 1.28  
PTHPFE10 0.73  
DEDWUE 0.68  
BUYKUB10 0.64  
YEQPOA 0.25  
PTSQFE10 0.72

+3, +4, MUE = 0.0291 (18 points)  
VOCBAQ 0.57  
YOCKAC 0.47  
ZOCPEM 0.45  
SOCWAI 0.10  
CACZIP10 0.50  
WEDXAF 0.27  
GIDKIN02 0.13  
SOCVUB 0.15  
SONMUE 0.28  
CELVEU 0.45  
KAJBIH -0.07  
COCJIN10 0.48  
PIMTAG 0.49  
YOHMOX 0.44  
CANDAW10 0.25  
VOFLOR 0.25  
RABHAD 0.59  
JIGNUI 0.50

all, MUE = 0.0461 (35 points)  
VOCBAQ 0.65

|          |       |       |
|----------|-------|-------|
| FATBOR   | 0.94  | -0.03 |
| YUZKAF10 | 1.34  | 1.06  |
| YOCKAC   | 0.52  |       |
| XIGDIA   | 1.07  |       |
| ZOCPEM   | 0.51  |       |
| SOCWAI   | 0.07  |       |
| VUNMIA   | 1.08  |       |
| CACZIP10 | 0.56  |       |
| WEDXAF   | 0.29  |       |
| GIDKIN02 | 0.12  |       |
| SOCVUB   | 0.13  |       |
| JOHCEP   | 0.44  |       |
| SISKOU   | 1.26  | 1.15  |
| SONMUE   | 0.29  |       |
| VUPJOF   | 1.25  |       |
| VUPJUL   | 1.26  | 1.26  |
| CELVEU   | 0.50  |       |
| PTHPF10  | 0.69  |       |
| DEDWUE   | 0.63  |       |
| BUYKUB10 | 0.60  |       |
| KAJBIH   | -0.13 |       |
| COCJIN10 | 0.54  |       |
| PIMTAG   | 0.55  |       |
| YOHMOX   | 0.49  |       |
| YEQPOA   | 0.18  |       |
| CANDAW10 | 0.27  |       |
| PTSQFE10 | 0.68  |       |
| VOFLOR   | 0.26  |       |
| RABHAD   | 0.68  |       |
| JIGNUI   | 0.57  |       |

|Quadrupole splitting|, mm/s

-----

|          |      |      |
|----------|------|------|
| VOCBAQ   | 0.57 |      |
| FATBOR   | 2.90 | 0.21 |
| YUZKAF10 | 3.43 | 2.95 |
| YOCKAC   | 1.67 |      |
| XIGDIA   | 3.05 |      |
| ZOCPEM   | 1.37 |      |
| SOCWAI   | 2.98 |      |
| VUNMIA   | 3.07 |      |
| CACZIP10 | 1.52 |      |
| WEDXAF   | 0.23 |      |
| GIDKIN02 | 0.69 |      |
| SOCVUB   | 1.69 |      |
| JOHCEP   | 0.22 |      |
| SISKOU   | 3.36 | 4.01 |
| SONMUE   | 0.34 |      |
| VUPJOF   | 3.42 |      |
| VUPJUL   | 3.58 | 3.43 |
| CELVEU   | 0.86 |      |
| PTHPF10  | 3.01 |      |
| DEDWUE   | 2.84 |      |
| BUYKUB10 | 2.67 |      |
| KAJBIH   | 3.50 |      |
| COCJIN10 | 0.23 |      |
| PIMTAG   | 0.19 |      |
| YOHMOX   | 1.37 |      |
| YEQPOA   | 1.75 |      |
| CANDAW10 | 0.40 |      |
| PTSQFE10 | 2.65 |      |
| VOFLOR   | 2.39 |      |
| RABHAD   | 1.37 |      |
| JIGNUI   | 1.42 |      |

PBE/Wachters

Isomer shift, mm/s

-----  
+2, MUE = 0.0355 (17 points)  
FATBOR 0.99 0.08  
YUZKAF10 1.37 1.09  
XIGDIA 1.07  
VUNMIA 1.09  
JOHCEP 0.52  
SISKOU 1.29 1.18  
VUPJOF 1.27  
VUPJUL 1.28 1.27  
PTHPFE10 0.76  
DEDWUE 0.63  
BUYKUB10 0.54  
YEQPOA 0.27  
PTSQFE10 0.73

+3, +4, MUE = 0.0291 (18 points)  
VOCBAQ 0.57  
YOCKAC 0.46  
ZOCPEM 0.47  
SOCWAI 0.10  
CACZIP10 0.51  
WEDXAF 0.27  
GIDKIN02 0.10  
SOCVUB 0.17  
SONMUE 0.25  
CELVEU 0.44  
KAJBIH -0.06  
COCJIN10 0.49  
PIMTAG 0.49  
YOHMOX 0.44  
CANDAW10 0.26  
VOFLOR 0.25  
RABHAD 0.57  
JIGNUI 0.51

all, MUE = 0.0793 (35 points)  
VOCBAQ 0.71  
FATBOR 0.92 -0.06  
YUZKAF10 1.34 1.04  
YOCKAC 0.57  
XIGDIA 1.02  
ZOCPEM 0.58  
SOCWAI 0.08  
VUNMIA 1.03  
CACZIP10 0.64  
WEDXAF 0.30  
GIDKIN02 0.08  
SOCVUB 0.17  
JOHCEP 0.42  
SISKOU 1.26 1.14  
SONMUE 0.28  
VUPJOF 1.23  
VUPJUL 1.24 1.23  
CELVEU 0.54  
PTHPFE10 0.68  
DEDWUE 0.53  
BUYKUB10 0.44  
KAJBIH -0.13  
COCJIN10 0.60  
PIMTAG 0.61  
YOHMOX 0.54

|          |      |
|----------|------|
| YEQPOA   | 0.15 |
| CANDAW10 | 0.30 |
| PTSQFE10 | 0.65 |
| VOFLOR   | 0.28 |
| RABHAD   | 0.71 |
| JIGNUI   | 0.64 |

|Quadrupole splitting|, mm/s

```
-----
```

|          |      |      |
|----------|------|------|
| VOCBAQ   | 0.52 |      |
| FATBOR   | 2.46 | 0.28 |
| YUZKAF10 | 3.17 | 2.86 |
| YOCKAC   | 1.65 |      |
| XIGDIA   | 2.79 |      |
| ZOCPEM   | 1.45 |      |
| SOCWAI   | 2.67 |      |
| VUNMIA   | 2.74 |      |
| CACZIP10 | 1.49 |      |
| WEDXAF   | 0.21 |      |
| GIDKIN02 | 0.50 |      |
| SOCVUB   | 1.37 |      |
| JOHCEP   | 0.24 |      |
| SISKOU   | 3.19 | 3.77 |
| SONMUE   | 0.07 |      |
| VUPJOF   | 2.59 |      |
| VUPJUL   | 2.58 | 2.6  |
| CELVEU   | 0.95 |      |
| PTHPFE10 | 2.62 |      |
| DEDWUE   | 1.46 |      |
| BUYKUB10 | 0.81 |      |
| KAJBIH   | 3.36 |      |
| COCJIN10 | 0.26 |      |
| PIMTAG   | 0.15 |      |
| YOHMOX   | 1.37 |      |
| YEQPOA   | 1.84 |      |
| CANDAW10 | 0.43 |      |
| PTSQFE10 | 2.34 |      |
| VOFLOR   | 2.27 |      |
| RABHAD   | 1.18 |      |
| JIGNUI   | 1.40 |      |

SVWN5/Wachters

Isomer shift, mm/s

```
-----
```

+2, MUE = 0.0355 (17 points)

|          |      |      |
|----------|------|------|
| FATBOR   | 0.99 | 0.09 |
| YUZKAF10 | 1.38 | 1.1  |
| XIGDIA   | 1.07 |      |
| VUNMIA   | 1.08 |      |
| JOHCEP   | 0.51 |      |
| SISKOU   | 1.29 | 1.19 |
| VUPJOF   | 1.27 |      |
| VUPJUL   | 1.28 | 1.26 |
| PTHPFE10 | 0.78 |      |
| DEDWUE   | 0.63 |      |
| BUYKUB10 | 0.53 |      |
| YEQPOA   | 0.27 |      |
| PTSQFE10 | 0.74 |      |

+3, +4, MUE = 0.0318 (18 points)

|        |      |
|--------|------|
| VOCBAQ | 0.57 |
| YOCKAC | 0.46 |
| ZOCPEM | 0.47 |

|          |       |
|----------|-------|
| SOCWAI   | 0.11  |
| CACZIP10 | 0.51  |
| WEDXAF   | 0.27  |
| GIDKIN02 | 0.10  |
| SOCVUB   | 0.18  |
| SONMUE   | 0.25  |
| CELVEU   | 0.45  |
| KAJBIH   | -0.07 |
| COCJIN10 | 0.49  |
| PIMTAG   | 0.49  |
| YOHMOX   | 0.44  |
| CANDAW10 | 0.27  |
| VOFLOR   | 0.24  |
| RABHAD   | 0.57  |
| JIGNUI   | 0.51  |

all, MUE = 0.0845 (35 points)

|          |       |       |
|----------|-------|-------|
| VOCBAQ   | 0.73  |       |
| FATBOR   | 0.92  | -0.05 |
| YUZKAF10 | 1.34  | 1.04  |
| YOCKAC   | 0.57  |       |
| XIGDIA   | 1.01  |       |
| ZOCPEM   | 0.58  |       |
| SOCWAI   | 0.09  |       |
| VUNMIA   | 1.02  |       |
| CACZIP10 | 0.64  |       |
| WEDXAF   | 0.31  |       |
| GIDKIN02 | 0.08  |       |
| SOCVUB   | 0.20  |       |
| JOHCEP   | 0.40  |       |
| SISKOU   | 1.25  | 1.14  |
| SONMUE   | 0.28  |       |
| VUPJOF   | 1.23  |       |
| VUPJUL   | 1.23  | 1.22  |
| CELVEU   | 0.55  |       |
| PTHPFE10 | 0.69  |       |
| DEDWUE   | 0.53  |       |
| BUYKUB10 | 0.43  |       |
| KAJBIH   | -0.15 |       |
| COCJIN10 | 0.61  |       |
| PIMTAG   | 0.62  |       |
| YOHMOX   | 0.54  |       |
| YEQPOA   | 0.14  |       |
| CANDAW10 | 0.31  |       |
| PTSQFE10 | 0.65  |       |
| VOFLOR   | 0.27  |       |
| RABHAD   | 0.71  |       |
| JIGNUI   | 0.64  |       |

|Quadrupole splitting|, mm/s

-----

|          |      |      |
|----------|------|------|
| VOCBAQ   | 0.51 |      |
| FATBOR   | 2.32 | 0.32 |
| YUZKAF10 | 3.09 | 2.85 |
| YOCKAC   | 1.69 |      |
| XIGDIA   | 2.72 |      |
| ZOCPEM   | 1.49 |      |
| SOCWAI   | 2.60 |      |
| VUNMIA   | 2.64 |      |
| CACZIP10 | 1.49 |      |
| WEDXAF   | 0.18 |      |
| GIDKIN02 | 0.48 |      |
| SOCVUB   | 1.30 |      |
| JOHCEP   | 0.25 |      |
| SISKOU   | 3.14 | 3.68 |
| SONMUE   | 0.16 |      |

|          |      |      |
|----------|------|------|
| VUPJOF   | 1.38 |      |
| VUPJUL   | 1.51 | 1.44 |
| CELVEU   | 0.99 |      |
| PTHPFE10 | 2.52 |      |
| DEDWUE   | 2.04 |      |
| BUYKUB10 | 0.91 |      |
| KAJBIH   | 3.36 |      |
| COCJIN10 | 0.51 |      |
| PIMTAG   | 0.27 |      |
| YOHMOX   | 1.30 |      |
| YEQPOA   | 1.87 |      |
| CANDAW10 | 0.45 |      |
| PTSQFE10 | 2.26 |      |
| VOFLOR   | 2.29 |      |
| RABHAD   | 1.12 |      |
| JIGNUI   | 1.42 |      |

### The isomer shift calibrations

The equations  $y = kx + b$  correlate density on atom (x) with the isomer shift (y). The densities are in atomic units, the resulting isomer shifts are in mm/s.

=====

#### B3LYP/Partridge-1

+2 eqn:  $y = -0.415417 x + 4914.100608$   
+3, +4 eqn:  $y = -0.362076 x + 4283.128131$   
all eqn:  $y = -0.418388 x + 4949.219306$

#### BPW91/Partridge-1

+2 eqn:  $y = -0.439211 x + 5198.627730$   
+3, +4 eqn:  $y = -0.354372 x + 4194.389259$   
all eqn:  $y = -0.473505 x + 5604.407662$

#### M06/Partridge-1

+2 eqn:  $y = -0.423003 x + 4997.160442$   
+3, +4 eqn:  $y = -0.444197 x + 5247.533444$   
all eqn:  $y = -0.419420 x + 4954.837965$

#### M06-2X/Partridge-1

+2 eqn:  $y = -0.370567 x + 4382.414799$   
+3, +4 eqn:  $y = -0.416372 x + 4924.142329$   
all eqn:  $y = -0.352767 x + 4171.970965$

#### OLYP/Partridge-1

+2 eqn:  $y = -0.418834 x + 4951.190055$   
+3, +4 eqn:  $y = -0.336536 x + 3978.264936$   
all eqn:  $y = -0.448969 x + 5307.301759$

#### O3LYP/Partridge-1

+2 eqn:  $y = -0.401759 x + 4748.279391$   
+3, +4 eqn:  $y = -0.348911 x + 4123.657739$   
all eqn:  $y = -0.420000 x + 4963.792615$



#### PBE/Partridge-1

+2 eqn:  $y = -0.438096 x + 5184.513216$   
+3, +4 eqn:  $y = -0.351946 x + 4164.935453$   
all eqn:  $y = -0.472381 x + 5590.113424$

#### SVWN5/Partridge-1

+2 eqn:  $y = -0.456209 x + 5372.977503$   
+3, +4 eqn:  $y = -0.364626 x + 4294.290051$   
all eqn:  $y = -0.495225 x + 5832.338399$

#### B3LYP/Wachters

+2 eqn:  $y = -0.403244 x + 4683.331863$   
+3, +4, eqn:  $y = -0.347271 x + 4033.261027$   
all, eqn:  $y = -0.409087 x + 4751.159223$

#### BPW91/Wachters

+2 eqn:  $y = -0.430143 x + 4997.158352$   
+3, +4 eqn:  $y = -0.346058 x + 4020.240840$   
all eqn:  $y = -0.465771 x + 5410.914106$

#### M06/Wachters

+2 eqn:  $y = -0.444991 x + 5174.475932$   
+3, +4 eqn:  $y = -0.431490 x + 5017.531584$   
all eqn:  $y = -0.427390 x + 4969.849624$

#### M06-2X/Wachters

+2 eqn:  $y = -0.382461 x + 4434.542519$   
+3, +4 eqn:  $y = -0.387962 x + 4498.403090$   
all eqn:  $y = -0.358582 x + 4157.743628$

#### OLYP/Wachters

+2 eqn:  $y = -0.412265 x + 4787.456787$   
+3, +4 eqn:  $y = -0.332943 x + 3866.259545$   
all eqn:  $y = -0.445584 x + 5174.231901$

#### O3LYP/Wachters

+2 eqn:  $y = -0.395380 x + 4590.578802$   
+3, +4 eqn:  $y = -0.341303 x + 3962.689897$   
all eqn:  $y = -0.415390 x + 4822.827968$

#### PBE/Wachters

+2 eqn:  $y = -0.427967 x + 4971.467448$   
+3, +4 eqn:  $y = -0.343391 x + 3988.918681$   
all eqn:  $y = -0.464242 x + 5392.702744$

#### SVWN5/Wachters

+2 eqn:  $y = -0.445356 x + 5149.087888$

+3, +4 eqn:  $y = -0.355122 x + 4105.751957$   
all eqn:  $y = -0.484710 x + 5603.939113$
